# Supplementary material for: Complete genome sequence analysis of Edwardsiella tarda SC002 from hatchlings of Siamese crocodile
Source: Front Vet Sci. 2023 Mar 9;10:1140655. doi: 10.3389/fvets.2023.1140655 (PMC10034365; doi:10.3389/fvets.2023.1140655)
Supplement: Supplementary file 3 [file Table_3.XLSX]

## Sheet: ARDB
Gene_id	Identity	E_value	Subject_id	Resistance_Type	Min_Identity	Resistance_Requirement	Antibiotic_Resistance	Original_Resistance_Type	Description
Ai.SC002_GM000163	71.4	2.2e-170	ardb_1129	emrd	80	emre	--	emrd	Multidrug resistance efflux pump.
Ai.SC002_GM000310	49.7	3.5e-237	ardb_2135	pbp1a	80	--	penicillin	pbp	The enzyme has a penicillin-insensitive transglycosylase N-terminal domain (formation of linear glycan strands) and a penicillin-sensitive transpeptidase C-terminal domain (cross-linking of the peptide subunits)
Ai.SC002_GM000386	61.8	3e-132	ardb_550	bl1_ec	80	--	cephalosporin	bla_c	Class C beta-lactamase. This enzyme breaks the beta-lactam antibiotic ring open and deactivates the molecule's antibacterial properites.
Ai.SC002_GM000879	59.4	6.2e-215	ardb_2718	pbp2	80	--	penicillin	pbp	The enzyme has a penicillin-insensitive transglycosylase N-terminal domain (formation of linear glycan strands) and a penicillin-sensitive transpeptidase C-terminal domain (cross-linking of the peptide subunits)
Ai.SC002_GM001291	77.6	1.4e-310	ardb_737	arna	80	--	polymyxin	arna	Bifunctional enzyme that catalyzes the oxidative decarboxylation of UDP-glucuronic acid (UDP-GlcUA) to UDP-4-keto-arabinose (UDP-Ara4O) and the addition of a formyl group to UDP-4-amino-4-deoxy-L-arabinose (UDP-L-Ara4N) to form UDP-L-4-formamido-arabinose (UDP-L-Ara4FN). The modified arabinose is attached to lipid A and is required for resistance to polymyxin and cationic antimicrobial peptides.
Ai.SC002_GM001379	78.1	7.6e-182	ardb_2537	mdth	80	--	deoxycholate,fosfomycin	mdth	Major facilitator superfamily transporter. Multidrug resistance efflux pump.
Ai.SC002_GM001527	75.2	7.8e-199	ardb_1993	mdtk	80	--	enoxacin,norfloxacin	mdtk	Major facilitator superfamily transporter. Multidrug resistance efflux pump.
Ai.SC002_GM001546	66.6	5.1e-247	ardb_2704	pbp2	80	--	penicillin	pbp	The enzyme has a penicillin-insensitive transglycosylase N-terminal domain (formation of linear glycan strands) and a penicillin-sensitive transpeptidase C-terminal domain (cross-linking of the peptide subunits)
Ai.SC002_GM001715	54.5	4.5e-28	ardb_1271	emre	80	emrd	aminoglycoside	emre	Multidrug resistance efflux pump.
Ai.SC002_GM001809	43.3	7.6e-90	ardb_202	smef	80	smed,smee	fluoroquinolone	smedef	Resistance-nodulation-cell division transporter system. Multidrug resistance efflux pump.
Ai.SC002_GM002348	68.1	6.8e-159	ardb_2755	bcr	80	--	--	bcr_mfs	--
Ai.SC002_GM002369	66.7	0	ardb_1902	acrb	80	acra,tolc	aminoglycoside,glycylcycline,macrolide,beta_lactam,acriflavin	acr	Resistance-nodulation-cell division transporter system. Multidrug resistance efflux pump.
Ai.SC002_GM002452	75	6.6e-142	ardb_547	acra	80	acrb,tolc	aminoglycoside,glycylcycline,macrolide,beta_lactam,acriflavin	acr	Resistance-nodulation-cell division transporter system. Multidrug resistance efflux pump.
Ai.SC002_GM002453	96.7	0	ardb_111	acrb	80	acra,tolc	aminoglycoside,glycylcycline,macrolide,beta_lactam,acriflavin	acr	Resistance-nodulation-cell division transporter system. Multidrug resistance efflux pump.
Ai.SC002_GM002594	66	1.6e-60	ardb_2454	tet34	80	--	tetracycline	tet_xprt	Xanthine-guanine phosphoribosyltransferase. Mechanism detail unknown.
Ai.SC002_GM002685	53.8	4.2e-235	ardb_492	pbp1b	80	--	penicillin	pbp	The enzyme has a penicillin-insensitive transglycosylase N-terminal domain (formation of linear glycan strands) and a penicillin-sensitive transpeptidase C-terminal domain (cross-linking of the peptide subunits)
Ai.SC002_GM002748	40.3	8e-116	ardb_1290	pbp2b	80	--	penicillin	pbp	The enzyme has a penicillin-insensitive transglycosylase N-terminal domain (formation of linear glycan strands) and a penicillin-sensitive transpeptidase C-terminal domain (cross-linking of the peptide subunits)
Ai.SC002_GM002773	78.9	3.7e-121	ardb_1739	ksga	80	--	kasugamycin	ksga	Specifically dimethylates two adjacent adenosines in the loop of a conserved hairpin near the 3'-end of 16S rRNA in the 30S particle. Its inactivation leads to kasugamycin resistance.
Ai.SC002_GM002776	42.1	2.4e-22	ardb_1785	dfra21	96	--	trimethoprim	dfra	Group A drug-insensitive dihydrofolate reductase, which can not be inhibited by trimethoprim.
Ai.SC002_GM002907	91.2	1.6e-143	ardb_251	baca	30	--	bacitracin	baca	Undecaprenyl pyrophosphate phosphatase, which consists in the sequestration of Undecaprenyl pyrophosphate.
Ai.SC002_GM003066	42.5	8.4e-16	ardb_1267	ykkd	80	ykkc	na_antimicrobials	ykk	Small Multidrug Resistance (SMR) protein family. Multidrug resistance efflux pump, which consists of two proteins.
Ai.SC002_GM003184	71.4	3e-179	ardb_2005	tolc	80	maca,macb,mdte,mdtf,acra,acrb	aminoglycoside,glycylcycline,macrolide,beta_lactam,acriflavin	acr	Resistance-nodulation-cell division transporter system. Multidrug resistance efflux pump.
Ai.SC002_GM003341	78	2.5e-180	ardb_2056	mdfa	80	--	--	mdfa	--
Ai.SC002_GM000039	100	8.6e-164	ardb_2431	bl2b_tem1	100	--	penicillin,cephalosporin_ii,cephalosporin_i	bla_a	Class A beta-lactamase. This enzyme breaks the beta-lactam antibiotic ring open and deactivates the molecule's antibacterial properites.
Ai.SC002_GM000059	100	4.8e-130	ardb_474	qnrs	80	--	fluoroquinolone	qnr	Pentapeptide repeat family, which protects DNA gyrase from the inhibition of quinolones.
Ai.SC002_GM000070	89.9	8e-74	ardb_2969	sul1	80	--	sulfonamide	sul	Sulfonamide-resistant dihydropteroate synthase, which can not be inhibited by sulfonamide.
Ai.SC002_GM000071	99.8	4.6e-227	ardb_2874	cml_e3	90	--	chloramphenicol	cml	Major facilitator superfamily transporter, chloramphenicol efflux pump.
Ai.SC002_GM000073	100	1.5e-244	ardb_2608	teta	85	--	tetracycline	tet_efflux	Major facilitator superfamily transporter, tetracycline efflux pump.
Ai.SC002_GM000076	100	1.8e-161	ardb_528	aph6id	80	--	streptomycin	aph	Aminoglycoside O-phosphotransferase, which modifies aminoglycosides by phosphorylation.
Ai.SC002_GM000077	100	7.9e-119	ardb_46	aph33ib	80	--	streptomycin	aph	Aminoglycoside O-phosphotransferase, which modifies aminoglycosides by phosphorylation.
Ai.SC002_GM000078	100	5.7e-149	ardb_785	sul2	80	--	sulfonamide	sul	Sulfonamide-resistant dihydropteroate synthase, which can not be inhibited by sulfonamide.
Ai.SC002_GM003474	93.2	2.7e-206	ardb_470	tetc	85	--	tetracycline	tet_efflux	Major facilitator superfamily transporter, tetracycline efflux pump.

## Sheet: PHI
Gene_id	Identity	E_value	PHI-base accession	Protein ID	Gene Name	Pathogen ID	Pathogen species	Disease Name	Host species	Gene Function	Experimental evidence	Mutant Phenotype
Ai.SC002_GM000120	51.1	6.2e-35	PHI:2657	A9CFS9	HspL	358	Agrobacterium tumefaciens	Crown Gall Disease	Solanum tuberosum (related: potato)	Functions as a VirB8 chaperone to promote T4SS-mediated DNA transfer	gene deletion: full	reduced virulence
Ai.SC002_GM000121	44.1	3e-27	PHI:2657	A9CFS9	HspL	358	Agrobacterium tumefaciens	Crown Gall Disease	Solanum tuberosum (related: potato)	Functions as a VirB8 chaperone to promote T4SS-mediated DNA transfer	gene deletion: full	reduced virulence
Ai.SC002_GM000134	41.6	7.1e-138	PHI:9177	A0A0F6B8Q0	HilE (STM14_4514)	28901	Salmonella enterica	salmonellosis	Mus musculus (related: house mouse)	Putative inner membrane protein	gene mutation	reduced virulence
Ai.SC002_GM000139	90.6	0	PHI:9162	Q8Z2I0	SpoT	28901	Salmonella enterica	Salmonellosis	Mus musculus (related: house mouse)	Bifunctional (p)ppGpp synthetase II/ guanosine-3',5'-bis pyrophosphate 3'-pyrophosphohydrolase	Gene deletion: full; gene complementation	reduced virulence
Ai.SC002_GM000144	64.5	9.8e-143	PHI:5573	A0A0D6I3U0	envC	28901	Salmonella enterica	Salmonellosis	Mus musculus (related: house mouse)	Determinants for intrinsic CAMP resistance	gene mutation	reduced virulence
Ai.SC002_GM000152	79.9	1.1e-216	PHI:8513__PHI:8689	NA
Ai.SC002_GM000153	90.5	4.9e-117	PHI:4523__PHI:8273__PHI:9363	NA
Ai.SC002_GM000154	54.9	1.3e-36	PHI:8515	D2TU75	cpxP	67825	Citrobacter rodentium	colitis	Mus musculus (related: house mouse)	Periplasmic protein	gene deletion: full	unaffected pathogenicity
Ai.SC002_GM000157	89.4	6e-166	PHI:9309	D4HUC7	pfkA	552	Erwinia amylovora	Fire blight	Malus domestica (related: apple)	ATP-dependent 6-phosphofructokinase	gene mutation	reduced virulence
Ai.SC002_GM000164	43.7	1.3e-70	PHI:6486__PHI:6487	NA
Ai.SC002_GM000176	93.3	1.8e-53	PHI:9083	P06203	metJ	28901	Salmonella enterica	Salmonellosis	Homo sapiens (related: human)	Master repressor of the methionine regulon	Gene mutation	reduced virulence
Ai.SC002_GM000177	77.5	1.7e-167	PHI:8570	E0SGC8	metB (Dda3937_03888)	204038	Dickeya dadantii	Soft rot disease	Cichorium intybus (related: chicory)	Cystathionine gamma-synthase	gene deletion: full	reduced virulence
Ai.SC002_GM000191	45	4.2e-102	PHI:6983	P02941	cheM	28901	Salmonella enterica	Salmonellosis	Homo sapiens (related: human)	Methyl-accepting chemotaxis protein	Gene deletion: full; gene complementation	reduced virulence
Ai.SC002_GM000200	45.7	8.3e-62	PHI:7820	H7C7Q3	oppD (bb0334)	139	Borreliella burgdorferi	Lyme disease	Mus musculus (related: house mouse)	Oligopepeptide (Opp) transporter that drives transport by hydrolyzing ATP	Gene mutation; Chemical complementation	reduced virulence
Ai.SC002_GM000201	46.6	3.9e-59	PHI:7821	H7C7L2	oppF (bb0335)	139	Borreliella burgdorferi	Lyme disease	Mus musculus (related: house mouse)	Oligopepeptide (Opp) transporter that drives transport by hydrolyzing ATP	Gene mutation; Chemical complementation	reduced virulence
Ai.SC002_GM000205	64.1	0	PHI:4694	D0ZKI3	bcsA	28901	Salmonella enterica	Salmonellosis	Mus musculus (related: house mouse)	cellulose synthesis regulation	gene mutation	increased virulence (hypervirulence)
Ai.SC002_GM000209	45.2	2.3e-151	PHI:8644__PHI:8642	NA
Ai.SC002_GM000211	60.2	4e-172	PHI:4189	Q7CG15	ypo3991	632	Yersinia pestis	Bubonic Plague	Mus musculus (related: house mouse)	putative DNA binding protein	gene deletion: partial; gene complementation	reduced virulence
Ai.SC002_GM000220	56.4	1.3e-152	PHI:6980	A0A0F6B845	tcp	28901	Salmonella enterica	Salmonellosis	Homo sapiens (related: human)	Methyl-accepting chemotaxis protein	gene deletion: full	reduced virulence
Ai.SC002_GM000221	48.9	2.1e-116	PHI:4904	C4YR40	Glr1	5476	Candida albicans	Disseminated Candidiasis	Galleria mellonella (related: greater wax moth)	Glutathione recycling enzymes/ glutathione reductase	gene disruption; gene complementation	reduced virulence
Ai.SC002_GM000232	41.5	2.2e-40	PHI:5423	Q8YG33	BMEI1329	29459	Brucella melitensis	Ovine Brucellosis	Mus musculus (related: house mouse)	Two-component response regulator	gene deletion: full; gene complementation	reduced virulence
Ai.SC002_GM000240	77	0	PHI:7573	Q669S4	MgtB	633	Yersinia pseudotuberculosis	zoonotic infection	Galleria mellonella (related: Greater wax moth)	Magnesium ion transporter	Gene deletion: full; Gene complementation	reduced virulence
Ai.SC002_GM000268	42.4	1.4e-54	PHI:6319	Q8DPC2	potA	1313	Streptococcus pneumoniae	Pneumococcal pneumonia	Mus musculus (related: house mouse)	ABC transporter ATP-binding protein - spermidine/putrescine transport	Gene mutation	reduced virulence
Ai.SC002_GM000273	42.2	1.3e-57	PHI:6545	Q9L7R1	yihW	28901	Salmonella enterica	Salmonellosis	Mus musculus (related: house mouse)	O-Antigen Capsule	gene deletion: full; gene complementation	unaffected pathogenicity
Ai.SC002_GM000274	78.7	3.9e-236	PHI:3272	Q8CWG4	glpD	632	Yersinia pestis	Pneumonic Plague	Mus musculus (related: house mouse)	Glycerol-3-phosphate dehydrogenase involved in glycerol fermentation	gene deletion: full; gene complementation	unaffected pathogenicity
Ai.SC002_GM000275	47.4	1.7e-212	PHI:2062__PHI:3815	NA
Ai.SC002_GM000276	72.9	2.3e-206	PHI:10051	P05416	glgA	28901	Salmonella enterica	Salmonellosis	Mus musculus (related: house mouse)	Glycogen synthase	Gene mutation; gene complementation	reduced virulence
Ai.SC002_GM000277	41.7	2.6e-87	PHI:6731	P9WN43	glgC	1773	Mycobacterium tuberculosis	tuberculosis	Mus musculus (related: house mouse)	Glucose-1-phosphate adenylyltransferase	Gene mutation	reduced virulence
Ai.SC002_GM000280	41.1	1.5e-82	PHI:6731	P9WN43	glgC	1773	Mycobacterium tuberculosis	tuberculosis	Mus musculus (related: house mouse)	Glucose-1-phosphate adenylyltransferase	Gene mutation	reduced virulence
Ai.SC002_GM000282	44.6	3e-182	PHI:2062__PHI:3815	NA
Ai.SC002_GM000287	99.4	5.2e-98	PHI:2684	P0A2T6	crp	28901	Salmonella enterica	Food Poisoning	Mus musculus (related: house mouse)	Regulators of systemic infection	gene deletion: full; gene complementation	reduced virulence
Ai.SC002_GM000293	68.2	7.2e-306	PHI:6941	A0A0F6UGK4	feoB	287	Pseudomonas aeruginosa	Pneumonia	Mus musculus (related: house mouse)	Ferrous iron transport protein	Gene mutation; gene complementation	loss of pathogenicity
Ai.SC002_GM000297	86	3.7e-76	PHI:7131	Q8ZLJ2	greB	28901	Salmonella enterica	Salmonellosis	Mus musculus (related: house mouse)	Transcription elongation factor	Gene mutation	loss of pathogenicity
Ai.SC002_GM000298	98.7	1.1e-132	PHI:8656	E0SJT3	ompR	204038	Dickeya dadantii	Soft rot disease	Cichorium intybus (related: chicory)	DNA-binding response regulator in two-component regulatory system	Gene mutation	reduced virulence
Ai.SC002_GM000299	84.7	7.3e-221	PHI:8655	E0SJT2	envZ	204038	Dickeya dadantii	Soft rot disease	Cichorium intybus (related: chicory)	Sensory histidine kinase in two-component regulatory system	Gene mutation	reduced virulence
Ai.SC002_GM000300	47.4	7.9e-118	PHI:424	F5HAA8	PCK1	5207	Cryptococcus neoformans	Cryptococcosis	Mus musculus (related: house mouse)	Phosphoenolpyruvate carboxykinase	gene deletion; gene complementation	reduced virulence
Ai.SC002_GM000316	55	3.5e-101	PHI:4250	C5A9K4	aroB	337	Burkholderia glumae	Panicle Blight	Oryza sativa (related: rice)	3-dehydroquinate synthase	gene mutation	reduced virulence
Ai.SC002_GM000326	54	2.2e-43	PHI:7633	Q9I2U9	ppiB	287	Pseudomonas aeruginosa	Infections	Lactuca sativa (related: garden lettuce)	Peptidyl-prolyl cis-trans isomerase	gene deletion: full	reduced virulence
Ai.SC002_GM000327	60.9	2.6e-63	PHI:3941	Q4UZG1	XC_0481	339	Xanthomonas campestris	Black Rot Disease	Raphanus sativus (related: radish)	Anthranilate synthase component II	gene mutation	reduced virulence
Ai.SC002_GM000328	71.6	2.2e-165	PHI:8863	B5F8I0	ArgD	28901	Salmonella enterica	Infections	Mus musculus (related: house mouse)	Acetylornithine/succinyldiaminopimelate aminotransferase	Gene mutation	reduced virulence
Ai.SC002_GM000335	74.3	8.2e-111	PHI:4584	K8DPN9	FkpA	535744	Cronobacter universalis	Meningitis; Bacteremia	Homo sapiens (related: human)	virulence factor	gene mutation; gene complementation	reduced virulence
Ai.SC002_GM000341	56.8	2.8e-34	PHI:1599	I1RZ39	GzOB039	5518	Fusarium graminearum	Fusarium Ear Blight	Triticum (related: wheat)	transcription factor	gene deletion	unaffected pathogenicity
Ai.SC002_GM000349	46.2	1e-59	PHI:1569	I1RCH5	GzOB009	5518	Fusarium graminearum	Fusarium Ear Blight	Triticum (related: wheat)	transcription factor	gene deletion	lethal
Ai.SC002_GM000366	41.5	6.1e-92	PHI:5257	Q8Y448	secY	1639	Listeria monocytogenes	Listeriosis	Mus musculus (related: house mouse)	Protein translocase subunit SecY	gene mutation	increased virulence (hypervirulence)
Ai.SC002_GM000376	72.8	6.6e-184	PHI:2694	Q6D000	rsmB	29471	Pectobacterium atrosepticum	Rotting Of Tubers; Blackleg Disease Of The Plant Stem	Solanum tuberosum (related: potato)	Modulates plant cell wall-degrading enzymes	gene deletion: full; gene complementation	reduced virulence
Ai.SC002_GM000383	48.7	2.5e-59	PHI:7791	G7TM49	AroE (XOC_4333)	347	Xanthomonas oryzae	rice bacterial blight	Oryza sativa (related: rice)	Shikimate 5-dehydrogenase	Gene deletion: full; gene complementation	reduced virulence
Ai.SC002_GM000386	59.6	9.9e-128	PHI:6133	Q6PT92	blaCMY-2	28901	Salmonella enterica	salmonellosis	Mus musculus (related: house mouse)	Beta-lactamase	Functional test in host: transient expression	reduced virulence
Ai.SC002_GM000387	77.3	1.4e-143	PHI:9313	D4I2T4	metA	552	Erwinia amylovora	Fire blight	Malus domestica (related: apple)	Homoserine O-succinyltransferase	gene mutation	reduced virulence
Ai.SC002_GM000389	45.9	2.1e-56	PHI:9444	J4VZT4	Bbakr1 (XP_008600433.1)	176275	Beauveria bassiana	white muscardine disease	Galleria mellonella (related: Greater wax moth)	Aldo/keto reductase	altered gene expression / gene regulation: overexpression	unaffected pathogenicity
Ai.SC002_GM000394	50.3	4.6e-41	PHI:2737	Q5H2X8	SSBX	347	Xanthomonas oryzae	Leaf Blight	Oryza sativa (related: rice)	Single-stranded DNA-binding protein	gene deletion: full	reduced virulence
Ai.SC002_GM000397	48.3	3.5e-71	PHI:9014	A0A0K0GGF6	PXO_RS02690	347	Xanthomonas oryzae	bacterial leaf blight	Oryza sativa (related: rice)	Response regulator	Gene mutation	unaffected pathogenicity
Ai.SC002_GM000402	48.1	9.3e-79	PHI:3475	Q97NA2	arcC	1313	Streptococcus pneumoniae	Pneumococcal Pneumonia	Mus musculus (related: house mouse)	Part of the arginine deiminase system	gene deletion: full; gene complementation	reduced virulence
Ai.SC002_GM000421	47.6	1.9e-17	PHI:9172	A0A0H2X4X9	XC_0520 (flp)	339	Xanthomonas campestris	black rot disease	Capsicum annuum (no common name found)	Fis-like DNA-binding protein	Gene deletion: full; gene complementation	reduced virulence
Ai.SC002_GM000472	44.2	4.9e-12	PHI:8542	Q2KKC1	OadD	1351	Enterococcus faecalis	nosocomial infections	Homo sapiens (related: human)	Biotin acceptor protein	gene deletion: full	reduced virulence
Ai.SC002_GM000485	61.6	1.5e-163	PHI:3952	Q4UWJ5	XC_1510	339	Xanthomonas campestris	Black Rot Disease	Raphanus sativus (related: radish)	TldD protein, DNA gyrase control	gene mutation	reduced virulence
Ai.SC002_GM000494	40.8	2.3e-95	PHI:7787	Q88BC5	AldA (PSPTO_0092)	317	Pseudomonas syringae	bacterial speck of tomato	Arabidopsis thaliana (related: thale cress)	Indole-3-acetaldehyde dehydrogenase	Gene disruption	reduced virulence
Ai.SC002_GM000504	57.4	2.2e-110	PHI:2634	A0A0H2XHH2	argF	1280	Staphylococcus aureus	Community-Associated And Nosocomial Infections	Mus musculus (related: house mouse)	Ornithine carbamoyltransferase	gene disruption	unaffected pathogenicity
Ai.SC002_GM000515	43.8	2.4e-63	PHI:10104	A0A0F6B0W9	STM14_RS07730 (ynhG)	28901	Salmonella enterica	Infections	Lactuca sativa (related: garden lettuce)	Murein L,D-transpeptidase	Gene deletion: full	reduced virulence
Ai.SC002_GM000542	40	3.2e-143	PHI:7723	Q8XWV5	speC (RSc2365)	305	Ralstonia solanacearum	Bacterial wilt	Solanum lycopersicum (related: Tomato)	Ornithine decarboxylase	Gene deletion: full; Gene complementation	loss of pathogenicity
Ai.SC002_GM000543	71.1	2.1e-177	PHI:9154	P0AAF1	potE	562	Escherichia coli	colibacillosis	Gallus gallus (related: chicken)	no data found	gene mutation; gene complementation	unaffected pathogenicity
Ai.SC002_GM000544	69.7	3.9e-298	PHI:9151	P21169	speC	562	Escherichia coli	colibacillosis	Gallus gallus (related: chicken)	Constitutive ornithine decarboxylase	gene mutation	unaffected pathogenicity
Ai.SC002_GM000559	49.5	1.3e-101	PHI:2643	A4HTK3	CFAS	5671	Leishmania infantum	Leishmaniasis	Mus musculus (related: house mouse)	Cyclopropane fatty acid synthetase	gene deletion: full; gene complementation	reduced virulence
Ai.SC002_GM000576	59.3	3.2e-36	PHI:6097	A6TAK8	hns	573	Klebsiella pneumoniae	Pneumonia	Mus musculus (related: house mouse)	pleiotropic regulator	gene mutation; gene complementation	increased virulence (hypervirulence)
Ai.SC002_GM000579	57.8	1.1e-118	PHI:877	G4NCL5	MGG_00383	318829	Magnaporthe oryzae	Rice Blast	Oryza sativa (related: rice)	Hypothetical protein	gene disruption	reduced virulence
Ai.SC002_GM000581	85.2	5e-154	PHI:9150	P60651	speB	562	Escherichia coli	colibacillosis	Gallus gallus (related: chicken)	Agmatinase	gene mutation	unaffected pathogenicity
Ai.SC002_GM000583	47.9	2.1e-165	PHI:8028	Q8MPM3	Tkt	5665	Leishmania mexicana	leishmaniasis	Homo sapiens (related: human)	Transketolase	Gene deletion: full; gene complementation	loss of pathogenicity
Ai.SC002_GM000587	96.1	2.7e-87	PHI:10179	A0A0D6I594	tnpA	28901	Salmonella enterica	salmonellosis	Homo sapiens (related: human)	Regulatory RNA/ transposase for IS200	Gene deletion: full	increased virulence (hypervirulence)
Ai.SC002_GM000599	67	1.7e-152	PHI:7028	P25535	ubiI	562	Escherichia coli	Urinary tract infections	Mus musculus (related: house mouse)	Aerobic ubiquinone-8 synthase	Gene mutation; gene complementation	reduced virulence
Ai.SC002_GM000603	89.6	0	PHI:2961	C5BAT0	gcvP	67780	Edwardsiella ictaluri	Enteric Septicemia	Ictalurus punctatus (related: channel catfish)	Glycine dehydrogenase	gene deletion: partial	reduced virulence
Ai.SC002_GM000621	54.7	4.5e-91	PHI:7946	W9BFU2	lpxL1 (BN49_2155)	573	Klebsiella pneumoniae	pneumonia	Galleria mellonella (related: Greater wax moth)	Lipid A late acyltransferase	Gene deletion: full; gene complementation	reduced virulence
Ai.SC002_GM000628	70.5	2.4e-170	PHI:8581	E0SEI0	lysA (Dda3937_02577)	204038	Dickeya dadantii	Soft rot disease	Cichorium intybus (related: chicory)	Diamiopimelate decarboxylase	gene deletion: full	reduced virulence
Ai.SC002_GM000629	41.8	5.7e-68	PHI:10060	A0A0F6B5Q0	STM14_RS15235	28901	Salmonella enterica	Infections	Lactuca sativa (related: garden lettuce)	Anaerobic nitric oxide reductase flavorubredoxin	Gene deletion: full	unaffected pathogenicity
Ai.SC002_GM000631	71	1.8e-133	PHI:10079	A0A0F6B5S4	STM14_RS15330	28901	Salmonella enterica	Infections	Lactuca sativa (related: garden lettuce)	Formate hydrogenlyase transcriptional activator	Gene deletion: full	unaffected pathogenicity
Ai.SC002_GM000632	68.8	4.9e-151	PHI:10078	A0A0F6B5S3	STM14_RS15325	28901	Salmonella enterica	Infections	Lactuca sativa (related: garden lettuce)	Hydrogenase expression/formation protein	Gene deletion: full	unaffected pathogenicity
Ai.SC002_GM000633	51.1	2e-19	PHI:10077	A0A0F6B5S2	STM14_RS15320	28901	Salmonella enterica	Infections	Lactuca sativa (related: garden lettuce)	Hydrogenase formation protein	Gene deletion: full	unaffected pathogenicity
Ai.SC002_GM000634	74.6	3.7e-90	PHI:10076	A0A0F6B5S1	STM14_RS15315	28901	Salmonella enterica	Infections	Lactuca sativa (related: garden lettuce)	Hydrogenase assembly chaperone	Gene deletion: full	unaffected pathogenicity
Ai.SC002_GM000636	54.4	1.3e-33	PHI:10075	A0A0F6B5S0	STM14_RS15310	28901	Salmonella enterica	Infections	Lactuca sativa (related: garden lettuce)	Hydrogenase nickel incorporation protein	Gene deletion: full	unaffected pathogenicity
Ai.SC002_GM000637	58.7	2.6e-236	PHI:10063	A0A0F6B5Q4	STM14_RS15250	28901	Salmonella enterica	Infections	Lactuca sativa (related: garden lettuce)	Electron transport protein	Gene deletion: full	unaffected pathogenicity
Ai.SC002_GM000638	63.9	1.2e-67	PHI:10064	A0A0F6B5Q6	STM14_RS15255	28901	Salmonella enterica	Infections	Lactuca sativa (related: garden lettuce)	Hypothetical protein	Gene deletion: full	unaffected pathogenicity
Ai.SC002_GM000641	64.1	4.1e-54	PHI:10066	A0A0F6B5Q9	STM14_RS15265	28901	Salmonella enterica	Infections	Lactuca sativa (related: garden lettuce)	Formate hydrogenlyase maturation protein	Gene deletion: full	unaffected pathogenicity
Ai.SC002_GM000642	52.3	3.4e-31	PHI:10067	A0A0F6B5R0	STM14_RS15270	28901	Salmonella enterica	Infections	Lactuca sativa (related: garden lettuce)	NADH-quinone oxidoreductase subunit	Gene deletion: full	unaffected pathogenicity
Ai.SC002_GM000643	71.8	5.1e-105	PHI:10068	A0A0F6B5R1	STM14_RS15275	28901	Salmonella enterica	Infections	Lactuca sativa (related: garden lettuce)	Formate hydrogenlyase complex iron-sulfur subunit	Gene deletion: full	unaffected pathogenicity
Ai.SC002_GM000644	54.2	3.3e-55	PHI:10069	A0A0F6B5R2	STM14_RS15280	28901	Salmonella enterica	Infections	Lactuca sativa (related: garden lettuce)	Formate hydrogenlyase subunit 5	Gene deletion: full	unaffected pathogenicity
Ai.SC002_GM000645	84.5	4.6e-294	PHI:10070	A0A0F6B5R3	STM14_RS15285	28901	Salmonella enterica	Infections	Lactuca sativa (related: garden lettuce)	Formate hydrogenlyase subunit 4	Gene deletion: full	unaffected pathogenicity
Ai.SC002_GM000646	68.4	6.2e-115	PHI:10071	A0A0F6B5R4	STM14_RS15290	28901	Salmonella enterica	Infections	Lactuca sativa (related: garden lettuce)	Formate hydrogenlyase subunit 3	Gene deletion: full	unaffected pathogenicity
Ai.SC002_GM000647	43.6	1.7e-140	PHI:10072	A0A0F6B5R5	STM14_RS15295	28901	Salmonella enterica	Infections	Lactuca sativa (related: garden lettuce)	Formate hydrogenlyase subunit 2	Gene deletion: full	unaffected pathogenicity
Ai.SC002_GM000648	62.7	7.7e-74	PHI:10073	A0A0F6B5R6	STM14_RS15300	28901	Salmonella enterica	Infections	Lactuca sativa (related: garden lettuce)	Formate hydrogenlyase regulator	Gene deletion: full	unaffected pathogenicity
Ai.SC002_GM000655	51.1	1.2e-62	PHI:3118	Q882D7	PSPTO_2691	317	Pseudomonas syringae	Bacterial Speck Of Tomato	Nicotiana tabacum (related: common tobacco)	Membrane protein, TerC family	gene mutation	unaffected pathogenicity
Ai.SC002_GM000657	66.4	2.5e-60	PHI:7474	Q9X4P2	PA0336 (RppH)	287	Pseudomonas aeruginosa	Infections	Caenorhabditis elegans (related: roundworm)	Nudix-type RNA pyrophosphohydrolase	Gene mutation; Gene complementation	increased virulence (hypervirulence)
Ai.SC002_GM000661	56.2	1.7e-44	PHI:4145	Q8PLR7	XAC1722	346	Xanthomonas citri	Citrus Canker	Citrus sinensis (related: sweet orange)	2C-methyl-D-erythritol 2,4-cyclodiphosphate synthase	gene mutation	reduced virulence
Ai.SC002_GM000664	74.8	5.3e-86	PHI:6187	Q8ZMF9	pimt	28901	Salmonella enterica	salmonellosis	Mus musculus (related: house mouse)	Protein isoaspartate methyl transferase	Gene mutation; gene complementation	reduced virulence
Ai.SC002_GM000665	69.6	2.4e-122	PHI:9369	Q7CKC8	nlpD	632	Yersinia pestis	Bubonic plague	Mus musculus (related: house mouse)	Lipoprotein	gene mutation; gene complementation	reduced virulence
Ai.SC002_GM000666	87.2	4.3e-159	PHI:3336	D4HX24	rpoS	552	Erwinia amylovora	Fire Blight	Pyrus communis (related: pear)	regulation of stress and starvation response	gene disruption; gene complementation	unaffected pathogenicity
Ai.SC002_GM000670	42.3	6.4e-56	PHI:9479	Q9I6V6	mcpB (aer2, PA0176)	287	Pseudomonas aeruginosa	infection	Capsicum annuum (no common name found)	Chemoreceptor	Gene deletion: full; gene complementation	unaffected pathogenicity
Ai.SC002_GM000677	59.8	3.2e-107	PHI:4702	P0A452	recA	1313	Streptococcus pneumoniae	Pneumococcal Pneumonia	Mus musculus (related: house mouse)	DNA recombination and repair	gene deletion: full	reduced virulence
Ai.SC002_GM000683	41.7	5.3e-103	PHI:9280	Q9HTY6	gshA	287	Pseudomonas aeruginosa	urinary tract infection	Mus musculus (related: house mouse)	Glutamate-cysteine ligase	Gene deletion; gene complementation	reduced virulence
Ai.SC002_GM000684	78.8	1e-74	PHI:3731	A1AEN2	LuxS	562	Escherichia coli	Colibacillosis; Cellulitis; Swollen Head Syndrome	Gallus gallus (related: chicken)	controller in the Quorum sensing	gene deletion; gene complementation	reduced virulence
Ai.SC002_GM000698	52.5	6.4e-95	PHI:8884	Q8XW15	aroG1	305	Ralstonia solanacearum	Bacterial wilt	Nicotiana tabacum (related: common tobacco)	Phospho-2-dehydro-3-deoxyheptonate aldolase	Gene deletion: full; gene complementation	loss of pathogenicity
Ai.SC002_GM000701	76.8	3.7e-46	PHI:3675__PHI:3681	NA
Ai.SC002_GM000705	55.5	1.4e-265	PHI:9919	P9WPD1	clpB	1773	Mycobacterium tuberculosis	tuberculosis	Homo sapiens (related: human)	Chaperone protein	Gene deletion: full; gene complementation	reduced virulence
Ai.SC002_GM000707	44.3	1.9e-51	PHI:2975	Q9JP38	ipx10	317	Pseudomonas syringae	Bacterial Speck Of Tomato	Solanum lycopersicum (related: tomato)	Effector	gene mutation	effector (plant avirulence determinant)
Ai.SC002_GM000713	41	2.6e-76	PHI:2304	B0JFC8	BCFHG1	40559	Botrytis cinerea	Grey Mold	Arabidopsis thaliana (related: thale cress)	NO detoxi cation	gene deletion: full	unaffected pathogenicity
Ai.SC002_GM000714	94.7	3.4e-233	PHI:2962	C5BEV2	glyA	67780	Edwardsiella ictaluri	Enteric Septicemia	Ictalurus punctatus (related: channel catfish)	Serine h ydroxymethyltra nsferase	gene deletion: partial	reduced virulence
Ai.SC002_GM000716	54.2	6.3e-76	PHI:3915	Q02RX2	SuhB	287	Pseudomonas aeruginosa	Nosocomial Infections	Mus musculus (related: house mouse)	an essential gene for the T3SS gene expression	gene mutation	loss of pathogenicity
Ai.SC002_GM000718	85.6	8e-68	PHI:3043__PHI:7900	NA
Ai.SC002_GM000720	89.8	1.5e-62	PHI:6892	A0A0L9JQ40	iscU	28901	Salmonella enterica	Salmonellosis	Mus musculus (related: house mouse)	Fe-S cluster sensor	Gene mutation	reduced virulence
Ai.SC002_GM000728	69.2	5.3e-53	PHI:6438	Q59636	Ndk	287	Pseudomonas aeruginosa	nosocomial infections	Mus musculus (related: house mouse)	Host-responsive regulator/Nucleoside diphosphate kinase	Gene mutation	increased virulence (hypervirulence)
Ai.SC002_GM000747	92.4	6.1e-233	PHI:9306	D4HYB2	guaB	552	Erwinia amylovora	Fire blight	Malus domestica (related: apple)	Inosine-5'-monophosphate dehydrogenase	gene mutation	reduced virulence
Ai.SC002_GM000748	49.4	2.1e-147	PHI:6871	J9VUY6	gua1	5207	Cryptococcus neoformans	fungal meningitis	Caenorhabditis elegans (related: roundworm)	GMP synthase	Gene deletion: full; gene complementation	loss of pathogenicity
Ai.SC002_GM000751	63.6	8.1e-158	PHI:3950	Q4UYA7	XC_0892	339	Xanthomonas campestris	Black Rot Disease	Raphanus sativus (related: radish)	Glutamate-1-semialdehyde aminotransferase	gene mutation	reduced virulence
Ai.SC002_GM000758	79.2	2.8e-212	PHI:8690	D2TI49	degP (ROD_01651)	67825	Citrobacter rodentium	Colitis	Mus musculus (related: house mouse)	Periplasmic serine endoprotease DegP-like	altered gene expression / gene regulation	unaffected pathogenicity
Ai.SC002_GM000759	41.5	6.1e-35	PHI:6319	Q8DPC2	potA	1313	Streptococcus pneumoniae	Pneumococcal pneumonia	Mus musculus (related: house mouse)	ABC transporter ATP-binding protein - spermidine/putrescine transport	Gene mutation	reduced virulence
Ai.SC002_GM000764	77.6	7.2e-73	PHI:5407__PHI:7646	NA
Ai.SC002_GM000771	89.8	2.5e-253	PHI:7966	P0A853	tnaA	562	Escherichia coli	urinary tract infection	Caenorhabditis elegans (related: roundworm)	Tryptophanase	Gene mutation	reduced virulence
Ai.SC002_GM000776	78.6	7.2e-66	PHI:4218	A1AEE9	smpB	562	Escherichia coli	Avian Colibacillosis	Gallus gallus (related: chicken)	trans -translation is a bacterial translational control system that directs the modi cation and degradation of proteins,	gene disruption; gene complementation	reduced virulence
Ai.SC002_GM000788	94.2	1.2e-97	PHI:2680	P0A2F0	rpoE	28901	Salmonella enterica	Food Poisoning	Mus musculus (related: house mouse)	Regulators of systemic infection	gene deletion: full; gene complementation	reduced virulence
Ai.SC002_GM000794	92.5	9.7e-118	PHI:3724	Q56056	RNase III	28901	Salmonella enterica	Food Poisoning	Galleria mellonella (related: greater wax moth)	endoribonucleases	gene mutation; gene complementation	reduced virulence
Ai.SC002_GM000799	65.2	0	PHI:562	Q8Z445	barA	28901	Salmonella enterica	Gastroenteritis	Mus musculus (related: house mouse)	no data found	gene deletion	unaffected pathogenicity
Ai.SC002_GM000801	82	0	PHI:9161	Q8Z447	RelA	28901	Salmonella enterica	Salmonellosis	Mus musculus (related: house mouse)	GTP pyrophosphokinase	Gene deletion: full; gene complementation	reduced virulence
Ai.SC002_GM000816	40	2.2e-20	PHI:8830	B4EGR6	bcam1161	95486	Burkholderia cenocepacia	cystic fibrosis-like conditions	Galleria mellonella (related: Greater wax moth)	Putative cyclic-di-GMP signaling protein	Gene mutation	increased virulence (hypervirulence)
Ai.SC002_GM000818	68.5	1.4e-62	PHI:7633	Q9I2U9	ppiB	287	Pseudomonas aeruginosa	Infections	Lactuca sativa (related: garden lettuce)	Peptidyl-prolyl cis-trans isomerase	gene deletion: full	reduced virulence
Ai.SC002_GM000824	61.2	4.4e-254	PHI:3781	D0ZEM2	inv	636	Edwardsiella tarda	No Data Found	Danio rerio (related: zebrafish)	required to initiate the internalization of a bacterium into the host organism	gene deletion; gene complementation	reduced virulence
Ai.SC002_GM000826	51.7	2.1e-77	PHI:6983	P02941	cheM	28901	Salmonella enterica	Salmonellosis	Homo sapiens (related: human)	Methyl-accepting chemotaxis protein	Gene deletion: full; gene complementation	reduced virulence
Ai.SC002_GM000832	76.6	6.9e-82	PHI:7956	A6T684	pagP	573	Klebsiella pneumoniae	pneumonia	Galleria mellonella (related: Greater wax moth)	Acyltransferase	Gene mutation	unaffected pathogenicity
Ai.SC002_GM000842	45.5	1.1e-34	PHI:3777	D0ZVH8	pagC	28901	Salmonella enterica	Self-Limiting Gastroenteritis In Humans And A Typhoid-Like Disease In Mice	Mus musculus (related: house mouse)	Secreted effector protein	gene mutation; gene complementation	effector (plant avirulence determinant)
Ai.SC002_GM000864	40.6	1.3e-36	PHI:2322	Q4WF54	SidH	746128	Aspergillus fumigatus	Aspergillosis	Mus musculus (related: house mouse)	Anoyl-CoA hydratase	gene deletion: full; gene complementation	reduced virulence
Ai.SC002_GM000872	62.5	6.5e-14	PHI:2415	P57051	tatA	666	Vibrio cholerae	Cholera	Mus musculus (related: house mouse)	Translocate folded proteins; virulence	gene mutation: characterised; gene complementation	reduced virulence
Ai.SC002_GM000873	58.4	2e-105	PHI:6492	V5VBJ6	lipA	470	Acinetobacter baumannii	nosocomial infections	Mus musculus (related: house mouse)	Lipase	gene deletion: full	reduced virulence
Ai.SC002_GM000877	53.1	7.1e-20	PHI:5448	Q9HVT6	PA4485	287	Pseudomonas aeruginosa	Nosocomial Infections	Mus musculus (related: house mouse)	Cell envelope protein	gene mutation	unaffected pathogenicity
Ai.SC002_GM000889	46.2	4.3e-55	PHI:8623	Q9K033	cab (NMB0789)	487	Neisseria meningitidis	septicemia	Homo sapiens (related: human)	Cysteine ATP binding protein	Other evidence: ectopic complementation	unaffected pathogenicity
Ai.SC002_GM000893	40.7	6.4e-93	PHI:3782	Q9ZI86	PA3984	287	Pseudomonas aeruginosa	Infections	Tenebrio molitor (related: yellow mealworm)	acyltransferases	altered gene expression / gene regulation: overexpression	reduced virulence
Ai.SC002_GM000896	75.8	9.8e-69	PHI:7671	A1JQ74	ybeY	630	Yersinia enterocolitica	yersiniosis	Homo sapiens (related: human)	Endoribonuclease	Gene deletion: full; Gene complementation	reduced virulence
Ai.SC002_GM000900	83.6	1.7e-280	PHI:9327	D4HYW4	asnB	552	Erwinia amylovora	Fire blight	Malus domestica (related: apple)	Asparagine synthase B	gene mutation	unaffected pathogenicity
Ai.SC002_GM000905	59.5	1.2e-90	PHI:5472	G4NB53	MoDeam	318829	Magnaporthe oryzae	Rice Blast	Oryza sativa (related: rice)	GlcN-6-phosphate deaminase	gene deletion: full; gene complementation	reduced virulence
Ai.SC002_GM000911	86.3	4.9e-73	PHI:4887	P0A9A9	Fur	562	Escherichia coli	Urinary Tract Infections	Mus musculus (related: house mouse)	global ferric uptake regulator	gene deletion: full; gene complementation	reduced virulence
Ai.SC002_GM000917	48.6	4.6e-59	PHI:6314	Q48K32	kdpE	317	Pseudomonas syringae	bacterial speck	Caenorhabditis elegans (related: roundworm)	Potassium homeostasis and virulence	Gene mutation	increased virulence (hypervirulence)
Ai.SC002_GM000920	62	4.9e-221	PHI:4712	P57698	kdpB	287	Pseudomonas aeruginosa	Nosocomial Infections	Mus musculus (related: house mouse)	Transport of small molecules	gene mutation	reduced virulence
Ai.SC002_GM000924	58.5	2.7e-102	PHI:10119	A0A0F6B0Y3	STM14_RS07800 (orf319)	28901	Salmonella enterica	Infections	Lactuca sativa (related: garden lettuce)	DUF523 and DUF1722 domain-containing protein	Gene deletion: full	reduced virulence
Ai.SC002_GM000928	57.4	1.4e-68	PHI:5535	A8DB99	expI	554	Pectobacterium carotovorum	Blackleg Disease	Solanum tuberosum (related: potato)	Production of plant cell wall degrading enzymes	gene disruption; gene complementation	reduced virulence
Ai.SC002_GM000929	57	3.7e-75	PHI:4178__PHI:7622	NA
Ai.SC002_GM000933	87.6	4.9e-62	PHI:2958	C5BG70	sdhC	67780	Edwardsiella ictaluri	Enteric Septicemia	Ictalurus punctatus (related: channel catfish)	Succinate dehydrogenase	gene deletion: partial	reduced virulence
Ai.SC002_GM000934	67.8	8e-44	PHI:7963	P0AC44	sdhD	562	Escherichia coli	urinary tract infection	Caenorhabditis elegans (related: roundworm)	Succinate dehydrogenase	Gene mutation	reduced virulence
Ai.SC002_GM000935	90	0	PHI:7964	P0AC41	sdhA	562	Escherichia coli	urinary tract infection	Caenorhabditis elegans (related: roundworm)	Succinate dehydrogenase avoprotein subunit	Gene mutation; gene complementation	reduced virulence
Ai.SC002_GM000936	87.4	4.6e-126	PHI:7965	P07014	sdhB	562	Escherichia coli	urinary tract infection	Caenorhabditis elegans (related: roundworm)	Succinate dehydrogenase iron-sulfur subunit	Gene mutation	reduced virulence
Ai.SC002_GM000948	57.5	4.3e-113	PHI:3472	Q8X965	TolA	562	Escherichia coli	Infections	Galleria mellonella (related: greater wax moth)	Periplasm spanning protein	gene mutation; gene complementation	reduced virulence
Ai.SC002_GM000949	44	7.8e-92	PHI:3137	P50601	TolB	287	Pseudomonas aeruginosa	Infections	Galleria mellonella (related: greater wax moth)	Periplasmic component of the Tol-Pal system, a multi-protein complex present in almost all Gram-negative bacteria which connects the cytoplasmic (or inner) membrane with the outer membrane.	gene mutation	reduced virulence
Ai.SC002_GM000952	63.6	6.5e-129	PHI:8884	Q8XW15	aroG1	305	Ralstonia solanacearum	Bacterial wilt	Nicotiana tabacum (related: common tobacco)	Phospho-2-dehydro-3-deoxyheptonate aldolase	Gene deletion: full; gene complementation	loss of pathogenicity
Ai.SC002_GM000956	73.4	5.1e-159	PHI:6269	P0A6T3	galK	562	Escherichia coli	Urinary tract infections	Mus musculus (related: house mouse)	Galactokinase	Gene mutation	reduced virulence
Ai.SC002_GM000958	58	1.4e-112	PHI:9264	P24325	galE	727	Haemophilus influenzae	nosocomial infections	Mus musculus (related: house mouse)	UDP-glucose 4-epimerase	Gene mutation; gene complementation	unaffected pathogenicity
Ai.SC002_GM000963	51	4.5e-63	PHI:5422	P45323	modA10	727	Haemophilus influenzae	Nosocomial Infections	Rattus (related: rat)	Phase-variable DNA methyltransferase	gene mutation	increased virulence (hypervirulence)
Ai.SC002_GM000995	42.7	1.2e-105	PHI:6981	A0A0F6BB74	tsr	28901	Salmonella enterica	Salmonellosis	Homo sapiens (related: human)	Methyl-accepting chemotaxis protein	gene deletion: full	reduced virulence
Ai.SC002_GM000998	46.1	1.1e-33	PHI:4101	Q63W37	Eco	28450	Burkholderia pseudomallei	Melioidosis	Mus musculus (related: house mouse)	serine protease inhibitor	gene mutation	reduced virulence
Ai.SC002_GM000999	48	4.9e-26	PHI:7475	Q48413	ramA (VK055_1983)	573	Klebsiella pneumoniae	pneumonia	Mus musculus (related: house mouse)	Bacterial regulatory helix-turn-helix, AraC family protein	gene deletion: full	unaffected pathogenicity
Ai.SC002_GM001005	87.3	0	PHI:7577	Q8ZR28	cstA	28901	Salmonella enterica	salmonellosis	Caenorhabditis elegans (related: roundworm)	Peptide-utilizing carbon starvation protein	gene deletion: full	reduced virulence
Ai.SC002_GM001022	73.1	2e-24	PHI:7262	P0A9Y9	cspC	28901	Salmonella enterica	Salmonellosis	Mus musculus (related: house mouse)	Cold shock protein	gene deletion: full	unaffected pathogenicity
Ai.SC002_GM001027	50.6	3.6e-45	PHI:7534	W1ATL3	CcmA (VK055_1938)	573	Klebsiella pneumoniae	pneumonia	Mus musculus (related: house mouse)	Heme ABC exporter, ATP-binding protein	gene deletion: full	unaffected pathogenicity
Ai.SC002_GM001028	66.2	2.7e-80	PHI:7534	W1ATL3	CcmA (VK055_1938)	573	Klebsiella pneumoniae	pneumonia	Mus musculus (related: house mouse)	Heme ABC exporter, ATP-binding protein	gene deletion: full	unaffected pathogenicity
Ai.SC002_GM001036	48.2	2.7e-60	PHI:6900	B8F8P8	vacJ	738	Glaesserella parasuis	Glasser¡¯s disease	Mus musculus (related: house mouse)	virulence related outer membrane lipoprotein	Gene deletion: full; gene complementation	reduced virulence
Ai.SC002_GM001041	48.6	1e-72	PHI:3966	Q4UWE2	XC_1565	339	Xanthomonas campestris	Black Rot Disease	Raphanus sativus (related: radish)	N-5-glutamine S-adenosyl-L-methionine-dependent methyltransferase	gene mutation	reduced virulence
Ai.SC002_GM001042	45.1	2.8e-79	PHI:7654	Q4WJ77	aroB	746128	Aspergillus fumigatus	Invasive pulmonary aspergillosis	Mus musculus (related: house mouse)	Chorismate synthase	Gene deletion: full; Gene complementation	reduced virulence
Ai.SC002_GM001064	85.9	4.3e-259	PHI:8573	E0SL85	purF (Dda3937_02099)	204038	Dickeya dadantii	Soft rot disease	Cichorium intybus (related: chicory)	Amidophosphoribosyl transferase	gene deletion: full	reduced virulence
Ai.SC002_GM001074	75.1	4.7e-312	PHI:9842	Q9KT08	pta	666	Vibrio cholerae	infection	Drosophila melanogaster (related: fruit fly)	Phosphate acetyltransferase	Gene deletion: full	unaffected pathogenicity
Ai.SC002_GM001075	73.4	1e-170	PHI:9843	A0A0H3Q0Y8	ackA	666	Vibrio cholerae	infection	Drosophila melanogaster (related: fruit fly)	Acetate kinase	Gene deletion: full	unaffected pathogenicity
Ai.SC002_GM001081	44.2	3.5e-94	PHI:9989	A0A0K0GPI8	aspC (PXO_02420)	347	Xanthomonas oryzae	bacterial leaf blight	Oryza sativa (related: rice)	Aspartate aminotransferase	Gene deletion: full; gene complementation	reduced virulence
Ai.SC002_GM001086	61.3	1.9e-100	PHI:5089	Q7CJ94	RovM	632	Yersinia pestis	Bubonic Plague	Xenopsylla cheopis (related: oriental rat flea)	LysR-Type Transcriptional Regulator	gene deletion: full; gene complementation	reduced virulence
Ai.SC002_GM001088	41.8	4.1e-20	PHI:10068	A0A0F6B5R1	STM14_RS15275	28901	Salmonella enterica	Infections	Lactuca sativa (related: garden lettuce)	Formate hydrogenlyase complex iron-sulfur subunit	Gene deletion: full	unaffected pathogenicity
Ai.SC002_GM001089	41.6	6.6e-89	PHI:445	I1RA52	NOS1	5518	Fusarium graminearum	Fusarium Ear Blight	Zea mays (related: maize)	Ubiquinone oxidoreductase	gene disruption	reduced virulence
Ai.SC002_GM001094	84.6	2e-86	PHI:8937	Q9I0J4	nuoI (PA2644)	287	Pseudomonas aeruginosa	nosocomial infections	Lactuca sativa (related: garden lettuce)	NADH-quinone oxidoreductase	Gene deletion: full; gene complementation	reduced virulence
Ai.SC002_GM001095	71.6	6.5e-59	PHI:8938	Q9I0J3	nuoJ (PA2645)	287	Pseudomonas aeruginosa	nosocomial infections	Lactuca sativa (related: garden lettuce)	NADH-quinone oxidoreductase	Gene deletion: full; gene complementation	reduced virulence
Ai.SC002_GM001124	59.1	2.9e-39	PHI:7748	P9WJR9	rv3111	1773	Mycobacterium tuberculosis	tuberculosis	Mus musculus (related: house mouse)	Involved in hypoxia-responsive molybdenum cofactor biosynthesis	Gene deletion: full; gene complementation	unaffected pathogenicity
Ai.SC002_GM001134	60.8	7.4e-307	PHI:824__PHI:6838	NA
Ai.SC002_GM001135	55.1	9.1e-293	PHI:3011	P58662	rcsC11	28901	Salmonella enterica	Food Poisoning	Mus musculus (related: house mouse)	Sensor protein	gene mutation	increased virulence (hypervirulence)
Ai.SC002_GM001136	93	3.5e-109	PHI:3012	C4PCU2	rcsB	28901	Salmonella enterica	Food Poisoning	Mus musculus (related: house mouse)	RcsA and RcsB form a complex to promote transcription of the genes for capsule synthesis.	gene mutation	unaffected pathogenicity
Ai.SC002_GM001137	41	1.9e-196	PHI:4481	F8ILW3	sagD	1336	Streptococcus equi	Septicemia; Meningitis; Mastitis	Mus musculus (related: house mouse)	Streptolysin S biosynthesis protein	gene mutation; gene complementation	reduced virulence
Ai.SC002_GM001143	42.6	1.3e-76	PHI:6510__PHI:7620	NA
Ai.SC002_GM001144	46	5.1e-22	PHI:5370	Q57RZ3	ramA	28901	Salmonella enterica	Bacteremia	Mus musculus (related: house mouse)	Transcriptional regulator	gene mutation	reduced virulence
Ai.SC002_GM001149	96.1	2.7e-87	PHI:10179	A0A0D6I594	tnpA	28901	Salmonella enterica	salmonellosis	Homo sapiens (related: human)	Regulatory RNA/ transposase for IS200	Gene deletion: full	increased virulence (hypervirulence)
Ai.SC002_GM001151	40.4	2.5e-30	PHI:10115	A0A0F6B0X9	STM14_RS07780 (ttrB)	28901	Salmonella enterica	Infections	Lactuca sativa (related: garden lettuce)	Tetrathionate reductase subunit B	Gene deletion: full	reduced virulence
Ai.SC002_GM001160	62.2	1.2e-88	PHI:8728	P33772	amiA	28901	Salmonella enterica	Typhoid	Mus musculus (related: house mouse)	N-acetylmuramoyl-L-alanine amidase	Gene mutation; gene complementation	reduced virulence
Ai.SC002_GM001165	84	2.1e-278	PHI:9312	D4HXP6	ptsI	552	Erwinia amylovora	Fire blight	Malus domestica (related: apple)	Phosphoenolpyruvate-protein phosphotransferase	gene mutation	reduced virulence
Ai.SC002_GM001166	97.6	1e-40	PHI:9311	D4HXP5	ptsH	552	Erwinia amylovora	Fire blight	Malus domestica (related: apple)	Phosphocarrier protein HPr	gene mutation	reduced virulence
Ai.SC002_GM001167	40.9	9.6e-55	PHI:6556	Q4X256	mecA	746128	Aspergillus fumigatus	Invasive pulmonary aspergillosis	Mus musculus (related: house mouse)	Cystathionine-beta -synthase	gene deletion: full	reduced virulence
Ai.SC002_GM001170	53	7.9e-192	PHI:7809	A3M2U3	adeN	470	Acinetobacter baumannii	nosocomial infections	Galleria mellonella (related: Greater wax moth)	TetR type regulator	Gene disruption; Gene complementation	increased virulence (hypervirulence)
Ai.SC002_GM001181	73.3	3.1e-225	PHI:5564__PHI:8654	NA
Ai.SC002_GM001199	45.2	6.5e-63	PHI:3793	Q6FM27	ANP1	5478	Candida glabrata	Disseminated Candidiasis	Mus musculus (related: house mouse)	encode alpha -(1-6)-mannosyl-transferases	gene disruption; gene complementation	increased virulence (hypervirulence)
Ai.SC002_GM001209	89.1	8.6e-99	PHI:2652	Q5KQZ9	magA	573	Klebsiella pneumoniae	Urinary Tract Infections; Nosocomial Pneumonia; Intra-Abdominal Infections	Mus musculus (related: house mouse)	Contributes to K1 capsular polysaccharide (CPS) biosynthesis	gene mutation: characterised	reduced virulence
Ai.SC002_GM001223	43.9	1.3e-56	PHI:3112	Q8P8Q1	galU	339	Xanthomonas campestris	Black Rot Disease	Brassica oleracea (no common name found)	Uridine triphosphate (UTP)-glucose-1-phosphate uridylyltransferase	gene mutation: characterised; gene complementation	loss of pathogenicity
Ai.SC002_GM001224	67.4	4.9e-134	PHI:9264	P24325	galE	727	Haemophilus influenzae	nosocomial infections	Mus musculus (related: house mouse)	UDP-glucose 4-epimerase	Gene mutation; gene complementation	unaffected pathogenicity
Ai.SC002_GM001227	50.3	6.7e-129	PHI:9835	A0A384JMC8	bcpgd	40559	Botrytis cinerea	grey mould	Vitis vinifera (related: wine grape)	6-phosphogluconate dehydrogenase	Gene deletion: full; Gene complementation	reduced virulence
Ai.SC002_GM001228	96.1	2.7e-87	PHI:10179	A0A0D6I594	tnpA	28901	Salmonella enterica	salmonellosis	Homo sapiens (related: human)	Regulatory RNA/ transposase for IS200	Gene deletion: full	increased virulence (hypervirulence)
Ai.SC002_GM001234	40.3	9.5e-108	PHI:4910	Q7VMW0	LptA	730	Haemophilus ducreyi	Chancroid	Homo sapiens (related: human)	PEA transferases	gene mutation	unaffected pathogenicity
Ai.SC002_GM001236	82.3	0	PHI:8731	P40729	flhA	28901	Salmonella enterica	Typhoid	Mus musculus (related: house mouse)	Flagellar biosynthesis protein	Gene mutation	reduced virulence
Ai.SC002_GM001250	47.1	1.4e-141	PHI:6360	A0A0U1YUA0	flgK	553	Pantoea ananatis	no data found	Allium cepa (related: onion)	Flagellar motility	Gene mutation; gene complementation	reduced virulence
Ai.SC002_GM001254	40	7.7e-86	PHI:6261	G4YQK3	PsAAT3	67593	Phytophthora sojae	soybean stem and root rot	Glycine max (related: soybean)	Aspartate aminotransferase	altered gene expression / gene regulation: silencing	reduced virulence
Ai.SC002_GM001255	61.8	1.7e-130	PHI:9530	J9QY50	ompk36	573	Klebsiella pneumoniae	pneumonia	Mus musculus (related: house mouse)	Porin	Gene mutation	reduced virulence
Ai.SC002_GM001271	43.1	2.1e-84	PHI:5467	A3N3I4	LonC	715	Actinobacillus pleuropneumoniae	Lung Infections	Mus musculus (related: house mouse)	Lon proteases	gene mutation	unaffected pathogenicity
Ai.SC002_GM001273	71.5	5.6e-141	PHI:4160	B5XY48	OmpA2	573	Klebsiella pneumoniae	Pneumonia	Galleria mellonella (related: greater wax moth)	outer membrane proteins	gene mutation	reduced virulence
Ai.SC002_GM001289	72.6	8e-165	PHI:7949	A6TFA0	arnB	573	Klebsiella pneumoniae	pneumonia	Galleria mellonella (related: Greater wax moth)	Putative aminotransferase	Gene mutation	unaffected pathogenicity
Ai.SC002_GM001290	80	1.7e-144	PHI:7950	A6TF99	arnC	573	Klebsiella pneumoniae	pneumonia	Galleria mellonella (related: Greater wax moth)	Putative sugar transferase	Gene mutation	unaffected pathogenicity
Ai.SC002_GM001291	79.4	0	PHI:7951	A6TF98	arnA	573	Klebsiella pneumoniae	pneumonia	Galleria mellonella (related: Greater wax moth)	Hypothetical protein	Gene mutation	unaffected pathogenicity
Ai.SC002_GM001292	68.5	8.5e-122	PHI:7952	A6TF97	arnD	573	Klebsiella pneumoniae	pneumonia	Galleria mellonella (related: Greater wax moth)	Hypothetical protein	Gene mutation	unaffected pathogenicity
Ai.SC002_GM001293	60	2.9e-200	PHI:7953	A6TF96	arnT	573	Klebsiella pneumoniae	pneumonia	Galleria mellonella (related: Greater wax moth)	4-Amino-4-deoxy-L-arabinose transferase	Gene mutation	unaffected pathogenicity
Ai.SC002_GM001294	56.5	1.8e-29	PHI:7954	A6TF95	arnE	573	Klebsiella pneumoniae	pneumonia	Galleria mellonella (related: Greater wax moth)	Hypothetical protein	Gene mutation	unaffected pathogenicity
Ai.SC002_GM001295	51.2	1.3e-23	PHI:7955	A6TF94	arnF	573	Klebsiella pneumoniae	pneumonia	Galleria mellonella (related: Greater wax moth)	Hypothetical protein	Gene mutation	unaffected pathogenicity
Ai.SC002_GM001297	71.6	9.7e-24	PHI:7262	P0A9Y9	cspC	28901	Salmonella enterica	Salmonellosis	Mus musculus (related: house mouse)	Cold shock protein	gene deletion: full	unaffected pathogenicity
Ai.SC002_GM001299	43.6	8e-135	PHI:3781	D0ZEM2	inv	636	Edwardsiella tarda	No Data Found	Danio rerio (related: zebrafish)	required to initiate the internalization of a bacterium into the host organism	gene deletion; gene complementation	reduced virulence
Ai.SC002_GM001309	44.4	4.9e-19	PHI:10117	Q7CQM8	STM14_RS07790 (ttrR)	28901	Salmonella enterica	Infections	Lactuca sativa (related: garden lettuce)	Two-component system response regulator	Gene deletion: full	reduced virulence
Ai.SC002_GM001323	77	5.5e-45	PHI:4075	L0MK13	flhD	615	Serratia marcescens	Hemolymph Bleeding	Bombyx mori (related: domestic silkworm)	virulence factor	gene disruption	unaffected pathogenicity
Ai.SC002_GM001324	77.7	5.4e-85	PHI:8572	E0SIM9	flhC (Dda3937_02784)	204038	Dickeya dadantii	Soft rot disease	Cichorium intybus (related: chicory)	Flagellar transcriptional activator	gene deletion: full	reduced virulence
Ai.SC002_GM001325	80.2	5.1e-135	PHI:6361	A0A0E9B8Z9	motA	553	Pantoea ananatis	no data found	Allium cepa (related: onion)	Flagellar motility	Gene mutation; gene complementation	reduced virulence
Ai.SC002_GM001326	63.3	4.4e-103	PHI:6534	P0AF06	motB	562	Escherichia coli	meningitis	Anas platyrhynchos (related: mallard)	Motility protein	Gene mutation	reduced virulence
Ai.SC002_GM001327	71	4.2e-265	PHI:6535	P07363	cheA	562	Escherichia coli	meningitis	Anas platyrhynchos (related: mallard)	Chemotaxis protein	Gene mutation	unaffected pathogenicity
Ai.SC002_GM001328	86	5.6e-75	PHI:6536	P0A964	cheW	562	Escherichia coli	meningitis	Anas platyrhynchos (related: mallard)	Chemotaxis protein	Gene mutation	unaffected pathogenicity
Ai.SC002_GM001329	70.6	6.7e-213	PHI:6981	A0A0F6BB74	tsr	28901	Salmonella enterica	Salmonellosis	Homo sapiens (related: human)	Methyl-accepting chemotaxis protein	gene deletion: full	reduced virulence
Ai.SC002_GM001330	54.2	7.2e-140	PHI:6981	A0A0F6BB74	tsr	28901	Salmonella enterica	Salmonellosis	Homo sapiens (related: human)	Methyl-accepting chemotaxis protein	gene deletion: full	reduced virulence
Ai.SC002_GM001332	83.7	3.9e-166	PHI:6461	P04042	cheB	28901	Salmonella enterica	Salmonellosis	Mus musculus (related: house mouse)	Chemotaxis	Gene mutation	reduced virulence
Ai.SC002_GM001333	86	2e-59	PHI:8732__PHI:10049	NA
Ai.SC002_GM001334	78.7	2.6e-88	PHI:10050	P07800	chez	28901	Salmonella enterica	Salmonellosis	Mus musculus (related: house mouse)	Chemotaxis regulator protein	Gene mutation; gene complementation	reduced virulence
Ai.SC002_GM001341	42.9	2.4e-42	PHI:8756	P26976	phoN	28901	Salmonella enterica	Salmonellosis	Dictyostelium discoideum (related: amoeba)	Non-specific acid phosphatase	Gene mutation	unaffected pathogenicity
Ai.SC002_GM001349	42.3	3.3e-72	PHI:6510__PHI:7620	NA
Ai.SC002_GM001354	96.1	2.7e-87	PHI:10179	A0A0D6I594	tnpA	28901	Salmonella enterica	salmonellosis	Homo sapiens (related: human)	Regulatory RNA/ transposase for IS200	Gene deletion: full	increased virulence (hypervirulence)
Ai.SC002_GM001359	55.6	6.2e-99	PHI:4732	Q5NH02	FTT0673p/prsAp	263	Francisella tularensis	Tularemia	Mus musculus (related: house mouse)	ribose phosphate pyrophosphokinase	gene mutation	unaffected pathogenicity
Ai.SC002_GM001363	50.8	8.2e-103	PHI:9821	Q8Y4A8	prfA (lmo2543)	1639	Listeria monocytogenes	Listeriosis	Homo sapiens (related: human)	Peptide chain release factor 1	Gene deletion: full	reduced virulence
Ai.SC002_GM001398	84.1	3.2e-117	PHI:5013	A0A0H3B439	znuB	633	Yersinia pseudotuberculosis	Gut-Associated Diseases, Such As Diarrhoea, Enteritis And Colitis	Mus musculus (related: house mouse)	Zinc transporter	gene mutation; gene complementation	reduced virulence
Ai.SC002_GM001401	70.2	4.6e-174	PHI:4185	Q0WF94	ypo2062	632	Yersinia pestis	Bubonic Plague	Mus musculus (related: house mouse)	putative DNA binding protein	gene deletion: partial; gene complementation	reduced virulence
Ai.SC002_GM001408	53.7	4.8e-180	PHI:6698	A0A0H6NEI3	edd	666	Vibrio cholerae	cholera	Oryctolagus cuniculus (related: rabbit)	6-Phosphogluconate dehydratase	Gene mutation; gene complementation	reduced virulence
Ai.SC002_GM001409	42.5	2.5e-43	PHI:6699	A0A0H6T2F5	eda	666	Vibrio cholerae	cholera	Oryctolagus cuniculus (related: rabbit)	2-Keto-3-deoxy-6-phosphogluconate aldolase	Gene mutation; gene complementation	reduced virulence
Ai.SC002_GM001411	72.1	5.8e-38	PHI:8966	A0A1C1TY69	mdtJ	573	Klebsiella pneumoniae	pneumonia	Mus musculus (related: house mouse)	Multidrug transporter subunit	Gene deletion: full	reduced virulence
Ai.SC002_GM001412	76.1	1.7e-43	PHI:8967	B5XR94	mdtI	573	Klebsiella pneumoniae	pneumonia	Mus musculus (related: house mouse)	Multidrug resistance protein	Gene deletion: full	reduced virulence
Ai.SC002_GM001415	54.9	2.2e-69	PHI:6870	A0A165G9C3	yeaZ	669	Vibrio harveyi	luminous vibriosis	Danio rerio (related: zebrafish)	Resuscitation-promoting factor	Gene disruption	reduced virulence
Ai.SC002_GM001416	43.1	1.2e-33	PHI:9256	P37194	slp	562	Escherichia coli	Urinary tract infections	Homo sapiens (related: human)	Carbon starvation-inducible lipoprotein	Gene deletion: full; gene complementation	reduced virulence
Ai.SC002_GM001417	74.5	9e-250	PHI:4108	A5F6S0	fadD	666	Vibrio cholerae	Cholera	Oryctolagus cuniculus (related: rabbit)	encoding a long-chain fatty acyl coenzyme A (acyl-CoA) ligase	gene disruption	unaffected pathogenicity
Ai.SC002_GM001430	51.8	1.6e-70	PHI:6702	A5F6Z2	gntR	666	Vibrio cholerae	cholera	Oryctolagus cuniculus (related: rabbit)	Regulatory molecule	Gene mutation; gene complementation	reduced virulence
Ai.SC002_GM001450	47.5	1.1e-80	PHI:6904	P0A038	GAPDH	1280	Staphylococcus aureus	white muscardine disease	Galleria mellonella (related: Greater wax moth)	Glyceraldehyde-3-phosphate dehydrogenase	Functional test in host: direct injection	reduced virulence
Ai.SC002_GM001451	46.7	1.8e-22	PHI:4582	P0A088	msrB	1280	Staphylococcus aureus	Skin Infections; Food Poisoning; Respiratory Diseases	Mus musculus (related: house mouse)	Methionine Sulfoxide Reductase	gene mutation; gene complementation	reduced virulence
Ai.SC002_GM001464	46.8	2.6e-19	PHI:8652	P08179	purN	562	Escherichia coli	Infections	Homo sapiens (related: human)	Phosphoribosylglycinamide formyltransferase	Gene deletion: full; gene complementation	unaffected pathogenicity
Ai.SC002_GM001466	53.6	8e-103	PHI:2679	Q7CQF1	hnr	28901	Salmonella enterica	Food Poisoning	Mus musculus (related: house mouse)	Regulators of systemic infection	gene deletion: full; gene complementation	reduced virulence
Ai.SC002_GM001467	46.3	5.7e-56	PHI:3112	Q8P8Q1	galU	339	Xanthomonas campestris	Black Rot Disease	Brassica oleracea (no common name found)	Uridine triphosphate (UTP)-glucose-1-phosphate uridylyltransferase	gene mutation: characterised; gene complementation	loss of pathogenicity
Ai.SC002_GM001468	89.7	5.9e-62	PHI:6097	A6TAK8	hns	573	Klebsiella pneumoniae	Pneumonia	Mus musculus (related: house mouse)	pleiotropic regulator	gene mutation; gene complementation	increased virulence (hypervirulence)
Ai.SC002_GM001471	45.8	2.1e-216	PHI:8932	A0A116Q7Z1	adhE	1307	Streptococcus suis	Meningitis	Homo sapiens (related: human)	Acetaldehyde-CoA/alcohol dehydrogenase	gene deletion: full	reduced virulence
Ai.SC002_GM001473	40.3	3.9e-96	PHI:9130	Q2YKG0	bab2_0700	235	Brucella abortus	brucellosis	Mus musculus (related: house mouse)	ABC transporter periplasmic binding protein	Gene disruption; gene complementation	reduced virulence
Ai.SC002_GM001476	48.3	2.4e-69	PHI:7820	H7C7Q3	oppD (bb0334)	139	Borreliella burgdorferi	Lyme disease	Mus musculus (related: house mouse)	Oligopepeptide (Opp) transporter that drives transport by hydrolyzing ATP	Gene mutation; Chemical complementation	reduced virulence
Ai.SC002_GM001477	47.4	1.3e-70	PHI:7821	H7C7L2	oppF (bb0335)	139	Borreliella burgdorferi	Lyme disease	Mus musculus (related: house mouse)	Oligopepeptide (Opp) transporter that drives transport by hydrolyzing ATP	Gene mutation; Chemical complementation	reduced virulence
Ai.SC002_GM001493	83.6	8.2e-197	PHI:9321	D4I3E6	trpB	552	Erwinia amylovora	Fire blight	Malus domestica (related: apple)	Tryptophan synthase beta chain	gene mutation	reduced virulence
Ai.SC002_GM001494	40.9	6.9e-38	PHI:9984	B2SL03	trpC (PXO_04004)	347	Xanthomonas oryzae	bacterial leaf blight	Oryza sativa (related: rice)	Indole-3-glycerol phosphate synthase	Gene deletion: full; gene complementation	reduced virulence
Ai.SC002_GM001496	45.3	1.7e-36	PHI:3941	Q4UZG1	XC_0481	339	Xanthomonas campestris	Black Rot Disease	Raphanus sativus (related: radish)	Anthranilate synthase component II	gene mutation	reduced virulence
Ai.SC002_GM001501	51.4	1.3e-56	PHI:8622	Q9K034	ctp (NMB0788)	487	Neisseria meningitidis	septicemia	Homo sapiens (related: human)	Cysteine transporter permease	Other evidence: ectopic complementation	unaffected pathogenicity
Ai.SC002_GM001502	48.6	1.4e-59	PHI:8621	Q9K035	cbp (NMB0787)	487	Neisseria meningitidis	septicemia	Homo sapiens (related: human)	Cysteine-binding protein	Other evidence: ectopic complementation	unaffected pathogenicity
Ai.SC002_GM001504	63.9	1.2e-40	PHI:8505	Q7CHU5	BfvR (YPO1737)	632	Yersinia pestis	pneumonic plague	Caenorhabditis elegans (related: roundworm)	AraC-family transcriptional regulator	Gene deletion: full; gene complementation	reduced virulence
Ai.SC002_GM001515	64.1	2.3e-120	PHI:8764	G3XCU6	cysB	287	Pseudomonas aeruginosa	Infections	Mus musculus (related: house mouse)	LysR-type transcriptional regulator	Gene deletion: full; gene complementation	reduced virulence
Ai.SC002_GM001516	95.7	4.5e-34	PHI:7262	P0A9Y9	cspC	28901	Salmonella enterica	Salmonellosis	Mus musculus (related: house mouse)	Cold shock protein	gene deletion: full	unaffected pathogenicity
Ai.SC002_GM001523	50.6	3.6e-67	PHI:3118	Q882D7	PSPTO_2691	317	Pseudomonas syringae	Bacterial Speck Of Tomato	Nicotiana tabacum (related: common tobacco)	Membrane protein, TerC family	gene mutation	unaffected pathogenicity
Ai.SC002_GM001531	83	2e-119	PHI:4175	U6ZHA8	kdgR	1089444	Dickeya solani	Soft Rot	Solanum tuberosum (related: potato)	virulence negative regulators	gene mutation	unaffected pathogenicity
Ai.SC002_GM001563	44.5	7.6e-66	PHI:3282	Q4USG7	NagZ	339	Xanthomonas campestris	Black Rot Disease	Brassica oleracea (no common name found)	b-lactamase induction	gene disruption; gene complementation	reduced virulence
Ai.SC002_GM001565	43.1	5.2e-70	PHI:6322	A0A0B7MDN1	potD	1313	Streptococcus pneumoniae	Pneumococcal pneumonia	Mus musculus (related: house mouse)	ABC transporter ATP-binding protein - spermidine/putrescine transport	Gene mutation	reduced virulence
Ai.SC002_GM001569	51.2	9.9e-75	PHI:6319	Q8DPC2	potA	1313	Streptococcus pneumoniae	Pneumococcal pneumonia	Mus musculus (related: house mouse)	ABC transporter ATP-binding protein - spermidine/putrescine transport	Gene mutation	reduced virulence
Ai.SC002_GM001585	52	1.3e-57	PHI:9011	A0A0K0GFV0	PXO_RS01340	347	Xanthomonas oryzae	bacterial leaf blight	Oryza sativa (related: rice)	Response regulator	Gene mutation	unaffected pathogenicity
Ai.SC002_GM001586	79.5	1.5e-91	PHI:7657	A0A0F6B1X1	pspA	28901	Salmonella enterica	salmonellosis	Mus musculus (related: house mouse)	Phage-shock protein	Gene mutation; Gene complementation	unaffected pathogenicity
Ai.SC002_GM001587	73	1.4e-25	PHI:7658	A0A0F6B1X0	pspB	28901	Salmonella enterica	salmonellosis	Mus musculus (related: house mouse)	Phage-shock protein	Gene mutation; Gene complementation	reduced virulence
Ai.SC002_GM001588	50	9.4e-24	PHI:7659	A0A0F6B1W9	pspC	28901	Salmonella enterica	salmonellosis	Mus musculus (related: house mouse)	Phage-shock protein	Gene mutation; Gene complementation	unaffected pathogenicity
Ai.SC002_GM001592	55.6	1.3e-82	PHI:609__PHI:616	NA
Ai.SC002_GM001635	45.3	3.1e-82	PHI:7752	P96354	rv3115	1773	Mycobacterium tuberculosis	tuberculosis	Mus musculus (related: house mouse)	Involved in hypoxia-responsive molybdenum cofactor biosynthesis	Gene deletion: full; gene complementation	unaffected pathogenicity
Ai.SC002_GM001645	79.1	2.5e-241	PHI:4563	Q0WEH7	TyrR	632	Yersinia pestis	Plague	Mus musculus (related: house mouse)	regulator of aromatic amino acid metabolism	gene deletion: full; gene complementation	reduced virulence
Ai.SC002_GM001648	53.8	2.7e-89	PHI:10104	A0A0F6B0W9	STM14_RS07730 (ynhG)	28901	Salmonella enterica	Infections	Lactuca sativa (related: garden lettuce)	Murein L,D-transpeptidase	Gene deletion: full	reduced virulence
Ai.SC002_GM001649	91	8.7e-34	PHI:10106	A0A0F6B0X1	STM14_RS07740 (lpp)	28901	Salmonella enterica	Infections	Lactuca sativa (related: garden lettuce)	Murein lipoprotein	Gene deletion: full	reduced virulence
Ai.SC002_GM001650	89.6	4.6e-239	PHI:3134	Q66A26	pykF	633	Yersinia pseudotuberculosis	Gut-Associated Diseases; Diarrhoea; Enteritis; Colitis	Mus musculus (related: house mouse)	Part of the pyruvate - tricarboxylic acid cycle node	gene disruption	reduced virulence
Ai.SC002_GM001658	47.5	4.7e-33	PHI:10115	A0A0F6B0X9	STM14_RS07780 (ttrB)	28901	Salmonella enterica	Infections	Lactuca sativa (related: garden lettuce)	Tetrathionate reductase subunit B	Gene deletion: full	reduced virulence
Ai.SC002_GM001661	53	1.3e-51	PHI:9496	A0A0H3NC59	yeaB	28901	Salmonella enterica	infection	Mus musculus (related: house mouse)	RNA methyltransferase	Gene mutation; gene complementation	reduced virulence
Ai.SC002_GM001664	70.7	4.2e-150	PHI:8653	P33221	purT	562	Escherichia coli	Infections	Homo sapiens (related: human)	Formate-dependent phosphoribosylglycinamide formyltransferase	Gene deletion: full; gene complementation	unaffected pathogenicity
Ai.SC002_GM001665	47.7	6.3e-101	PHI:2643	A4HTK3	CFAS	5671	Leishmania infantum	Leishmaniasis	Mus musculus (related: house mouse)	Cyclopropane fatty acid synthetase	gene deletion: full; gene complementation	reduced virulence
Ai.SC002_GM001667	79.7	3.4e-27	PHI:7262	P0A9Y9	cspC	28901	Salmonella enterica	Salmonellosis	Mus musculus (related: house mouse)	Cold shock protein	gene deletion: full	unaffected pathogenicity
Ai.SC002_GM001673	64.6	2.2e-138	PHI:2872	Q48473	ompK36	573	Klebsiella pneumoniae	Pneumonia	Mus musculus (related: house mouse)	Outer membrane protein	gene mutation	reduced virulence
Ai.SC002_GM001679	40.5	5.6e-12	PHI:9521	A0A0H3NC74	yobH (SL1344_1770)	28901	Salmonella enterica	gastroenteritis	Mus musculus (related: house mouse)	Invasion factor	Gene mutation; gene complementation	reduced virulence
Ai.SC002_GM001688	43.2	8.4e-12	PHI:8676	Q8NL12	hupB (XAC1081)	346	Xanthomonas citri	citrus canker	Citrus limon (related: lemon)	Histone-like protein	Gene mutation; gene complementation	reduced virulence
Ai.SC002_GM001695	68.2	4.6e-95	PHI:7909	Q66FK0	hmuV	633	Yersinia pseudotuberculosis	zoonotic infection	Ovis aries (related: sheep)	ABC hemin transporter, permease subunit	gene deletion: full	unaffected pathogenicity
Ai.SC002_GM001696	69.3	6.2e-121	PHI:7908	Q66FJ9	hmuU	633	Yersinia pseudotuberculosis	zoonotic infection	Ovis aries (related: sheep)	Hemin import ATP-binding protein	gene deletion: full	unaffected pathogenicity
Ai.SC002_GM001697	61.8	3.4e-88	PHI:7907	Q66FJ8	hmuT	633	Yersinia pseudotuberculosis	zoonotic infection	Ovis aries (related: sheep)	ABC transporter, periplasmic hemin-binding protein	gene deletion: full	unaffected pathogenicity
Ai.SC002_GM001698	62.4	1.5e-122	PHI:7906	Q66FJ7	hmuS	633	Yersinia pseudotuberculosis	zoonotic infection	Ovis aries (related: sheep)	Possible hemin degradation/transport protein	gene deletion: full	unaffected pathogenicity
Ai.SC002_GM001699	58.5	1.5e-230	PHI:7905	Q66FJ6	hmuR	633	Yersinia pseudotuberculosis	zoonotic infection	Ovis aries (related: sheep)	Outer membrane hemin receptor	gene deletion: full	unaffected pathogenicity
Ai.SC002_GM001704	55.2	6.7e-110	PHI:8884	Q8XW15	aroG1	305	Ralstonia solanacearum	Bacterial wilt	Nicotiana tabacum (related: common tobacco)	Phospho-2-dehydro-3-deoxyheptonate aldolase	Gene deletion: full; gene complementation	loss of pathogenicity
Ai.SC002_GM001709	60.3	2.2e-43	PHI:6270	Q8XBU9	ybdB	562	Escherichia coli	Urinary tract infections	Mus musculus (related: house mouse)	Proofreading thioesterase	Gene mutation	lethal
Ai.SC002_GM001713	51.9	4e-50	PHI:10064	A0A0F6B5Q6	STM14_RS15255	28901	Salmonella enterica	Infections	Lactuca sativa (related: garden lettuce)	Hypothetical protein	Gene deletion: full	unaffected pathogenicity
Ai.SC002_GM001715	40.8	5.4e-13	PHI:8967	B5XR94	mdtI	573	Klebsiella pneumoniae	pneumonia	Mus musculus (related: house mouse)	Multidrug resistance protein	Gene deletion: full	reduced virulence
Ai.SC002_GM001716	42.2	7.3e-22	PHI:3668__PHI:4693__PHI:4698__PHI:9435	NA
Ai.SC002_GM001732	73.2	2.1e-94	PHI:9601	A0A0E1M219	RstA	562	Escherichia coli	infections	Homo sapiens (related: human)	Two-component response regulator	Gene deletion: full; gene complementation	reduced virulence
Ai.SC002_GM001736	66.1	1.9e-116	PHI:3780	D0ZX10	sssB	28901	Salmonella enterica	Self-Limiting Gastroenteritis In Humans And A Typhoid-Like Disease In Mice	Mus musculus (related: house mouse)	Secreted effector protein	gene mutation; gene complementation	effector (plant avirulence determinant)
Ai.SC002_GM001740	93.9	1.9e-130	PHI:4876__PHI:7248	NA
Ai.SC002_GM001747	51.2	6.2e-83	PHI:6980	A0A0F6B845	tcp	28901	Salmonella enterica	Salmonellosis	Homo sapiens (related: human)	Methyl-accepting chemotaxis protein	gene deletion: full	reduced virulence
Ai.SC002_GM001748	51.5	3.5e-36	PHI:9256	P37194	slp	562	Escherichia coli	Urinary tract infections	Homo sapiens (related: human)	Carbon starvation-inducible lipoprotein	Gene deletion: full; gene complementation	reduced virulence
Ai.SC002_GM001755	51.2	7.5e-63	PHI:7511	A0A076ZHT9	VK055_1961	573	Klebsiella pneumoniae	pneumonia	Mus musculus (related: house mouse)	Serine 3-dehydrogenase	gene deletion: full	unaffected pathogenicity
Ai.SC002_GM001773	76.1	7.2e-27	PHI:4179	U6ZHS1	expI	1089444	Dickeya solani	Soft Rot	Solanum tuberosum (related: potato)	synthesis and perception of signaling molecules	gene mutation	reduced virulence
Ai.SC002_GM001776	40.7	2.1e-36	PHI:8941	Q9HZL0	nqrE (PA2995)	287	Pseudomonas aeruginosa	nosocomial infections	Lactuca sativa (related: garden lettuce)	Na(+)-translocating NADH-quinone reductase	Gene deletion: full; gene complementation	unaffected pathogenicity
Ai.SC002_GM001781	40	2e-33	PHI:8942	Q9HZK9	nqrD (PA2996)	287	Pseudomonas aeruginosa	nosocomial infections	Lactuca sativa (related: garden lettuce)	Na(+)-translocating NADH-quinone reductase	Gene deletion: full; gene complementation	unaffected pathogenicity
Ai.SC002_GM001789	74	2.3e-37	PHI:4981	D0Z7V7	mliC	636	Edwardsiella tarda	Hemorrhagic Septicemia	Scophthalmus maximus (related: turbot)	Lysozyme Inhibitor	gene mutation; gene complementation	reduced virulence
Ai.SC002_GM001792	79.1	8.7e-55	PHI:6114	P69988	RovA	632	Yersinia pestis	Plague	Mus musculus (related: house mouse)	MarR-family regulator	gene deletion: full	reduced virulence
Ai.SC002_GM001798	50.8	5.6e-50	PHI:9094	O02616	Fe-SODB	5693	Trypanosoma cruzi	Chagas disease	Mus musculus (related: house mouse)	Iron superoxide dismutase B	altered gene expression / gene regulation: overexpression	increased virulence (hypervirulence)
Ai.SC002_GM001805	48.2	6e-104	PHI:2643	A4HTK3	CFAS	5671	Leishmania infantum	Leishmaniasis	Mus musculus (related: house mouse)	Cyclopropane fatty acid synthetase	gene deletion: full; gene complementation	reduced virulence
Ai.SC002_GM001810	45.5	2e-53	PHI:5423	Q8YG33	BMEI1329	29459	Brucella melitensis	Ovine Brucellosis	Mus musculus (related: house mouse)	Two-component response regulator	gene deletion: full; gene complementation	reduced virulence
Ai.SC002_GM001815	48.3	1.6e-260	PHI:7999	Q9I5F6	putA	287	Pseudomonas aeruginosa	Pneumonia	Mus musculus (related: house mouse)	Bifunctional enzyme which converts proline to glutamate	Gene deletion: full; gene complementation	reduced virulence
Ai.SC002_GM001817	69.6	1.8e-292	PHI:9246	Q8Z2C1	malS	28901	Salmonella enterica	Salmonellosis	Homo sapiens (related: human)	Regulatory non-coding RNA	altered gene expression / gene regulation: overexpression	reduced virulence
Ai.SC002_GM001819	75.2	9.5e-294	PHI:9896	P23865	Prc	562	Escherichia coli	urinary tract infection	Mus musculus (related: house mouse)	Tail-specific protease	Gene mutation; gene complementation	reduced virulence
Ai.SC002_GM001820	66	4.2e-76	PHI:8783	P60317	ProQ	28901	Salmonella enterica	Salmonellosis	Mus musculus (related: house mouse)	RNA chaperone	Gene mutation; gene complementation	reduced virulence
Ai.SC002_GM001824	54.7	0	PHI:10113	A0A0F6B0X7	STM14_RS07770 (ttrA)	28901	Salmonella enterica	Infections	Lactuca sativa (related: garden lettuce)	Tetrathionate reductase subunit A	Gene deletion: full	reduced virulence
Ai.SC002_GM001826	61.6	5.5e-85	PHI:10115	A0A0F6B0X9	STM14_RS07780 (ttrB)	28901	Salmonella enterica	Infections	Lactuca sativa (related: garden lettuce)	Tetrathionate reductase subunit B	Gene deletion: full	reduced virulence
Ai.SC002_GM001828	44.2	6.3e-39	PHI:10117	Q7CQM8	STM14_RS07790 (ttrR)	28901	Salmonella enterica	Infections	Lactuca sativa (related: garden lettuce)	Two-component system response regulator	Gene deletion: full	reduced virulence
Ai.SC002_GM001909	44.4	1.3e-28	PHI:3751	D0ZLQ3	cigR	28901	Salmonella enterica	Self-Limiting Gastroenteritis In Humans And A Typhoid-Like Disease In Mice	Mus musculus (related: house mouse)	Anti virulence factor	gene mutation; gene complementation	increased virulence (hypervirulence)
Ai.SC002_GM001911	42.4	3.5e-19	PHI:6509	Q9A121	gloA	1314	Streptococcus pyogenes	Infections	Mus musculus (related: house mouse)	glyoxylase I (S-lactoylglutathione lyase)	gene deletion: full; gene complementation	reduced virulence
Ai.SC002_GM001930	68.4	1.1e-45	PHI:10081	A0A0F6B5S6	STM14_RS15340	28901	Salmonella enterica	Infections	Lactuca sativa (related: garden lettuce)	Iron ABC transporter substrate-binding protein	Gene deletion: full	unaffected pathogenicity
Ai.SC002_GM001947	41.9	6.9e-69	PHI:6556	Q4X256	mecA	746128	Aspergillus fumigatus	Invasive pulmonary aspergillosis	Mus musculus (related: house mouse)	Cystathionine-beta -synthase	gene deletion: full	reduced virulence
Ai.SC002_GM001948	61.4	1.1e-129	PHI:9986	A0A0K0GQB7	metB (PXO_03157)	347	Xanthomonas oryzae	bacterial leaf blight	Oryza sativa (related: rice)	Cystathionine gamma-synthase (CGS) (O-succinylhomoserine(Thiol)-lyase)	Gene deletion: full; gene complementation	reduced virulence
Ai.SC002_GM001966	40.1	3.1e-49	PHI:6319	Q8DPC2	potA	1313	Streptococcus pneumoniae	Pneumococcal pneumonia	Mus musculus (related: house mouse)	ABC transporter ATP-binding protein - spermidine/putrescine transport	Gene mutation	reduced virulence
Ai.SC002_GM001975	52.9	2.4e-142	PHI:3914	Q0V515	Sdh1	13684	Parastagonospora nodorum	Stagonospora Nodorum Blotch	Triticum aestivum (related: bread wheat)	encodes succinic semialdehyde dehydrogenase	gene disruption; gene complementation	reduced virulence
Ai.SC002_GM001979	42.7	3.8e-103	PHI:7788	Q882F5	AldB (PSPTO_2673)	317	Pseudomonas syringae	bacterial speck of tomato	Arabidopsis thaliana (related: thale cress)	Indole-3-acetaldehyde dehydrogenase	Gene disruption	reduced virulence
Ai.SC002_GM001980	40.1	2.1e-36	PHI:9188	A0A0H3LPR7	BB_RS07570 (BB1518)	518	Bordetella bronchiseptica	infectious bronchitis	Rattus rattus (related: black rat)	Putative hydrolase	gene mutation	unaffected pathogenicity
Ai.SC002_GM001998	78.9	3.2e-205	PHI:10048	Q8ZPL7	fumC	28901	Salmonella enterica	Salmonellosis	Mus musculus (related: house mouse)	Fumarate hydratase class II	Gene mutation; gene complementation	reduced virulence
Ai.SC002_GM002003	42.1	1e-64	PHI:3475	Q97NA2	arcC	1313	Streptococcus pneumoniae	Pneumococcal Pneumonia	Mus musculus (related: house mouse)	Part of the arginine deiminase system	gene deletion: full; gene complementation	reduced virulence
Ai.SC002_GM002019	40.1	9.7e-46	PHI:6849	D7FDG3	niuD	210	Helicobacter pylori	gastric infections	Mus musculus (related: house mouse)	ABC transporter	Gene deletion: full; gene complementation	reduced virulence
Ai.SC002_GM002034	55.3	4.5e-38	PHI:2648	P76002	pliG	562	Escherichia coli	Colibacillosis; Cellulitis; Swollen Head Syndrome	Gallus gallus (related: chicken)	Lysozyme inhibitor	gene deletion: full; gene complementation	unaffected pathogenicity
Ai.SC002_GM002052	44.6	8.1e-57	PHI:6849	D7FDG3	niuD	210	Helicobacter pylori	gastric infections	Mus musculus (related: house mouse)	ABC transporter	Gene deletion: full; gene complementation	reduced virulence
Ai.SC002_GM002065	43.7	7.5e-93	PHI:9014	A0A0K0GGF6	PXO_RS02690	347	Xanthomonas oryzae	bacterial leaf blight	Oryza sativa (related: rice)	Response regulator	Gene mutation	unaffected pathogenicity
Ai.SC002_GM002069	46.2	6e-83	PHI:2529	Q4WCL5	ERG10	746128	Aspergillus fumigatus	Invasive Pulmonary Aspergillosis	Lethal pathogen phenotype	Acetyl-CoA acetyl-transferase	altered gene expression / gene regulation	lethal
Ai.SC002_GM002077	41.2	2.1e-66	PHI:6524	O51369	fruA1	139	Borreliella burgdorferi	Lyme disease	Mus musculus (related: house mouse)	Pts system, fructose-specific iiabc component	Gene mutation	unaffected pathogenicity
Ai.SC002_GM002078	40.1	9.4e-91	PHI:9312	D4HXP6	ptsI	552	Erwinia amylovora	Fire blight	Malus domestica (related: apple)	Phosphoenolpyruvate-protein phosphotransferase	gene mutation	reduced virulence
Ai.SC002_GM002085	83.6	2.2e-86	PHI:560	P96058	sirA	28901	Salmonella enterica	Gastroenteritis	Mus musculus (related: house mouse)	no data found	other evidence	reduced virulence
Ai.SC002_GM002097	84.2	3.9e-103	PHI:7904	I3NI96	phoP	633	Yersinia pseudotuberculosis	zoonotic infection	Ovis aries (related: sheep)	Response regulator protein	Gene mutation	unaffected pathogenicity
Ai.SC002_GM002098	62.7	6.8e-169	PHI:4899__PHI:6318__PHI:7356	NA
Ai.SC002_GM002100	74.1	8.1e-122	PHI:8898	Q8ZFR1	cobB (Yp_1760)	632	Yersinia pestis	plague	Mus musculus (related: house mouse)	Protein deacetylase	Gene deletion: full; gene complementation	reduced virulence
Ai.SC002_GM002108	58.3	3e-136	PHI:8939	Q9HVN9	ndh (PA4538)	287	Pseudomonas aeruginosa	nosocomial infections	Lactuca sativa (related: garden lettuce)	NADH dehydrogenase	Gene deletion: full; gene complementation	unaffected pathogenicity
Ai.SC002_GM002125	47.8	6.1e-122	PHI:6309	A8Z3D6	glcB	1280	Staphylococcus aureus	skin infections; food poisoning; respiratory diseases	Mus musculus (related: house mouse)	Glucose uptake protein	Gene mutation; gene complementation	reduced virulence
Ai.SC002_GM002131	45.9	3e-98	PHI:724__PHI:730	NA
Ai.SC002_GM002132	51.3	5.8e-16	PHI:8556	O52658	Acp1 (PA1869)	287	Pseudomonas aeruginosa	nosocomial infections	Mus musculus (related: house mouse)	Acyl carrier protein	Gene deletion: full; gene complementation	increased virulence (hypervirulence)
Ai.SC002_GM002133	62.4	3.5e-81	PHI:5271	Q8Y0J2	fabG1	305	Ralstonia solanacearum	Bacterial Wilt	Solanum lycopersicum (related: tomato)	3-ketoacyl-acyl carrier protein reductase	gene disruption; gene complementation	lethal
Ai.SC002_GM002140	64.4	0	PHI:3723	E8XEV4	RNase E	28901	Salmonella enterica	Food Poisoning	Galleria mellonella (related: greater wax moth)	endoribonucleases	gene mutation; gene complementation	reduced virulence
Ai.SC002_GM002144	40.8	1.3e-25	PHI:5025	Q0GYW4	BceD	488447	Burkholderia contaminans	Cystic Fibrosis	Homo sapiens (related: human)	Tyrosine Kinase	gene mutation; gene complementation	reduced virulence
Ai.SC002_GM002145	49.4	1.5e-196	PHI:2471	Q46631	Ams	552	Erwinia amylovora	Fire Blight	Pyrus communis (related: pear)	Exopolysaccharides Amylovoran	gene deletion: full	loss of pathogenicity
Ai.SC002_GM002150	68.3	2.1e-132	PHI:9307	D4I0W8	pyrC	552	Erwinia amylovora	Fire blight	Malus domestica (related: apple)	Dihydroorotase	gene mutation	reduced virulence
Ai.SC002_GM002153	96.1	2.7e-87	PHI:10179	A0A0D6I594	tnpA	28901	Salmonella enterica	salmonellosis	Homo sapiens (related: human)	Regulatory RNA/ transposase for IS200	Gene deletion: full	increased virulence (hypervirulence)
Ai.SC002_GM002154	86.8	4.2e-284	PHI:10046	P40720	fumA	28901	Salmonella enterica	Salmonellosis	Mus musculus (related: house mouse)	Fumarate hydratase class I, aerobic	Gene mutation; gene complementation	reduced virulence
Ai.SC002_GM002156	53.4	6.8e-67	PHI:8623	Q9K033	cab (NMB0789)	487	Neisseria meningitidis	septicemia	Homo sapiens (related: human)	Cysteine ATP binding protein	Other evidence: ectopic complementation	unaffected pathogenicity
Ai.SC002_GM002157	49.7	5.7e-44	PHI:3922	N1NKQ7	FliZ	628	Xenorhabdus nematophila	No Data Found	Spodoptera littoralis (related: african cotton leafworm)	Global Regulatory Protein	gene mutation	reduced virulence
Ai.SC002_GM002159	84.5	4.9e-184	PHI:2642	D0Z9I9	FliC	636	Edwardsiella tarda	Edwardsiellosis	Danio rerio (related: zebrafish)	Flagellin Protein	gene deletion: full; gene complementation	reduced virulence
Ai.SC002_GM002160	96.1	2.7e-87	PHI:10179	A0A0D6I594	tnpA	28901	Salmonella enterica	salmonellosis	Homo sapiens (related: human)	Regulatory RNA/ transposase for IS200	Gene deletion: full	increased virulence (hypervirulence)
Ai.SC002_GM002161	97.4	1.4e-223	PHI:2642	D0Z9I9	FliC	636	Edwardsiella tarda	Edwardsiellosis	Danio rerio (related: zebrafish)	Flagellin Protein	gene deletion: full; gene complementation	reduced virulence
Ai.SC002_GM002162	43.2	1.8e-102	PHI:6733	P24216	fliD	562	Escherichia coli	urinary tract infection	Caenorhabditis elegans (related: roundworm)	Flagellar filament capping protein	Gene mutation; gene complementation	unaffected pathogenicity
Ai.SC002_GM002179	63.2	1.5e-146	PHI:6995	Q9I4N1	Flil	287	Pseudomonas aeruginosa	Opportunistic infections	Mus musculus (related: house mouse)	Flagellin	Gene mutation	reduced virulence
Ai.SC002_GM002180	53.6	9.8e-39	PHI:6463	P0A1K1	filj	28901	Salmonella enterica	Salmonellosis	Mus musculus (related: house mouse)	Flagellar protein	Gene mutation	reduced virulence
Ai.SC002_GM002186	40.6	2.8e-38	PHI:10149	A0A0F6B111	STM14_RS07950 (ssaR)	28901	Salmonella enterica	Infections	Lactuca sativa (related: garden lettuce)	Type III secretion system export apparatus protein	Gene deletion: full	reduced virulence
Ai.SC002_GM002204	73.9	1.3e-24	PHI:7262	P0A9Y9	cspC	28901	Salmonella enterica	Salmonellosis	Mus musculus (related: house mouse)	Cold shock protein	gene deletion: full	unaffected pathogenicity
Ai.SC002_GM002208	92.5	9.1e-46	PHI:2673	P64394	himD	28901	Salmonella enterica	Food Poisoning	Mus musculus (related: house mouse)	Regulators of systemic infection	gene deletion: full; gene complementation	reduced virulence
Ai.SC002_GM002211	75.5	4.4e-180	PHI:7061__PHI:8755	NA
Ai.SC002_GM002231	86.1	3.6e-225	PHI:6447	A0A164J6A6	rarA	573	Klebsiella pneumoniae	pneumonia	Caenorhabditis elegans (related: roundworm)	Holliday junction DNA helicase	gene deletion: full	reduced virulence
Ai.SC002_GM002234	98.2	1.5e-88	PHI:6497__PHI:7128	NA
Ai.SC002_GM002235	47.4	5.5e-74	PHI:2846	Q5RZ66	TRR1	5207	Cryptococcus neoformans	No Data Found	Lethal pathogen phenotype	Thioredoxin reductase	altered gene expression / gene regulation	lethal
Ai.SC002_GM002240	87.7	0	PHI:8569	E0SMW9	clpA (Dda3937_02363)	204038	Dickeya dadantii	Soft rot disease	Cichorium intybus (related: chicory)	ATP-dependent Clp protease ATP-binding subunit	gene deletion: full	reduced virulence
Ai.SC002_GM002241	73.6	1.5e-41	PHI:8568	E0SMW8	clpS	204038	Dickeya dadantii	Soft rot disease	Cichorium intybus (related: chicory)	ATP-dependent Clp protease adapter protein	gene deletion: full	reduced virulence
Ai.SC002_GM002242	53.7	1.4e-17	PHI:8639	A0A0K0GLJ4	CspD ( WP_003488188.1)	347	Xanthomonas oryzae	bacterial leaf blight	Oryza sativa (related: rice)	Uncharacterized protein	Gene deletion: full; gene complementation	unaffected pathogenicity
Ai.SC002_GM002243	44.8	7.1e-66	PHI:10177	P75829	ybjX	562	Escherichia coli	colibacillosis	Gallus gallus (related: chicken)	Uncharacterized protein	Gene mutation; gene complementation	reduced virulence
Ai.SC002_GM002244	40	2.1e-24	PHI:702	O68839	VcpD	666	Vibrio cholerae	Cholera	Mus musculus (related: house mouse)	Required for philus assembly and CT secretion	gene disruption	reduced virulence
Ai.SC002_GM002276	45.3	3.7e-51	PHI:8623	Q9K033	cab (NMB0789)	487	Neisseria meningitidis	septicemia	Homo sapiens (related: human)	Cysteine ATP binding protein	Other evidence: ectopic complementation	unaffected pathogenicity
Ai.SC002_GM002315	86	1.8e-143	PHI:5109	B5QZL1	prt	28901	Salmonella enterica	Colitis	Mus musculus (related: house mouse)	OAg biosynthesis	gene deletion: full; gene complementation	reduced virulence
Ai.SC002_GM002316	53.5	5.6e-122	PHI:9983	A0A0K0GKU8	hisD (PXO_00833)	347	Xanthomonas oryzae	bacterial leaf blight	Oryza sativa (related: rice)	Histidinol dehydrogenase	Gene deletion: full; gene complementation	reduced virulence
Ai.SC002_GM002318	52.3	7.4e-104	PHI:7790	G7TE30	HisB	347	Xanthomonas oryzae	rice bacterial blight	Oryza sativa (related: rice)	Bifunctional enzyme implicated in the imidazoleglycerol-phosphate dehydratase activity	Gene deletion: full; gene complementation	reduced virulence
Ai.SC002_GM002320	67.2	2.5e-95	PHI:9324	D4HW76	hisA	552	Erwinia amylovora	Fire blight	Nicotiana tabacum (related: common tobacco)	N-(5'-phospho-L-ribosyl-formimino)-5-amino-1-(5'-phosphoribosyl)-4-imidazolecarboxamide isomerase	gene mutation	unaffected pathogenicity
Ai.SC002_GM002328	44.1	7.3e-42	PHI:3953	Q4UU61	XC_2359	339	Xanthomonas campestris	Black Rot Disease	Raphanus sativus (related: radish)	Elongation factor P	gene mutation	reduced virulence
Ai.SC002_GM002331	44.8	7.8e-101	PHI:6980	A0A0F6B845	tcp	28901	Salmonella enterica	Salmonellosis	Homo sapiens (related: human)	Methyl-accepting chemotaxis protein	gene deletion: full	reduced virulence
Ai.SC002_GM002338	40.9	1.1e-93	PHI:6524	O51369	fruA1	139	Borreliella burgdorferi	Lyme disease	Mus musculus (related: house mouse)	Pts system, fructose-specific iiabc component	Gene mutation	unaffected pathogenicity
Ai.SC002_GM002344	52.8	6.3e-67	PHI:8623	Q9K033	cab (NMB0789)	487	Neisseria meningitidis	septicemia	Homo sapiens (related: human)	Cysteine ATP binding protein	Other evidence: ectopic complementation	unaffected pathogenicity
Ai.SC002_GM002352	73.1	7.3e-35	PHI:7469	C6DEJ2	RplY	554	Pectobacterium carotovorum	Soft rot disease	Brassica rapa (related: field mustard)	50S Ribosomal protein	Gene deletion: full; Gene complementation	reduced virulence
Ai.SC002_GM002358	96.1	2.7e-87	PHI:10179	A0A0D6I594	tnpA	28901	Salmonella enterica	salmonellosis	Homo sapiens (related: human)	Regulatory RNA/ transposase for IS200	Gene deletion: full	increased virulence (hypervirulence)
Ai.SC002_GM002367	40.7	2.9e-33	PHI:9020	A0A0K0GI78	PXO_RS06090	347	Xanthomonas oryzae	bacterial leaf blight	Oryza sativa (related: rice)	Response regulator	Gene mutation; gene complementation	reduced virulence
Ai.SC002_GM002369	74.7	0	PHI:4043	D4HXR8	AcrD	552	Erwinia amylovora	Fire Blight Disease	Pyrus communis (related: pear)	a resistance-nodulation-cell division (RND) transporter	gene disruption; gene complementation	unaffected pathogenicity
Ai.SC002_GM002387	46.2	9.2e-83	PHI:744	I1RFM6	ADE5	5518	Fusarium graminearum	Fusarium Ear Blight	Hordeum vulgare (related: barley)	Phosphoribosylamine-glycine ligase	gene deletion; gene complementation	reduced virulence
Ai.SC002_GM002388	63.6	1.5e-75	PHI:8652	P08179	purN	562	Escherichia coli	Infections	Homo sapiens (related: human)	Phosphoribosylglycinamide formyltransferase	Gene deletion: full; gene complementation	unaffected pathogenicity
Ai.SC002_GM002390	78.9	0	PHI:5063	B4EY92	ppk	584	Proteus mirabilis	Urinary Tract Infections	Mus musculus (related: house mouse)	Polyphosphate kinase	gene disruption; gene complementation	reduced virulence
Ai.SC002_GM002392	67.1	4.2e-170	PHI:9434	Q8ZRE1	phoR	28901	Salmonella enterica	gastroenteritis	Mus musculus (related: house mouse)	Histidine kinase	gene mutation: characterised	increased virulence (hypervirulence)
Ai.SC002_GM002393	58.3	1.2e-69	PHI:9000	A0A0K0GNX3	PXO_RS19870	347	Xanthomonas oryzae	bacterial leaf blight	Oryza sativa (related: rice)	Response regulator	Gene mutation	unaffected pathogenicity
Ai.SC002_GM002403	74.2	0	PHI:9198	W8ZK20	yegN	562	Escherichia coli	Urinary tract infections	Mus musculus (related: house mouse)	Multidrug efflux system subunit	Gene deletion: full	reduced virulence
Ai.SC002_GM002404	48.7	8.7e-267	PHI:9198	W8ZK20	yegN	562	Escherichia coli	Urinary tract infections	Mus musculus (related: house mouse)	Multidrug efflux system subunit	Gene deletion: full	reduced virulence
Ai.SC002_GM002406	41.9	1.1e-37	PHI:5466	Q9L524	SrrAB	1280	Staphylococcus aureus	Osteomyelitis	Mus musculus (related: house mouse)	Bacterial two component system, SrrAB, which is known to help S. aureussurvive in low oxygen	gene mutation	reduced virulence
Ai.SC002_GM002410	51.2	9.9e-56	PHI:8691	D2TUX9	dsbA (ROD_38991)	67825	Citrobacter rodentium	Colitis	Mus musculus (related: house mouse)	Thiol:disulfide interchange protein	Gene deletion: full; gene complementation	loss of pathogenicity
Ai.SC002_GM002411	100	6.3e-89	PHI:4148	D4F368	Ivy	636	Edwardsiella tarda	No Data Found	Scophthalmus maximus (related: turbot)	inhibitor of vertebrate lysozyme	gene mutation	reduced virulence
Ai.SC002_GM002426	47.3	2.4e-223	PHI:5275	B7VKI8	copA	212663	Vibrio tasmaniensis	No Data Found	Crassostrea gigas (related: pacific oyster)	Copper homeostasis	gene deletion: full; gene complementation	reduced virulence
Ai.SC002_GM002440	83	0	PHI:6472	P0A6Z3	htpG	562	Escherichia coli	Diarrhea	Rattus rattus (related: black rat)	heat shock protein 90 chaperone	Gene mutation	reduced virulence
Ai.SC002_GM002452	48.7	5.1e-86	PHI:6386	Q2FD95	adeI	470	Acinetobacter baumannii	Pneumonia; Bloodstream infections	Mus musculus (related: house mouse)	Multidrug efflux protein	Gene mutation	unaffected pathogenicity
Ai.SC002_GM002453	80.7	0	PHI:6451	W9B4M6	acrB	573	Klebsiella pneumoniae	pneumonia	Caenorhabditis elegans (related: roundworm)	Acriflavine resistance protein	gene deletion: full	reduced virulence
Ai.SC002_GM002455	83.6	9.4e-29	PHI:3819	P0A3X0	ymoA	632	Yersinia pestis	Pneumonic Plague	Mus musculus (related: house mouse)	represses the transcription and expression of T3SS genes at room temperature	gene deletion	increased virulence (hypervirulence)
Ai.SC002_GM002467	66.7	8.8e-30	PHI:8676	Q8NL12	hupB (XAC1081)	346	Xanthomonas citri	citrus canker	Citrus limon (related: lemon)	Histone-like protein	Gene mutation; gene complementation	reduced virulence
Ai.SC002_GM002468	93.6	0	PHI:8808	A0A0F6AXS9	lon	28901	Salmonella enterica	Salmonellosis	Homo sapiens (related: human)	ATP-dependent protease	Gene mutation	increased virulence (hypervirulence)
Ai.SC002_GM002469	76.7	8.2e-179	PHI:9833	Q8PBY5	clpX	339	Xanthomonas campestris	black rot	Brassica oleracea (no common name found)	ATP-binding subunit of ATP-dependent Clp protease	Gene mutation; Gene complementation	reduced virulence
Ai.SC002_GM002470	85.4	1.2e-98	PHI:3040	P0A1D7	ClpP	28901	Salmonella enterica	Food Poisoning	Mus musculus (related: house mouse)	proteolytic component	gene deletion: full; gene complementation	reduced virulence
Ai.SC002_GM002476	52.4	1.9e-38	PHI:3259	Q4UQD0	XC_3703	339	Xanthomonas campestris	Black Rot Disease	Raphanus sativus (related: radish)	Cyclic di-GMP Effectors	gene deletion: full	reduced virulence
Ai.SC002_GM002493	46.3	1.4e-35	PHI:3464	P67320	nrdR	1314	Streptococcus pyogenes	Toxic Shock Syndrome	Mus musculus (related: house mouse)	regulator	gene mutation; gene complementation	reduced virulence
Ai.SC002_GM002500	47.2	2.8e-44	PHI:3523	B0LFQ7	Bx-Prx	6326	Bursaphelenchus xylophilus	Pine Wilt Disease	Pinus thunbergii (related: japanese black pine)	Reproduction and pathogenicity	altered gene expression / gene regulation: silencing	loss of pathogenicity
Ai.SC002_GM002540	59.4	2e-33	PHI:2651	Q8ZQ52	yedX	28901	Salmonella enterica	Food Poisoning	Gallus gallus (related: chicken)	Cyclic amidohydrolase that hydrolyses 5-hydroxyisourate (5-HIU)	gene disruption	unaffected pathogenicity
Ai.SC002_GM002547	46.8	1.1e-92	PHI:9843	A0A0H3Q0Y8	ackA	666	Vibrio cholerae	infection	Drosophila melanogaster (related: fruit fly)	Acetate kinase	Gene deletion: full	unaffected pathogenicity
Ai.SC002_GM002551	58.4	1.3e-245	PHI:7596	I6PDX4	MakatG1	92637	Metarhizium acridum	no data found	Locusta migratoria (related: migratory locust)	Catalase-peroxidase	Gene deletion: full; gene complementation	unaffected pathogenicity
Ai.SC002_GM002563	51.1	0	PHI:4923	D2TV59	picC	67825	Citrobacter rodentium	No Data Found	Mus musculus (related: house mouse)	Serine Protease Autotransporter	gene deletion: full; gene complementation	increased virulence (hypervirulence)
Ai.SC002_GM002585	50.7	1.6e-15	PHI:9805	A0A6C7HRI3	rdf	28901	Salmonella enterica	gastroenteritis	Mus musculus (related: house mouse)	Recombination Directionality Factor	Gene deletion: full	reduced virulence
Ai.SC002_GM002609	42.4	7.3e-85	PHI:9014	A0A0K0GGF6	PXO_RS02690	347	Xanthomonas oryzae	bacterial leaf blight	Oryza sativa (related: rice)	Response regulator	Gene mutation	unaffected pathogenicity
Ai.SC002_GM002610	41.1	1e-37	PHI:9122	P0AD45	qseG	562	Escherichia coli	Urinary tract infections	Oryctolagus cuniculus (related: rabbit)	Outer membrane lipoprotein, quorum sensing regulator	Gene mutation; gene complementation	reduced virulence
Ai.SC002_GM002612	78.8	0	PHI:8580	E0SB00	purL (Dda3937_03379)	204038	Dickeya dadantii	Soft rot disease	Cichorium intybus (related: chicory)	Phosphoribosylformyl-glycineamide synthetase	gene deletion: full	reduced virulence
Ai.SC002_GM002620	46.1	9.2e-52	PHI:8514	D2TI83	nlpE	67825	Citrobacter rodentium	colitis	Mus musculus (related: house mouse)	Outer-membrane lipoprotein	gene deletion: full	unaffected pathogenicity
Ai.SC002_GM002637	51	2.4e-72	PHI:3785	Q9X6P4	PA3644	287	Pseudomonas aeruginosa	Infections	Tenebrio molitor (related: yellow mealworm)	acyltransferases	altered gene expression / gene regulation: overexpression	reduced virulence
Ai.SC002_GM002642	42	5.7e-85	PHI:3895	B2SR06	PXO_01122	347	Xanthomonas oryzae	Bacterial Leaf Blight	Oryza sativa (related: rice)	PDZ domain-containing proteases	gene disruption; gene complementation	reduced virulence
Ai.SC002_GM002650	83	2.9e-129	PHI:9334	D2TI55	map	67825	Citrobacter rodentium	colitis	Mus musculus (related: house mouse)	Effector protein	gene mutation	effector (plant avirulence determinant)
Ai.SC002_GM002664	42	8.9e-82	PHI:10102	A0A0F6B0W7	STM14_RS07720 (sufS)	28901	Salmonella enterica	Infections	Lactuca sativa (related: garden lettuce)	Cysteine desulfurase	Gene deletion: full	reduced virulence
Ai.SC002_GM002668	78.8	7.9e-190	PHI:9372	A0A380PMR4	amiC	632	Yersinia pestis	Bubonic plague	Mus musculus (related: house mouse)	N-acetylmuramoyl-L-alanine amidase	Gene mutation	unaffected pathogenicity
Ai.SC002_GM002684	54	9.4e-113	PHI:7024	P06996	ompC	562	Escherichia coli	meningitis	Mus musculus (related: house mouse)	Outer membrane porin	Gene deletion: full; gene complementation	reduced virulence
Ai.SC002_GM002689	93.4	1.6e-79	PHI:6508	P0A1G5	DksA	28901	Salmonella enterica	salmonellosis	Mus musculus (related: house mouse)	Response Regulator	Gene mutation; gene complementation	reduced virulence
Ai.SC002_GM002696	48.4	1.3e-28	PHI:3968	Q4UTV7	XC_2466	339	Xanthomonas campestris	Black Rot Disease	Raphanus sativus (related: radish)	Aspartate alpha-decarboxylase	gene mutation	reduced virulence
Ai.SC002_GM002699	41.5	2.1e-53	PHI:6903	P99075	FbaA	1280	Staphylococcus aureus	white muscardine disease	Galleria mellonella (related: Greater wax moth)	Fructose-bisphosphate aldolase	Functional test in host: direct injection	reduced virulence
Ai.SC002_GM002718	60.5	5.3e-166	PHI:6520	Q5ZVD8	LpdA	446	Legionella pneumophila	legionellosis or Legionnaires¡¯ disease	Mus musculus (related: house mouse)	Effector (plant avirulence determinant)	gene deletion: full	effector (plant avirulence determinant)
Ai.SC002_GM002721	89.8	4.9e-126	PHI:3135	Q66EI1	pdhR	633	Yersinia pseudotuberculosis	Gut-Associated Diseases; Diarrhoea; Enteritis; Colitis	Mus musculus (related: house mouse)	Part of the pyruvate - tricarboxylic acid cycle node	gene disruption	reduced virulence
Ai.SC002_GM002725	46.5	7e-32	PHI:6362	A0A0U1YU94	pilA	553	Pantoea ananatis	no data found	Allium cepa (related: onion)	Twitching motility	Gene mutation; gene complementation	reduced virulence
Ai.SC002_GM002726	42.1	1e-22	PHI:6363	A0A0U1YU79	pilT	553	Pantoea ananatis	no data found	Allium cepa (related: onion)	Twitching motility	Gene mutation; gene complementation	reduced virulence
Ai.SC002_GM002733	59.2	9.6e-310	PHI:5240	A0A059ZR97	secA	470	Acinetobacter baumannii	Nosocomial Infections	Galleria mellonella (related: greater wax moth)	Iron utilization	gene mutation; gene complementation	reduced virulence
Ai.SC002_GM002744	51	9e-104	PHI:7631	Q9HVZ9	murD	287	Pseudomonas aeruginosa	Infections	Lactuca sativa (related: garden lettuce)	UDP-N-acetylmuramoylalanine--D-glutamate ligase	gene deletion: full	loss of pathogenicity
Ai.SC002_GM002746	47.2	2e-93	PHI:7632	Q9HVZ7	murF	287	Pseudomonas aeruginosa	Infections	Lactuca sativa (related: garden lettuce)	Peptidyl-prolyl cis-trans isomerase	gene deletion: full	loss of pathogenicity
Ai.SC002_GM002750	43.1	1.9e-63	PHI:4961	P60392	rsmH	1280	Staphylococcus aureus	Skin Infections; Food Poisoning; Respiratory Diseases	Bombyx mori (related: domestic silkworm)	Ribosomal RNA small subunit methyltransferase H	gene deletion: full; gene complementation	reduced virulence
Ai.SC002_GM002752	86.8	4.6e-167	PHI:2672	P0A2P8	fruR	28901	Salmonella enterica	Food Poisoning	Mus musculus (related: house mouse)	Regulators of systemic infection	gene deletion: full; gene complementation	reduced virulence
Ai.SC002_GM002754	41.3	5.5e-122	PHI:358	Q6SSJ3	ILV2	5207	Cryptococcus neoformans	Cryptococcosis	Mus musculus (related: house mouse)	Acetolactate synthase	gene disruption; gene complementation	loss of pathogenicity
Ai.SC002_GM002756	49	2.6e-76	PHI:7770	A0A0H6RQV7	leuO	666	Vibrio cholerae	cholera	Mus musculus (related: house mouse)	Leucine transcriptional activator	Gene mutation	reduced virulence
Ai.SC002_GM002757	75.6	7.5e-230	PHI:8578	E0SG93	leuA (Dda3937_04301)	204038	Dickeya dadantii	Soft rot disease	Cichorium intybus (related: chicory)	2-Isopropylmalate synthase	gene deletion: full	reduced virulence
Ai.SC002_GM002758	80.6	7.1e-171	PHI:8862	B5F7U8	LeuB	28901	Salmonella enterica	Infections	Mus musculus (related: house mouse)	3-isopropylmalate dehydrogenase	Gene mutation	reduced virulence
Ai.SC002_GM002759	77	4.7e-215	PHI:8964	W9BBU8	leuC	573	Klebsiella pneumoniae	pneumonia	Mus musculus (related: house mouse)	3-Isopropylmalate dehydratase large subunit	Gene deletion: full	reduced virulence
Ai.SC002_GM002760	70.6	1.5e-82	PHI:8965	W9BQ45	leuD	573	Klebsiella pneumoniae	pneumonia	Mus musculus (related: house mouse)	3-Isopropylmalate dehydratase small subunit	Gene deletion: full	reduced virulence
Ai.SC002_GM002773	77.4	9.5e-117	PHI:2735	D0KML5	RsmA	55208	Pectobacterium wasabiae	Soft Rot	Nicotiana tabacum (related: common tobacco)	Posttranscriptional regulator	gene disruption	increased virulence (hypervirulence)
Ai.SC002_GM002780	84.2	1.4e-171	PHI:8577	E0SH08	carA (Dda3937_01390)	204038	Dickeya dadantii	Soft rot disease	Cichorium intybus (related: chicory)	Carbamoyl-phosphate synthase small subunit	gene deletion: full	reduced virulence
Ai.SC002_GM002793	79.5	7.7e-139	PHI:3267	P0A9G2	nhaR	562	Escherichia coli	Infections	Mus musculus (related: house mouse)	Transcriptional activator protein	gene mutation: characterised; gene complementation	reduced virulence
Ai.SC002_GM002794	74.3	3.2e-161	PHI:3266	P13738	nhaA	562	Escherichia coli	Infections	Mus musculus (related: house mouse)	Antiporter gene	gene mutation: characterised; gene complementation	reduced virulence
Ai.SC002_GM002795	50.1	5.4e-97	PHI:6986	P95830	DnaJ	1313	Streptococcus pneumoniae	Pneumococcal pneumonia	Mus musculus (related: house mouse)	Heat shock protein. PI3K and JNK signalling pathway	gene deletion: full	reduced virulence
Ai.SC002_GM002797	75.5	1.1e-79	PHI:9230	P0AC98	satP	562	Escherichia coli	avian colisepticemia	Mus musculus (related: house mouse)	Succinate-acetate/proton symporter	gene mutation; gene complementation	unaffected pathogenicity
Ai.SC002_GM002801	55	4.6e-149	PHI:3914	Q0V515	Sdh1	13684	Parastagonospora nodorum	Stagonospora Nodorum Blotch	Triticum aestivum (related: bread wheat)	encodes succinic semialdehyde dehydrogenase	gene disruption; gene complementation	reduced virulence
Ai.SC002_GM002805	42.1	3.5e-76	PHI:9982	A0A0K0GKF0	thrC (PXO_00822)	347	Xanthomonas oryzae	bacterial leaf blight	Oryza sativa (related: rice)	Threonine synthase	Gene deletion: full; gene complementation	reduced virulence
Ai.SC002_GM002809	95	4.4e-129	PHI:6532	P0A9Q1	arcA	562	Escherichia coli	meningitis	Anas platyrhynchos (related: mallard)	Aerobic respiration control protein	Gene mutation; gene complementation	reduced virulence
Ai.SC002_GM002813	69.1	0	PHI:8899	Q8D179	y Q (Yp_0659)	632	Yersinia pestis	plague	Mus musculus (related: house mouse)	Protein acetyltransferase	Gene deletion: full; gene complementation	reduced virulence
Ai.SC002_GM002825	47.7	8.6e-26	PHI:7475	Q48413	ramA (VK055_1983)	573	Klebsiella pneumoniae	pneumonia	Mus musculus (related: house mouse)	Bacterial regulatory helix-turn-helix, AraC family protein	gene deletion: full	unaffected pathogenicity
Ai.SC002_GM002834	41.9	1.4e-49	PHI:4960	A0A0H3JLK2	rsmI	1280	Staphylococcus aureus	Skin Infections; Food Poisoning; Respiratory Diseases	Bombyx mori (related: domestic silkworm)	Ribosomal RNA small subunit methyltransferase I	gene deletion: full; gene complementation	reduced virulence
Ai.SC002_GM002858	64.2	8.6e-146	PHI:8575	E0SHD8	degQ (Dda3937_00697)	204038	Dickeya dadantii	Soft rot disease	Cichorium intybus (related: chicory)	Protease	gene deletion: full	reduced virulence
Ai.SC002_GM002859	43.6	1.5e-56	PHI:8690	D2TI49	degP (ROD_01651)	67825	Citrobacter rodentium	Colitis	Mus musculus (related: house mouse)	Periplasmic serine endoprotease DegP-like	altered gene expression / gene regulation	unaffected pathogenicity
Ai.SC002_GM002860	62.5	1.5e-143	PHI:7630	Q9HVW7	murA	287	Pseudomonas aeruginosa	Infections	Lactuca sativa (related: garden lettuce)	UDP-N-acetylglucosamine 1-carboxyvinyltransferase	gene deletion: full	unaffected pathogenicity
Ai.SC002_GM002868	49.8	2.9e-83	PHI:7067	Q5NGP7	KdsD	263	Francisella tularensis	tularemia	Mus musculus (related: house mouse)	D-arabinose 5-phosphate isomerase	Gene disruption; gene complementation	reduced virulence
Ai.SC002_GM002873	80.8	4.4e-224	PHI:2906__PHI:3673__PHI:3679	NA
Ai.SC002_GM002875	82.4	2.1e-65	PHI:3133	Q665I9	ptsN	633	Yersinia pseudotuberculosis	Gut-Associated Diseases; Diarrhoea; Enteritis; Colitis	Mus musculus (related: house mouse)	Part of the pyruvate - tricarboxylic acid cycle node	gene disruption	reduced virulence
Ai.SC002_GM002876	48.6	2.7e-69	PHI:7824	Q4UX47	HpaP (XC_1307)	339	Xanthomonas campestris	black rot disease	Brassica oleracea (no common name found)	Regulatory protein with ATPase and phosphatase activity	Gene deletion: full; gene complementation	reduced virulence
Ai.SC002_GM002897	82.7	9.2e-33	PHI:4186	Q7CGG8	ypo0656	632	Yersinia pestis	Bubonic Plague	Mus musculus (related: house mouse)	putative DNA binding protein	gene deletion: partial; gene complementation	reduced virulence
Ai.SC002_GM002899	69.4	2.4e-182	PHI:3147	B8F4X8	rfaE	738	Glaesserella parasuis	Glasser¡¯S Disease	Sus scrofa (related: pig)	Part of cluster invloved in lipooligosaccharide synthesis	gene mutation	reduced virulence
Ai.SC002_GM002900	64.2	9.1e-119	PHI:7946	W9BFU2	lpxL1 (BN49_2155)	573	Klebsiella pneumoniae	pneumonia	Galleria mellonella (related: Greater wax moth)	Lipid A late acyltransferase	Gene deletion: full; gene complementation	reduced virulence
Ai.SC002_GM002913	42.4	5.2e-57	PHI:9841	O51804	rpoS	666	Vibrio cholerae	infection	Drosophila melanogaster (related: fruit fly)	RNA polymerase sigma factor	Gene deletion: full	unaffected pathogenicity
Ai.SC002_GM002957	77.2	5e-95	PHI:6882	P66796	QseB	28901	Salmonella enterica	salmonellosis	Homo sapiens (related: human)	Two-component system response regulator	Gene mutation; gene complementation	increased virulence (hypervirulence)
Ai.SC002_GM002958	58.4	6.4e-145	PHI:3709	J7KWB2	qseC	554	Pectobacterium carotovorum	Soft Rot Disease	Brassica rapa (related: field mustard)	Sensor protein QseC bacterial adrenergic receptor	gene mutation; gene complementation	reduced virulence
Ai.SC002_GM002991	43.8	2.6e-104	PHI:6510__PHI:7620	NA
Ai.SC002_GM002992	87.8	1.6e-141	PHI:2459	D4ICB6	nlpI	552	Erwinia amylovora	Fire Blight	Pyrus communis (related: pear)	Tetratricopeptide lipoprotein	gene deletion: full; gene complementation	reduced virulence
Ai.SC002_GM002993	85.3	0	PHI:3878	Q8ZLT3	pnp	28901	Salmonella enterica	Food Poisoning	Sus scrofa (related: pig)	polynucleotide phosphorylase, an exoribonuclease involved in RNA processing and degradation	gene mutation	reduced virulence
Ai.SC002_GM003003	41.5	3.2e-52	PHI:1566	I1RC95	GzOB006	5518	Fusarium graminearum	Fusarium Ear Blight	Triticum (related: wheat)	transcription factor	gene deletion	lethal
Ai.SC002_GM003006	87.3	3.7e-76	PHI:7130	P64281	greA	28901	Salmonella enterica	Salmonellosis	Mus musculus (related: house mouse)	Transcription elongation factor	Gene mutation	loss of pathogenicity
Ai.SC002_GM003008	55.1	9.5e-62	PHI:4497	P36556	PmrA	28901	Salmonella enterica	Salmonellosis	Mus musculus (related: house mouse)	lipopolysaccharide modification regulator	gene mutation	increased virulence (hypervirulence)
Ai.SC002_GM003016	94.6	4.4e-161	PHI:2959	C5BF98	mdh	67780	Edwardsiella ictaluri	Enteric Septicemia	Ictalurus punctatus (related: channel catfish)	Malate dehydrogenase	gene deletion: partial	reduced virulence
Ai.SC002_GM003030	41.7	2.6e-13	PHI:548__PHI:2305	NA
Ai.SC002_GM003043	85.9	1.6e-222	PHI:2625__PHI:9416	NA
Ai.SC002_GM003050	82.5	7.9e-43	PHI:9566	D4GNZ9	hfq (PANA_RS17940)	553	Pantoea ananatis	center rot of onion	Allium cepa (related: onion)	RNA-binding protein	Gene deletion: full; gene complementation	loss of pathogenicity
Ai.SC002_GM003057	69	9e-66	PHI:6274	P57665	Orn	287	Pseudomonas aeruginosa	Opportunistic infections	Mus musculus (related: house mouse)	Oligoribonuclease	Gene mutation	reduced virulence
Ai.SC002_GM003062	96.7	0	PHI:2960	C5BDL7	frdA	67780	Edwardsiella ictaluri	Enteric Septicemia	Ictalurus punctatus (related: channel catfish)	Fumarate reductase	gene deletion: partial	reduced virulence
Ai.SC002_GM003067	93.1	4.8e-93	PHI:6420	P64036	EF-P	28901	Salmonella enterica	salmonellosis	Mus musculus (related: house mouse)	Elongation factor	Altered gene expression / gene regulation: downregulation	increased virulence (hypervirulence)
Ai.SC002_GM003074	62.5	1.3e-186	PHI:3085	P42375	GroEL	837	Porphyromonas gingivalis	Periodontitis	Rattus (related: rat)	folding of newly synthesized proteins, preventing misfolding and aggregation	functional test in host: direct injection	increased virulence (hypervirulence)
Ai.SC002_GM003082	48.8	2.6e-42	PHI:8849	Q8Z3Y9	STY3178 (YfdX)	28901	Salmonella enterica	Salmonellosis	Galleria mellonella (related: Greater wax moth)	Conserved hypothetical protein	Gene deletion: full; gene complementation	unaffected pathogenicity
Ai.SC002_GM003087	41.9	1.6e-43	PHI:6532	P0A9Q1	arcA	562	Escherichia coli	meningitis	Anas platyrhynchos (related: mallard)	Aerobic respiration control protein	Gene mutation; gene complementation	reduced virulence
Ai.SC002_GM003107	65.1	2.5e-116	PHI:9281	Q9I697	gshB	287	Pseudomonas aeruginosa	urinary tract infection	Mus musculus (related: house mouse)	Glutathione synthetase	Gene deletion; gene complementation	reduced virulence
Ai.SC002_GM003123	58	2.4e-40	PHI:9061	Q2YJ35	nikR (bab2_0432)	235	Brucella abortus	Ovine Brucellosis	Mus musculus (related: house mouse)	Nickel-responsive regulator	Gene mutation	unaffected pathogenicity
Ai.SC002_GM003124	84.1	3.6e-214	PHI:9154	P0AAF1	potE	562	Escherichia coli	colibacillosis	Gallus gallus (related: chicken)	no data found	gene mutation; gene complementation	unaffected pathogenicity
Ai.SC002_GM003125	69.6	3.3e-297	PHI:9151	P21169	speC	562	Escherichia coli	colibacillosis	Gallus gallus (related: chicken)	Constitutive ornithine decarboxylase	gene mutation	unaffected pathogenicity
Ai.SC002_GM003128	44	3.8e-69	PHI:7350	Q2FK71	murQ	1280	Staphylococcus aureus	skin infections; food poisoning; respiratory diseases	Danio rerio (related: zebrafish)	N-acetylmuramic acid-6-phosphate etherase	Gene mutation	unaffected pathogenicity
Ai.SC002_GM003135	68.5	1.1e-65	PHI:9808	P0CW86	SodCI	28901	Salmonella enterica	Salmonellosis	Mus musculus (related: house mouse)	Superoxide dismutase [Cu-Zn] 1	Gene deletion: full; gene complementation	reduced virulence
Ai.SC002_GM003145	42	1.7e-12	PHI:7661	A0A0F6BA89	pspG	28901	Salmonella enterica	salmonellosis	Mus musculus (related: house mouse)	Phage-shock protein	Gene mutation; Gene complementation	unaffected pathogenicity
Ai.SC002_GM003167	41.4	7.9e-61	PHI:6319	Q8DPC2	potA	1313	Streptococcus pneumoniae	Pneumococcal pneumonia	Mus musculus (related: house mouse)	ABC transporter ATP-binding protein - spermidine/putrescine transport	Gene mutation	reduced virulence
Ai.SC002_GM003173	84.5	2e-278	PHI:9310	D4I2T0	pgi	552	Erwinia amylovora	Fire blight	Malus domestica (related: apple)	Glucose-6-phosphate isomerase	gene mutation	reduced virulence
Ai.SC002_GM003178	44.4	1.2e-92	PHI:824__PHI:6838	NA
Ai.SC002_GM003184	69.8	1.1e-173	PHI:6553	Q54001	MdsABC	28901	Salmonella enterica	Salmonellosis	Mus musculus (related: house mouse)	Multidrug transporter of Salmonella	Gene mutation	reduced virulence
Ai.SC002_GM003187	78.5	1.2e-314	PHI:9227	P27550	acs	562	Escherichia coli	avian colisepticemia	Mus musculus (related: house mouse)	Acetyl-coenzyme A synthetase	gene mutation; gene complementation	unaffected pathogenicity
Ai.SC002_GM003188	71.3	3.8e-75	PHI:9230	P0AC98	satP	562	Escherichia coli	avian colisepticemia	Mus musculus (related: house mouse)	Succinate-acetate/proton symporter	gene mutation; gene complementation	unaffected pathogenicity
Ai.SC002_GM003190	67	1e-160	PHI:3942	Q4UZD3	XC_0509	339	Xanthomonas campestris	Black Rot Disease	Raphanus sativus (related: radish)	Phosphoribosylamine-glycine ligase	gene mutation	reduced virulence
Ai.SC002_GM003192	98.9	8.2e-44	PHI:3074	D0Z9U0	hupA	636	Edwardsiella tarda	Hemorrhagic Septicemia	Danio rerio (related: zebrafish)	Nucleoid-associated protein, is a basic DNA-binding protein involved in gene regulation	gene mutation: characterised; gene complementation	reduced virulence
Ai.SC002_GM003199	70.4	0	PHI:7860	A3M1G3	RpoB	470	Acinetobacter baumannii	nosocomial infection	Caenorhabditis elegans (related: roundworm)	beta-subunit of the RNA polymerase	Gene mutation; Gene complementation	reduced virulence
Ai.SC002_GM003200	50.4	2.7e-26	PHI:7583	P9WHE3	Rv0652 (rplL)	1773	Mycobacterium tuberculosis	tuberculosis	Homo sapiens (related: human)	50S ribosomal protein	altered gene expression / gene regulation: overexpression	increased virulence (hypervirulence)
Ai.SC002_GM003220	75.3	4.4e-114	PHI:8759	A0A0U1JBY1	tatC	28901	Salmonella enterica	Salmonellosis	Dictyostelium discoideum (related: amoeba)	Sec-independent protein translocase protein	Gene deletion: full; gene complementation	reduced virulence
Ai.SC002_GM003221	57.6	1.1e-44	PHI:8758	A0A0U1FMH1	tatB	28901	Salmonella enterica	Salmonellosis	Dictyostelium discoideum (related: amoeba)	Sec-independent protein translocase protein	Gene deletion: full; gene complementation	reduced virulence
Ai.SC002_GM003222	72.2	1.3e-25	PHI:9370	Q8ZAM2	tatA	632	Yersinia pestis	Bubonic plague	Mus musculus (related: house mouse)	Sec-independent protein translocase protein	gene mutation; gene complementation	reduced virulence
Ai.SC002_GM003228	42.7	9.4e-128	PHI:7577	Q8ZR28	cstA	28901	Salmonella enterica	salmonellosis	Caenorhabditis elegans (related: roundworm)	Peptide-utilizing carbon starvation protein	gene deletion: full	reduced virulence
Ai.SC002_GM003230	71.5	0	PHI:9315	D4HUM7	metE	552	Erwinia amylovora	Fire blight	Nicotiana tabacum (related: common tobacco)	5-Methyltetrahydropteroyltriglutamate-homocysteine methyltransferase	gene mutation	reduced virulence
Ai.SC002_GM003238	44.3	1.1e-15	PHI:6701	A0A0H6FRN3	gntK	666	Vibrio cholerae	cholera	Oryctolagus cuniculus (related: rabbit)	Thermo-resistant gluconate kinase	Gene mutation; gene complementation	reduced virulence
Ai.SC002_GM003240	96.1	2.7e-87	PHI:10179	A0A0D6I594	tnpA	28901	Salmonella enterica	salmonellosis	Homo sapiens (related: human)	Regulatory RNA/ transposase for IS200	Gene deletion: full	increased virulence (hypervirulence)
Ai.SC002_GM003247	91.1	9.4e-161	PHI:2479	E1AP33	corA	554	Pectobacterium carotovorum	Soft Rot	Daucus carota (related: carrot)	Magnesium/nickel/cobalt transporter	gene disruption; gene complementation	reduced virulence
Ai.SC002_GM003255	56.3	8.8e-273	PHI:9840	Q9KVL9	cya	666	Vibrio cholerae	infection	Drosophila melanogaster (related: fruit fly)	Adenylate cyclase	Gene deletion: full	reduced virulence
Ai.SC002_GM003267	66.3	2.5e-110	PHI:7634	Q9HU22	rmlA	287	Pseudomonas aeruginosa	Infections	Lactuca sativa (related: garden lettuce)	Glucose-1-phosphate thymidylyltransferase	gene deletion: full	loss of pathogenicity
Ai.SC002_GM003272	79.3	1e-158	PHI:4074	V6A547	wecA	615	Serratia marcescens	Hemolymph Bleeding	Bombyx mori (related: domestic silkworm)	virulence factor	gene disruption	reduced virulence
Ai.SC002_GM003273	52.9	3.4e-118	PHI:8558	T1YC56	Rho	1280	Staphylococcus aureus	nosocomial infections	Mus musculus (related: house mouse)	Transcriptional regulator	Gene mutation; gene complementation	increased virulence (hypervirulence)
Ai.SC002_GM003274	85.2	4.1e-50	PHI:2644	P0AA28	thioredoxin 1	28901	Salmonella enterica	Food Poisoning	Caenorhabditis elegans (related: roundworm)	Redox activity	chemical complementation	reduced virulence
Ai.SC002_GM003278	41.3	4.7e-10	PHI:9218	B8NRT5	ppci1 (AFLA_050760)	5059	Aspergillus flavus	Ear rot in corn and yellow mold in peanuts	Arachis hypogaea (related: peanut)	Peptidyl-prolyl cis-trans isomerase	Gene deletion: full; gene complementation	increased virulence (hypervirulence)
Ai.SC002_GM003282	82.1	3.9e-247	PHI:9318	D4HUI1	ilvA	552	Erwinia amylovora	Fire blight	Malus domestica (related: apple)	Threonine dehydratase	gene mutation	reduced virulence
Ai.SC002_GM003286	42.7	4.1e-122	PHI:3975	G4MMK2	MoIlv2	318829	Magnaporthe oryzae	Rice Blast	Hordeum vulgare (related: barley)	Acetolactate synthases	gene disruption; gene complementation	loss of pathogenicity
Ai.SC002_GM003288	60.6	1.2e-173	PHI:7572	W9BJ64	yfiB	573	Klebsiella pneumoniae	pneumonia	Caenorhabditis elegans (related: roundworm)	Outer membrane lipoprotein which acts as a sensor of YfiBNR system	Gene deletion: full; Gene complementation	unaffected pathogenicity
Ai.SC002_GM003293	67.2	7.2e-119	PHI:9594	P26469	rfaC	28901	Salmonella enterica	Salmonellosis	Sus scrofa (related: Pig)	heptosyl transferase	Gene mutation	reduced virulence
Ai.SC002_GM003301	52.6	2.6e-116	PHI:7635	Q9HUH7	waaA	287	Pseudomonas aeruginosa	Infections	Lactuca sativa (related: garden lettuce)	3-deoxy-D-manno-octulosonic-acid (KDO) transferase	gene deletion: full	reduced virulence
Ai.SC002_GM003311	86.9	1.7e-103	PHI:7662	P08870	pyrE	28901	Salmonella enterica	salmonellosis	Bos taurus (related: cattle)	Orotate phosphoribosyltransferase	Gene deletion: full; Chemical complementation	unaffected pathogenicity
Ai.SC002_GM003312	94.4	1e-46	PHI:10179	A0A0D6I594	tnpA	28901	Salmonella enterica	salmonellosis	Homo sapiens (related: human)	Regulatory RNA/ transposase for IS200	Gene deletion: full	increased virulence (hypervirulence)
Ai.SC002_GM003317	54.6	1e-76	PHI:8567	E0SLG2	hdfR (Dda3937_04419)	204038	Dickeya dadantii	Soft rot disease	Cichorium intybus (related: chicory)	DNA-binding transcriptional regulator	gene deletion: full	reduced virulence
Ai.SC002_GM003322	48.3	1.2e-88	PHI:2872	Q48473	ompK36	573	Klebsiella pneumoniae	Pneumonia	Mus musculus (related: house mouse)	Outer membrane protein	gene mutation	reduced virulence
Ai.SC002_GM003328	88.3	1.9e-153	PHI:3092	H3RI38	SoxR	66269	Pantoea stewartii	Stewart¡¯s Wilt	Zea mays (related: maize)	activate gene expression in response to oxidative stress	gene mutation	reduced virulence
Ai.SC002_GM003331	47	1.5e-117	PHI:2632	Q2FIB5	argH	1280	Staphylococcus aureus	Community-Associated And Nosocomial Infections	Mus musculus (related: house mouse)	Argininosuccinate lyase	gene disruption	reduced virulence
Ai.SC002_GM003332	83.9	2.4e-199	PHI:9316	D4HUG4	argG	552	Erwinia amylovora	Fire blight	Malus domestica (related: apple)	Argininosuccinate synthase	gene mutation	reduced virulence
Ai.SC002_GM003336	79.6	0	PHI:9322	D4HUG1	ppc	552	Erwinia amylovora	Fire blight	Malus domestica (related: apple)	Phosphoenolpyruvate carboxylase	gene mutation	unaffected pathogenicity
Ai.SC002_GM003338	82.7	6.7e-143	PHI:9325	D4HUG0	metF	552	Erwinia amylovora	Fire blight	Malus domestica (related: apple)	Methylenetetrahydrofolate reductase	gene mutation	unaffected pathogenicity
Ai.SC002_GM003346	92.1	4e-259	PHI:7742	P0A1P6	glnA	28901	Salmonella enterica	Salmonellosis	Homo sapiens (related: human)	Glutamine synthetase	Gene deletion: full; Chemical complementation	reduced virulence
Ai.SC002_GM003348	62.6	5.4e-139	PHI:7250	A0A088U1Z5	ntrC	95486	Burkholderia cenocepacia	cystic fibrosis-like conditions	Galleria mellonella (related: Greater wax moth)	¦Ò54 activator protein	Gene mutation; gene complementation	unaffected pathogenicity
Ai.SC002_GM003358	68	4.6e-82	PHI:8691	D2TUX9	dsbA (ROD_38991)	67825	Citrobacter rodentium	Colitis	Mus musculus (related: house mouse)	Thiol:disulfide interchange protein	Gene deletion: full; gene complementation	loss of pathogenicity
Ai.SC002_GM003359	60.1	3.2e-122	PHI:8692	D2TUY0	rdoA (ROD_39001)	67825	Citrobacter rodentium	Colitis	Mus musculus (related: house mouse)	Putative regulatory protein kinase	Promoter mutation	unaffected pathogenicity
Ai.SC002_GM003369	40	2.7e-88	PHI:9992	P77257	lsrA	562	Escherichia coli	meningitis	Anas platyrhynchos (related: mallard)	Autoinducer-2 ABC transporter ATP binding subunit	Gene deletion: full; gene complementation	reduced virulence
Ai.SC002_GM003380	89.6	3.7e-140	PHI:9436	A0A0F6B941	atpB	28901	Salmonella enterica	gastroenteritis	Mus musculus (related: house mouse)	F0F1 ATP synthase subunit A	gene mutation	reduced virulence
Ai.SC002_GM003388	56.9	5.3e-147	PHI:8042	B2I2B5	lpxA	470	Acinetobacter baumannii	Pneumonia	Mus musculus (related: house mouse)	N-acetylglucosamine-1-phosphate uridyltransferase	Gene mutation; gene complementation	reduced virulence
Ai.SC002_GM003389	81.9	3.8e-286	PHI:9308	D4I4L2	glmS	552	Erwinia amylovora	Fire blight	Malus domestica (related: apple)	Glucosamine-fructose-6-phosphateaminotransferase	gene mutation	reduced virulence
Ai.SC002_GM003395	66.1	1.8e-96	PHI:3412	Q8PM59	pstB	346	Xanthomonas citri	Citrus Canker	Citrus limonia (related: mandarin lime)	phosphate metabolism	gene mutation	loss of pathogenicity
Ai.SC002_GM000008	44.4	3.7e-23	PHI:10098	A0A0F6B5U5	STM14_RS15425 (iagB)	28901	Salmonella enterica	Infections	Lactuca sativa (related: garden lettuce)	SPI-1 type III secretion system invasion protein	Gene deletion: full	unaffected pathogenicity
Ai.SC002_GM000028	51.4	2.3e-88	PHI:3113	F4MD99	stbA	562	Escherichia coli	Neonatal Meningitis	Rattus (related: rat)	Stability protein for the plasmid	gene mutation: characterised; gene complementation	reduced virulence
Ai.SC002_GM000084	45.3	3.1e-82	PHI:7752	P96354	rv3115	1773	Mycobacterium tuberculosis	tuberculosis	Mus musculus (related: house mouse)	Involved in hypoxia-responsive molybdenum cofactor biosynthesis	Gene deletion: full; gene complementation	unaffected pathogenicity
Ai.SC002_GM000101	45.5	1.9e-41	PHI:3165	W0H866	hopA1	36746	Pseudomonas cichorii	Necrotic Leaf Spots In Celery, Eggplant And Sweet Pepper; Wilt And Stem Rot On Muskmelon; Stem Necrosis In Chrysanthemum; Leaf Spot In Soybean	Solanum melongena (related: eggplant)	Effector (plant avirulence determinant)	gene deletion: full; gene complementation	unaffected pathogenicity
Ai.SC002_GM003409	45.3	3.1e-82	PHI:7752	P96354	rv3115	1773	Mycobacterium tuberculosis	tuberculosis	Mus musculus (related: house mouse)	Involved in hypoxia-responsive molybdenum cofactor biosynthesis	Gene deletion: full; gene complementation	unaffected pathogenicity
Ai.SC002_GM003412	44.4	3.7e-23	PHI:10098	A0A0F6B5U5	STM14_RS15425 (iagB)	28901	Salmonella enterica	Infections	Lactuca sativa (related: garden lettuce)	SPI-1 type III secretion system invasion protein	Gene deletion: full	unaffected pathogenicity
Ai.SC002_GM003443	53.2	1.2e-189	PHI:2980	Q54151	pic	623	Shigella flexneri	Shigellosis	Mus musculus (related: house mouse)	Auto -transporter protein	gene mutation	reduced virulence
Ai.SC002_GM003487	41.9	1.3e-291	PHI:9346	A0A411HAI4	tagB	562	Escherichia coli	neonatal meningitis	Mus musculus (related: house mouse)	Serine protease tandem autotransporter	Gene deletion: full	unaffected pathogenicity
Ai.SC002_GM003531	63.2	4.4e-153	PHI:6522	O51590	ptsG	139	Borreliella burgdorferi	Lyme disease	Mus musculus (related: house mouse)	Pts system, iibc components	Gene mutation; gene complementation	loss of pathogenicity
Ai.SC002_GM003535	41.6	2.1e-30	PHI:2737	Q5H2X8	SSBX	347	Xanthomonas oryzae	Leaf Blight	Oryza sativa (related: rice)	Single-stranded DNA-binding protein	gene deletion: full	reduced virulence
Ai.SC002_GM003545	45.5	1.9e-41	PHI:3165	W0H866	hopA1	36746	Pseudomonas cichorii	Necrotic Leaf Spots In Celery, Eggplant And Sweet Pepper; Wilt And Stem Rot On Muskmelon; Stem Necrosis In Chrysanthemum; Leaf Spot In Soybean	Solanum melongena (related: eggplant)	Effector (plant avirulence determinant)	gene deletion: full; gene complementation	unaffected pathogenicity
Ai.SC002_GM003549	51.4	2.3e-88	PHI:3113	F4MD99	stbA	562	Escherichia coli	Neonatal Meningitis	Rattus (related: rat)	Stability protein for the plasmid	gene mutation: characterised; gene complementation	reduced virulence
Ai.SC002_GM003586	40	1.6e-19	PHI:9869	Q4QNL7	vapC-1	727	Haemophilus influenzae	otitis media and invasive disease	Homo sapiens (related: human)	Ribonuclease	Gene mutation; gene complementation	reduced virulence
Ai.SC002_GM003613	44.4	3.7e-23	PHI:10098	A0A0F6B5U5	STM14_RS15425 (iagB)	28901	Salmonella enterica	Infections	Lactuca sativa (related: garden lettuce)	SPI-1 type III secretion system invasion protein	Gene deletion: full	unaffected pathogenicity
Ai.SC002_GM003621	43.2	1.9e-31	PHI:2737	Q5H2X8	SSBX	347	Xanthomonas oryzae	Leaf Blight	Oryza sativa (related: rice)	Single-stranded DNA-binding protein	gene deletion: full	reduced virulence
Ai.SC002_GM003715	42.7	1.4e-31	PHI:2737	Q5H2X8	SSBX	347	Xanthomonas oryzae	Leaf Blight	Oryza sativa (related: rice)	Single-stranded DNA-binding protein	gene deletion: full	reduced virulence
Ai.SC002_GM003722	44.4	3.7e-23	PHI:10098	A0A0F6B5U5	STM14_RS15425 (iagB)	28901	Salmonella enterica	Infections	Lactuca sativa (related: garden lettuce)	SPI-1 type III secretion system invasion protein	Gene deletion: full	unaffected pathogenicity

## Sheet: VFDB
Gene_id	Identity	E_value	VFDB_internal_id	VF_id	VF_name	Related_genes	Characteristics	Structure_features	Functions	Mechanism
Ai.SC002_GM000120	41.3	7.4e-22	VFG045327	VF0167	GspA	ibpA global stress protein GspA		-	-	19-kDa GroEL-like; dispensable for bacterial survival and growth in macrophage infection	-
Ai.SC002_GM000127	40.3	2.1e-06	VFG039386	SS051	Dot/Icm	coxH2 Coxiella Dot/Icm type IVB secretion system translocated effector		14 genes share detecable homology to the tra/trb genes of col1b-P9 plasmid, a member of the IncI class of conjugal plasmids; the second type IV secretion apparatus lvh(Legionella vir homologs) system is poorly characterized. Its 11 genes are located on a genomic-island-like region. It might play a role in the efficiency of host cell infection by L. pneumophila grown at lower temperatures. However…	Majority of the dot/icm genes are predicted to encode membrane-associated proteins;DotA is an integral cytoplasmic membrane protein with 8 membrane-spanning domians; IcmK and IcmB proteins are on bacterial surface; IcmQ, IcmS, IcmR, IcmW located in the bacterial cytoplasm;IcmS, IcmW, IvgA are chaperons; IcmX are periplasmic protein; RalF structure: 1XSZ	Allows survival and growth in macrophages, prevent phagosome acifidication and lysosome fusion, essential for induction of apoptosis in human macrophages	Assemble and activate a type IV secretion system in the bacterial membrane that exports plasmid and virulence factors to inhibit the phago-lysosome fusion and reprogram the Legionella-bearing vacuole; IcmS was shown to bind members of the SidE family (SidE, SdeA, SdeB, SdeC) and to be required for the export of SdeA; IcmW interacted with and was required for the translocation of additional Dot/Ic…
Ai.SC002_GM000153	40.5	5.4e-41	VFG031738	CVF667	RegX3	regX3 Sensory transduction protein RegX3
Ai.SC002_GM000188	42.9	3.6e-22	VFG000531	VF0116	TTSS(SPI-1 encode)	hilC invasion regulatory protein		-	TTSS injectisome is composed of a multi-ring base anchored to the outer membrane through the outer rings 1 and 2 and to the inner membrane through the inner rings 1 and 2; An inner rod, composed of the protein PrgJ, traverses the base and joins the needle substructure, composed of a single protein, PrgI, at the apical side; The base is composed of three proteins, namely InvG, PrgH and PrgK.	Delivers at least 13 effector proteins through the host cell plasma membrane, most of them are involved in actin cytoskeleton rearrangements, leading to membrane ruffling and Salmonlla invasion	-
Ai.SC002_GM000191	45	1.5e-101	VFG043040	AI139	peritrichous flagella	tar/cheM methyl accepting chemotaxis protein II
Ai.SC002_GM000200	40	5.4e-23	VFG016532	CVF591	Capsule	oppF oligopeptide ABC transporter, permease component		GBS can be suclassified into serotypes according to the immunologic type of the polysaccharide capsule. Of the nine serotypes described so far, the type Ia, Ib, II, III and V are reponsible for the majority of invasive human GBS disease; serotype III is particularly important becasue it causes the majority of infection to neonates	The different capsular polysaccharides consists of high-molecular-weight polymers with a repeating unit composed of glucose, galactose, N-acetylglucosamine and sialic acid; sialic acid plays important role in virulence	Inhibits the binding of the activated complement factor C3b to the surface of S. agalactiae, preventing the activation of the alternative complement pathway and inhibits complement-mediated opsonophagocytosis	-
Ai.SC002_GM000201	43.5	2.2e-27	VFG016532	CVF591	Capsule	oppF oligopeptide ABC transporter, permease component		GBS can be suclassified into serotypes according to the immunologic type of the polysaccharide capsule. Of the nine serotypes described so far, the type Ia, Ib, II, III and V are reponsible for the majority of invasive human GBS disease; serotype III is particularly important becasue it causes the majority of infection to neonates	The different capsular polysaccharides consists of high-molecular-weight polymers with a repeating unit composed of glucose, galactose, N-acetylglucosamine and sialic acid; sialic acid plays important role in virulence	Inhibits the binding of the activated complement factor C3b to the surface of S. agalactiae, preventing the activation of the alternative complement pathway and inhibits complement-mediated opsonophagocytosis	-
Ai.SC002_GM000220	51.6	3.2e-134	VFG043092	AI140	peritrichous flagella	tar/cheM methyl-accepting chemotaxis protein II
Ai.SC002_GM000232	42.9	7.4e-46	VFG031776	CVF667	RegX3	regX3 response regulator with CheY-like receiver domain and winged-helix DNA-binding domain
Ai.SC002_GM000240	72.2	0	VFG018402	CVF005	Mg2+ transport	mgtB hypothetical protein
Ai.SC002_GM000265	46.2	2.9e-112	VFG043536	AI311	BAbS19_II05480	BAbS19_II05480 Glycerol-3-phosphate-binding periplasmic protein precursor
Ai.SC002_GM000268	49.2	1.5e-93	VFG030692	CVF651	Trehalose-recycling ABC transporter	sugC sugar ABC transporter
Ai.SC002_GM000287	68.5	9e-68	VFG042734	AI097	type IV pili	vfr cAMP-regulatory protein
Ai.SC002_GM000293	45.5	9.1e-202	VFG047394	CVF836	Ferrous iron-transport system	ferrous iron transport protein B
Ai.SC002_GM000294	41.4	4.1e-08	VFG045722	CVF359	Ferrous iron transport	feoA ferrous iron transporter A
Ai.SC002_GM000298	41.7	2e-43	VFG038219	VF0463	BfmRS	bfmR biofilm-controlling response regulator		-	-	Controls biofilm formation and cellular morphology;participates in cell adhesion, resistance to serum killing and antibiotic susceptibility	Activates the expression of the ushere chaperone assembly system responsible for the production of pili needed for biofilm formation on polystyrene surfaces;inactivation of bfmS may affect the regulatory process and/or translational modification of OmpA leading to loss of OmpA-mediated pathogenesis
Ai.SC002_GM000319	67.1	1.4e-78	VFG046604	CVF833	Capsule	Fphi_1467 ribulose-phosphate 3-epimerase		GBS can be suclassified into serotypes according to the immunologic type of the polysaccharide capsule. Of the nine serotypes described so far, the type Ia, Ib, II, III and V are reponsible for the majority of invasive human GBS disease; serotype III is particularly important becasue it causes the majority of infection to neonates	The different capsular polysaccharides consists of high-molecular-weight polymers with a repeating unit composed of glucose, galactose, N-acetylglucosamine and sialic acid; sialic acid plays important role in virulence	Inhibits the binding of the activated complement factor C3b to the surface of S. agalactiae, preventing the activation of the alternative complement pathway and inhibits complement-mediated opsonophagocytosis	-
Ai.SC002_GM000344	83.8	6.3e-199	VFG046459	CVF827	EF-Tu	Fphi_1039 elongation factor Tu		-	-	Surface-expressed elongation factor-Tu (EF-Tu) mediates attachment by interacting with host cell nucleolin	-
Ai.SC002_GM000397	44	1.7e-67	VFG043319	AI149	polar flagella	fleQ transcriptional regulator FleQ
Ai.SC002_GM000490	44.6	1e-55	VFG047700	CVF845	Pyrimidine biosynthesis	F7308_0020 aspartate carbamoyltransferase		CarB, CarA, and PyrB encode the large and small subunits of carbamoylphosphate synthetase and aspartate carbamoyl transferase, respectively. These enzymes catalyze the first two steps in the pyrimidine nucleotide biosynthetic pathway in many bacteria, including Francisella, and are required for the virulence of several pathogens, including Salmonella and E. coli	-	Mediating bacterial resistance to reactive oxygen species (ROS) that is important for phagosomal escape	-
Ai.SC002_GM000504	45.1	1.4e-74	VFG015903	CVF546	Phytotoxin phaseolotoxin	argK phaseolotoxin-insensitive ornithine carbamoyltransferase
Ai.SC002_GM000575	45.1	2.4e-28	VFG045476	VF0156	Dot/Icm	lpg0021 Dot/Icm type IV secretion system effector		14 genes share detecable homology to the tra/trb genes of col1b-P9 plasmid, a member of the IncI class of conjugal plasmids; the second type IV secretion apparatus lvh(Legionella vir homologs) system is poorly characterized. Its 11 genes are located on a genomic-island-like region. It might play a role in the efficiency of host cell infection by L. pneumophila grown at lower temperatures. However…	Majority of the dot/icm genes are predicted to encode membrane-associated proteins;DotA is an integral cytoplasmic membrane protein with 8 membrane-spanning domians; IcmK and IcmB proteins are on bacterial surface; IcmQ, IcmS, IcmR, IcmW located in the bacterial cytoplasm;IcmS, IcmW, IvgA are chaperons; IcmX are periplasmic protein; RalF structure: 1XSZ	Allows survival and growth in macrophages, prevent phagosome acifidication and lysosome fusion, essential for induction of apoptosis in human macrophages	Assemble and activate a type IV secretion system in the bacterial membrane that exports plasmid and virulence factors to inhibit the phago-lysosome fusion and reprogram the Legionella-bearing vacuole; IcmS was shown to bind members of the SidE family (SidE, SdeA, SdeB, SdeC) and to be required for the export of SdeA; IcmW interacted with and was required for the translocation of additional Dot/Ic…
Ai.SC002_GM000605	69.8	6.8e-80	VFG038907	CVF793	Hemolysin III	B565_0799 Hemolysin III
Ai.SC002_GM000621	46.5	4.6e-74	VFG013439	CVF494	LOS	htrB lipid A biosynthesis lauroyl acyltransferase		Biosynthesis pathway of LOS is producing a branched oligosaccharide attached to a lipid A via two 3-deoxy-D-manno-2-octulosonic acid (KDO) molecules. The rfaC gene product adds the first heptose (Hep I) to KDO. The rfaF gene product adds the second Hep onto Hep I and is required for <alpha>-chain elongation. The lgtF gene product adds the first Glc of the <alpha>-chain. Genes lgtA, lgtB, lgtE are…	-	Involved in immune system evasion, attachment to epithelial tissue, important mediator of the proinflammatory response;LOS sialylation (by the enzyme Lst) prevents complement deposition and phagocytosis by neutrophils;LOS modification by phosphoethanolamine (by the enzyme LptA) provides resistance to antimicrobial peptides and complement	Binds to asialoglycoprotein receptors on the host cell surface
Ai.SC002_GM000629	44	3.5e-75	VFG019760	CVF518	Type IV pili biosynthesis	pilR putative two-component system, response regulator
Ai.SC002_GM000666	86.6	9.9e-158	VFG000477	VF0112	RpoS	rpoS sigma S sigma 38 factor of RNA polymerase, major sigmafactor during stationary phase		-	-	Necessary for sustaining a log-phase acid tolerance response (ATR), induction a stationary-phase acid survival system, production of thin aggregative fimbriae and expression of spv gene during stationary phase	-
Ai.SC002_GM000684	75.1	1.5e-69	VFG018243	CVF628	Autoinducer-2	luxS S-ribosylhomocysteinase
Ai.SC002_GM000698	47.3	6e-79	VFG044185	IA023	vulnibactin	VVA1298 phospho-2-dehydro-3-deoxyheptonate aldolase
Ai.SC002_GM000705	44	1.2e-183	VFG000079	VF0072	ClpC	clpC endopeptidase Clp ATP-binding chain C		27-kDa stress protein belongs to the Hsp100/Clp family; Regulation of Clp protease expression is mediated by CtsR, the product of the first gene in the ClpC operon	-	An ATPase promoting early escape form the phagosome of macrophages;ClpC is also required for adhesion and invasion, possibly by modulating the expression of InlA,InlB and ActA	-
Ai.SC002_GM000707	44.3	6.7e-51	VFG041913	SS003	T3SS	hrpH membrane-bound lytic murein transglycosylase D		Similar to the Yersinia T3SS	-	A needle-like structure, often described as an "injectisome" that can inject effectors directly into the cytoplasm of target cells; five effectors have been described: AexT, AexU, AopP, AopH and AopO;AexT and AexU are bifunctional toxins that contain a GTPase activating domain, allowing the interruption of host cell-signalling pathways and an ADP-ribosylating domain that can disrupt the host cyto…	-
Ai.SC002_GM000723	41.1	1e-118	VFG043573	AI392	MOMP	CT396 molecular chaperone DnaK		-	-	Binds C3 and C3bi of the complement system and mediates the uptake of the bacteria via the CR1 and CR3 receptors of the macrophage	-
Ai.SC002_GM000728	45.1	1.6e-27	VFG031473	CVF660	Nucleoside diphosphate kinase	ndk Probable nucleoside diphosphate kinase NDK
Ai.SC002_GM000743	44.4	3.4e-89	VFG045720	CVF358	Cytochrome c muturation (ccm) locus	ccmF cytochrome C-type biogenesis protein CcmF
Ai.SC002_GM000751	70	1.3e-181	VFG013203	CVF506	Heme biosynthesis	hemL glutamate-1-semialdehyde-2,1-aminomutase
Ai.SC002_GM000758	40.6	1.3e-70	VFG014958	CVF523	Alginate regulation	mucD serine protease MucD
Ai.SC002_GM000759	44.6	5e-47	VFG000344	VF0268	HitABC	hitC ironIII ABC transporter, ATP-binding protein		HitA encodes a periplasmic ferric-binding protein A (FbpA), a high-affinity iron-binding protein belonging to the transferrin superfamily. hitB encodes a cytoplasmic permease. hitC encodes ATP-binding protein	-	HitABC(fbpABC) operon encodes a periplasmic-binding protein-dependent iron transport system necessary for the utilization of iron bound to transferrin or iron chelates	-
Ai.SC002_GM000761	42.9	7e-77	VFG013190	CVF501	Haemophilus iron transport locus	hitA extracellular solute-binding protein family 1
Ai.SC002_GM000762	58.2	2.6e-173	VFG036964	CVF758	FarAB	farB multidrug resistance translocase		The far efflux system is composed of the FarA membrane fusion protein, the FarB cytoplasmic membrane transporter protein, and the MtrE protein as the outer membrane channel to export antibacterial fatty acids from inside the cell;belongs to Major Facilitator Superfamily (MFS) of efflux pumps and uses the proton motive force as an energy source for export of toxic agents	-	Mediates the resistance to antimicrobial long-chain fatty acids	-
Ai.SC002_GM000763	47.2	6.2e-90	VFG036949	CVF758	FarAB	farA fatty acid resistance protein A		The far efflux system is composed of the FarA membrane fusion protein, the FarB cytoplasmic membrane transporter protein, and the MtrE protein as the outer membrane channel to export antibacterial fatty acids from inside the cell;belongs to Major Facilitator Superfamily (MFS) of efflux pumps and uses the proton motive force as an energy source for export of toxic agents	-	Mediates the resistance to antimicrobial long-chain fatty acids	-
Ai.SC002_GM000788	66.5	1.6e-67	VFG000121	VF0091	Alginate	algU alginate biosynthesis protein AlgZ/FimS		Alginate production is frequently referred to as mucoidy because colonies producing alginate have a wet glistening (mucoid) appearance, which is very different from that of colonies not producing alginate; most of the alginate biosynthetic genes are clustered in the algD operon; Alginate production is highly regulated. Regulatory genes are located in two areas far removed from the biosynthetic ge…	Alginate is a linear polymer of high molecular weight composed of the uronic acids <beta>-D-mannuronate and its C-5 epimer, <alpha>-L-guluronate, which are linked by <beta>-1,4 glycosidic bonds; The early steps in the biosynthesis of alginate to form GDP mannuronic acid require the products of algA and algC to convert fructose-6-phosphate to GDP-mannose and then require the product of algD to con…	Allows the bacteria form biofilm; contributes to the persistence of the bacteria in the CF lung: act as an adhesin, preventing the bacteria from being expelled from the lung, and alginate slime layer makes it more difficult for phagocytes to ingest and kill the bacteria	-
Ai.SC002_GM000801	44.4	4.4e-182	VFG045730	CVF365	RelA	relA GTP pyrophosphokinase		-	-	Associated with stationary phase adaptation and long-term survival	Produce ppGpp (guanosine 5'-diphosphate 3'-diphosphate), an 'alarmone' that suppresses synthesis of stable RNA, induces degradative pathways and modulates expression of genes involved in DNA replication
Ai.SC002_GM000804	60.3	5.5e-140	VFG005579	CVF153	Streptococcal enolase	eno phosphopyruvate hydratase
Ai.SC002_GM000817	50.6	7.3e-65	VFG013326	CVF494	LOS	lpxH UDP-2,3 diacylglucosamine hydrolase		Biosynthesis pathway of LOS is producing a branched oligosaccharide attached to a lipid A via two 3-deoxy-D-manno-2-octulosonic acid (KDO) molecules. The rfaC gene product adds the first heptose (Hep I) to KDO. The rfaF gene product adds the second Hep onto Hep I and is required for <alpha>-chain elongation. The lgtF gene product adds the first Glc of the <alpha>-chain. Genes lgtA, lgtB, lgtE are…	-	Involved in immune system evasion, attachment to epithelial tissue, important mediator of the proinflammatory response;LOS sialylation (by the enzyme Lst) prevents complement deposition and phagocytosis by neutrophils;LOS modification by phosphoethanolamine (by the enzyme LptA) provides resistance to antimicrobial peptides and complement	Binds to asialoglycoprotein receptors on the host cell surface
Ai.SC002_GM000824	53.2	1.8e-156	VFG003356	CVF041	Invasin	inv putative invasin		Homolog of Intimin, a major adhesin of EPEC and EHEC, belongs to inverse autotransporter family (Type Ve); Invasin is expressed in pathogenic Y.enterocolitica strains and Y.pseudotuberculosis, but the Y.pestis inv gene is inactivated by an insertion sequence; the inv gene is located in the middle of a gene cluster encoding the flagella proteins; ~100 kDa, anchored by its amino-terminal region;Inv…	The <beta>1 integrin-binding domain is located in the 192 C-terminal amino acids of the 986-aa Inv protein and incorporates a 76-aa disulfide loop;The crystal structure of the surface-exposed carboxy-terminal portion of Y. pseudotuberculosis Inv reveals an 18 nm long tandem array of five globular domains (D1-D5). The terminal D5 and D4 form the adhesion unit for interaction with <alpha><beta>1 in…	Promoting both attachment and invasion into eukaryotic cells, including nonphagocytic cells	Receptor is <beta>1 integrin, intergrins are able to couple extracellular adhesion events to numerous signaling pathways, and the bacterium is taken up by zipper mechanism
Ai.SC002_GM000826	51.7	7.4e-77	VFG043040	AI139	peritrichous flagella	tar/cheM methyl accepting chemotaxis protein II
Ai.SC002_GM000832	40.7	1.8e-31	VFG011228	CVF381	LPS-modifying enzyme	pagP lipid A palmitoyl transferase
Ai.SC002_GM000842	43.9	3.5e-30	VFG000442	VF0108	Rck	rck resistance to complement killing		Rck belongs to a family of five homologous OMP proteins characterized in Salmonella (Rck and PagC), Escherichia coli (Lom), Yersinia enterocolitica (Ail) and Enterobacter cloacae (OmpX)	Rck is predicted to be an eight-stranded __-barrel protein that resides in the outer membrane	Confers serum resistance by binding human complement factor H.; Rck mediates cell invasion through a Zipper-like mechanism, as described for other bacteria such as Listeria and Yersinia. Salmonella seems to be the first bacterium found to be able to induce both Zipper-like mechanism and the Trigger mechanism mediated by its T3SS-1 apparatus.	-
Ai.SC002_GM000845	47.6	1.5e-38	VFG033141	CVF425	P fimbriae	papA major pilin protein PapA		Mannose-resistant (MRHA); Pap pili expression is tightly regulated in response to several environmental and nutritional factors, also controlled by a methylation-dependent phase variation mechanims;The pap operon is a useful example of pilus assembly since it contains many conserved features:; PapD, a conserved chaperone molecule with an Ig-like domain, is necessary to transport several pilus sub…	PapG adhesin receptor binding domain-unbound form: 1J8S; binary complex of the PapG receptor-binding domain bound To Gbo4 receptor	PapG mediates binding to the <alpha>-D-galactopyranosyl-(1-4)-<beta>-D-galactopyranoside (Gal<alpha>(1,4)Gal) moiety present in a globoseries of glycolipids found on host cells lining the upper urinary tract and erythrocytes; three adhesin variants of PapG-G-I, G-II, G-III recognize three different but related Gal<alpha>(1,4)Gal receptors; PapG-mediated interactions with its Gal<alpha>(1,4)Gal-co…	-
Ai.SC002_GM000846	44.4	2.7e-29	VFG042584	AI046	Sfp fimbriae	sfpH w0007
Ai.SC002_GM000847	72.3	1.7e-83	VFG042586	AI046	Sfp fimbriae	sfpD w0009
Ai.SC002_GM000848	49.1	7.4e-38	VFG000887	VF0220	P fimbriae	papK P pilus minor subunit PapK		Mannose-resistant (MRHA); Pap pili expression is tightly regulated in response to several environmental and nutritional factors, also controlled by a methylation-dependent phase variation mechanims;The pap operon is a useful example of pilus assembly since it contains many conserved features:; PapD, a conserved chaperone molecule with an Ig-like domain, is necessary to transport several pilus sub…	PapG adhesin receptor binding domain-unbound form: 1J8S; binary complex of the PapG receptor-binding domain bound To Gbo4 receptor	PapG mediates binding to the <alpha>-D-galactopyranosyl-(1-4)-<beta>-D-galactopyranoside (Gal<alpha>(1,4)Gal) moiety present in a globoseries of glycolipids found on host cells lining the upper urinary tract and erythrocytes; three adhesin variants of PapG-G-I, G-II, G-III recognize three different but related Gal<alpha>(1,4)Gal receptors; PapG-mediated interactions with its Gal<alpha>(1,4)Gal-co…	-
Ai.SC002_GM000849	40	7.7e-08	VFG000436	VF0104	Pef	pefB plasmid-encoded fimbriae regulatory protein PefB		Chaperone-usher assembly pathway	-	Mediate binding of the bacteria to the microvilli of enterocytes	-
Ai.SC002_GM000911	86.8	7.9e-73	VFG000478	VF0113	Fur	fur transcriptional repressor of iron-responsive genes Fur family ferric uptake regulator		-	-	Repress the expression of iron-regulated genes; also required for acid-induced activation of atr genes	-
Ai.SC002_GM000917	40.5	2.6e-40	VFG027229	CVF333	MprA/B	mprA response regulator with CheY-like receiver domain and winged-helix DNA-binding domain
Ai.SC002_GM000950	40.4	5.9e-13	VFG039075	CVF799	OmpA	ompA peptidoglycan-associated lipoprotein precursor		-	-	A bacterial lipoprotein linking the OM to the cell wall so as to maintain the structural integrity and prevent altered surface exposure or release of PAMPs	-
Ai.SC002_GM000952	48.9	4.8e-81	VFG044185	IA023	vulnibactin	VVA1298 phospho-2-dehydro-3-deoxyheptonate aldolase
Ai.SC002_GM000958	57.2	5.9e-113	VFG038151	CVF775	Capsule	ABTW07_0099 UDP-glucose 4-epimerase		GBS can be suclassified into serotypes according to the immunologic type of the polysaccharide capsule. Of the nine serotypes described so far, the type Ia, Ib, II, III and V are reponsible for the majority of invasive human GBS disease; serotype III is particularly important becasue it causes the majority of infection to neonates	The different capsular polysaccharides consists of high-molecular-weight polymers with a repeating unit composed of glucose, galactose, N-acetylglucosamine and sialic acid; sialic acid plays important role in virulence	Inhibits the binding of the activated complement factor C3b to the surface of S. agalactiae, preventing the activation of the alternative complement pathway and inhibits complement-mediated opsonophagocytosis	-
Ai.SC002_GM000968	50.3	5.2e-88	VFG047505	CVF838	Biotin metabolism	bioB biotin synthase
Ai.SC002_GM000977	43.2	5.9e-51	VFG038247	CVF779	PbpG	pbpG D-alanyl-D-alanine carboxypeptidase		-	-	Penicillin-binding proteins (PBPs) are most commonly associated with binding to and inactivating b-lactam antibiotics; PBPs also participate in the final steps of the biosynthesis of the peptidoglycan layer and thus contribute to bacterial cell stability	-
Ai.SC002_GM000995	43.8	1e-103	VFG043040	AI139	peritrichous flagella	tar/cheM methyl accepting chemotaxis protein II
Ai.SC002_GM001028	45	1.1e-48	VFG010866	CVF358	Cytochrome c muturation (ccm) locus	ccmB ABC transporter involved in cytochrome c biogenesis, CcmB subunit
Ai.SC002_GM001029	48.2	2.6e-62	VFG001856	VF0292	CcmC	ccmC cytochrome c-type biogenesis protein CcmC, putative heme lyase for CcmE		-	-	Required for cytochrome c production, promotes iron assimilation and intracellular infection	-
Ai.SC002_GM001031	45.5	3e-30	VFG010881	CVF358	Cytochrome c muturation (ccm) locus	ccmE cytochrome c-type biogenesis protein CcmE
Ai.SC002_GM001032	51.7	1.4e-190	VFG045720	CVF358	Cytochrome c muturation (ccm) locus	ccmF cytochrome C-type biogenesis protein CcmF
Ai.SC002_GM001148	54	7.7e-126	VFG018662	CVF153	Streptococcal enolase	eno enolase
Ai.SC002_GM001157	44.2	9.9e-55	VFG044099	IA049	direct heme uptake system	phuW hypothetical protein
Ai.SC002_GM001183	42	4.5e-41	VFG044378	IA009	thioquinolobactin	qbsC QbsC
Ai.SC002_GM001218	84.4	1.2e-180	VFG003402	CVF043	O-antigen	gmd GDP-D-mannose dehydratase		Y. enterocolitica O antigen expression is temperature regulated.	-	LPS O antigen mutants were severely impaired in their ability to colonize the Peyer's patches and did not colonize spleen and liver. The absence of O antigen in the outer membrane affects the expression of other Yersinia virulence factors.	-
Ai.SC002_GM001219	79.9	1.4e-151	VFG002764	CVF043	O-antigen	wcaG nucleotide di-P-sugar epimerase or dehydratase		Y. enterocolitica O antigen expression is temperature regulated.	-	LPS O antigen mutants were severely impaired in their ability to colonize the Peyer's patches and did not colonize spleen and liver. The absence of O antigen in the outer membrane affects the expression of other Yersinia virulence factors.	-
Ai.SC002_GM001221	66.2	2.8e-168	VFG002363	VF0392	O-antigen	manC mannose-1-phosphate guanylyltransferase		Y. enterocolitica O antigen expression is temperature regulated.	-	LPS O antigen mutants were severely impaired in their ability to colonize the Peyer's patches and did not colonize spleen and liver. The absence of O antigen in the outer membrane affects the expression of other Yersinia virulence factors.	-
Ai.SC002_GM001223	58.5	3.8e-95	VFG013162	CVF494	LOS	galU UTP-glucose-1-phosphate uridylyltransferase		Biosynthesis pathway of LOS is producing a branched oligosaccharide attached to a lipid A via two 3-deoxy-D-manno-2-octulosonic acid (KDO) molecules. The rfaC gene product adds the first heptose (Hep I) to KDO. The rfaF gene product adds the second Hep onto Hep I and is required for <alpha>-chain elongation. The lgtF gene product adds the first Glc of the <alpha>-chain. Genes lgtA, lgtB, lgtE are…	-	Involved in immune system evasion, attachment to epithelial tissue, important mediator of the proinflammatory response;LOS sialylation (by the enzyme Lst) prevents complement deposition and phagocytosis by neutrophils;LOS modification by phosphoethanolamine (by the enzyme LptA) provides resistance to antimicrobial peptides and complement	Binds to asialoglycoprotein receptors on the host cell surface
Ai.SC002_GM001224	67.7	1.3e-133	VFG013287	CVF494	LOS	galE UDP-glucose 4-epimerase		Biosynthesis pathway of LOS is producing a branched oligosaccharide attached to a lipid A via two 3-deoxy-D-manno-2-octulosonic acid (KDO) molecules. The rfaC gene product adds the first heptose (Hep I) to KDO. The rfaF gene product adds the second Hep onto Hep I and is required for <alpha>-chain elongation. The lgtF gene product adds the first Glc of the <alpha>-chain. Genes lgtA, lgtB, lgtE are…	-	Involved in immune system evasion, attachment to epithelial tissue, important mediator of the proinflammatory response;LOS sialylation (by the enzyme Lst) prevents complement deposition and phagocytosis by neutrophils;LOS modification by phosphoethanolamine (by the enzyme LptA) provides resistance to antimicrobial peptides and complement	Binds to asialoglycoprotein receptors on the host cell surface
Ai.SC002_GM001225	64.4	1.8e-150	VFG007656	CVF282	Capsular polysaccharide	wbfV/wcvB Predicted UDP-glucose 6-dehydrogenase
Ai.SC002_GM001226	51.6	3.1e-90	VFG016390	CVF567	Polysaccharide capsule	BCE_5384 NAD dependent epimerase/dehydratase family protein
Ai.SC002_GM001235	71.2	2.2e-142	VFG017341	CVF039	Flagella (cluster I)	flhB flagellar biosynthetic protein FlhB
Ai.SC002_GM001236	84.4	0	VFG002356	VF0394	Flagella	flhA flagellar biosynthesis protein FlhA		-	-	Required for efficient cellular invasion.; YplA, a phospholipase is secreted by this type III flagellum secretion system. YplA is required for survival of Y. enterocolitica in the Peyer's patches and for stimulation of the acute inflammatory response of the host to the infection.	-
Ai.SC002_GM001237	47.4	2e-24	VFG002684	CVF039	Flagella (cluster I)	flhE flagellar protein FlhE precursor
Ai.SC002_GM001238	44.6	1e-26	VFG002354	VF0394	Flagella	flgN flagella synthesis protein FlgN		-	-	Required for efficient cellular invasion.; YplA, a phospholipase is secreted by this type III flagellum secretion system. YplA is required for survival of Y. enterocolitica in the Peyer's patches and for stimulation of the acute inflammatory response of the host to the infection.	-
Ai.SC002_GM001239	63.9	7.9e-26	VFG002682	CVF039	Flagella (cluster I)	flgM negative regulator of flagellin synthesis
Ai.SC002_GM001240	46.9	1.9e-51	VFG023682	CVF039	Flagella (cluster I)	flgA flagellar basal body P-ring biosynthesis protein FlgA
Ai.SC002_GM001241	82.5	6.2e-61	VFG002351	VF0394	Flagella	flgB flagellar basal-body rod protein FlgB		-	-	Required for efficient cellular invasion.; YplA, a phospholipase is secreted by this type III flagellum secretion system. YplA is required for survival of Y. enterocolitica in the Peyer's patches and for stimulation of the acute inflammatory response of the host to the infection.	-
Ai.SC002_GM001242	85.8	2.7e-61	VFG002679	CVF039	Flagella (cluster I)	flgC flagellar basal body rod protein
Ai.SC002_GM001243	63.1	1.1e-78	VFG043024	AI139	peritrichous flagella	flgD flagellar basal body rod modification protein
Ai.SC002_GM001244	61.8	4.9e-146	VFG002348	VF0394	Flagella	flgE flagellar hook protein FlgE		-	-	Required for efficient cellular invasion.; YplA, a phospholipase is secreted by this type III flagellum secretion system. YplA is required for survival of Y. enterocolitica in the Peyer's patches and for stimulation of the acute inflammatory response of the host to the infection.	-
Ai.SC002_GM001245	70.1	4.2e-100	VFG020240	CVF039	Flagella (cluster I)	flgF flagellar basal body rod protein FlgF
Ai.SC002_GM001246	90	3.7e-131	VFG003433	CVF039	Flagella (cluster I)	flgG flagellar basal-body rod protein FlgG distal rod protein
Ai.SC002_GM001247	78.3	5e-100	VFG002345	VF0394	Flagella	flgH flagellar L-ring protein precursor FlgH		-	-	Required for efficient cellular invasion.; YplA, a phospholipase is secreted by this type III flagellum secretion system. YplA is required for survival of Y. enterocolitica in the Peyer's patches and for stimulation of the acute inflammatory response of the host to the infection.	-
Ai.SC002_GM001248	80.4	2.7e-159	VFG043029	AI139	peritrichous flagella	flgI flagellar basal body P-ring protein
Ai.SC002_GM001249	61.6	9.2e-108	VFG002343	VF0394	Flagella	flgJ flagellar rod assembly protein/muramidase FlgJ		-	-	Required for efficient cellular invasion.; YplA, a phospholipase is secreted by this type III flagellum secretion system. YplA is required for survival of Y. enterocolitica in the Peyer's patches and for stimulation of the acute inflammatory response of the host to the infection.	-
Ai.SC002_GM001250	56.3	1.2e-168	VFG002671	CVF039	Flagella (cluster I)	flgK flagellar hook-associated protein
Ai.SC002_GM001251	55.1	1.1e-94	VFG043032	AI139	peritrichous flagella	flgL flagellar hook-associated protein FlgL
Ai.SC002_GM001255	59.2	2.9e-124	VFG043568	AI384	Hek	ompD outer membrane porin precursor
Ai.SC002_GM001273	72.1	9e-141	VFG043544	AI330	OmpA	Z1307 outer membrane protein A		-	-	A bacterial lipoprotein linking the OM to the cell wall so as to maintain the structural integrity and prevent altered surface exposure or release of PAMPs	-
Ai.SC002_GM001289	42.6	2.1e-82	VFG011156	CVF380	LPS	bplF lipopolysaccharide biosynthesis protein		Composed of the O-antigen, core polysaccharides and lipid A; the genes involved in the biosynthesis of the basic O-antigen are located in the rfb/rfc loci; O-antigen modification is associated with temperate bacteriophages. Four different serotype-converting phages have been found: SfII, Sf6, SfV and SfX, which are involved in conversion of a serotype Y stain to serotypes 2a, 3b, 5a and X, respec…	-	Required for resistance to host defence and for the intracellular spread, but not for bacterial invasion	-
Ai.SC002_GM001323	75.7	7e-42	VFG002359	VF0394	Flagella	flhD flagellar transcriptional activator FlhD		-	-	Required for efficient cellular invasion.; YplA, a phospholipase is secreted by this type III flagellum secretion system. YplA is required for survival of Y. enterocolitica in the Peyer's patches and for stimulation of the acute inflammatory response of the host to the infection.	-
Ai.SC002_GM001324	78.8	5.1e-85	VFG002358	VF0394	Flagella	flhC flagellar biosynthesis transcription activator FlhC		-	-	Required for efficient cellular invasion.; YplA, a phospholipase is secreted by this type III flagellum secretion system. YplA is required for survival of Y. enterocolitica in the Peyer's patches and for stimulation of the acute inflammatory response of the host to the infection.	-
Ai.SC002_GM001325	84.7	6.5e-140	VFG043213	AI145	peritrichous flagella	motA flagellar motor protein MotA
Ai.SC002_GM001326	65.8	7.8e-118	VFG043212	AI145	peritrichous flagella	motB flagellar motor protein MotB
Ai.SC002_GM001327	75.2	1.8e-278	VFG043211	AI145	peritrichous flagella	cheA chemotaxis protein CheA
Ai.SC002_GM001328	90.7	3.3e-77	VFG043210	AI145	peritrichous flagella	cheW purine-binding chemotaxis protein CheW
Ai.SC002_GM001329	67.1	4.7e-200	VFG043209	AI145	peritrichous flagella	cheD methyl-accepting chemotaxis protein CheD
Ai.SC002_GM001330	53.6	9.5e-142	VFG043209	AI145	peritrichous flagella	cheD methyl-accepting chemotaxis protein CheD
Ai.SC002_GM001331	77.3	9.5e-120	VFG043208	AI145	peritrichous flagella	cheR chemotaxis methyltransferase CheR
Ai.SC002_GM001332	86.3	1.2e-169	VFG043207	AI145	peritrichous flagella	cheB chemotaxis-specific methylesterase CheB
Ai.SC002_GM001333	91.5	1.5e-61	VFG043206	AI145	peritrichous flagella	cheY chemotaxis regulatory protein CheY
Ai.SC002_GM001334	74.8	1.3e-89	VFG043205	AI145	peritrichous flagella	cheZ chemotaxis regulator CheZ
Ai.SC002_GM001362	48.6	1.3e-98	VFG013196	CVF506	Heme biosynthesis	hemA Glutamyl-tRNA reductase
Ai.SC002_GM001366	80.6	9.6e-133	VFG013466	CVF494	LOS	kdsA 2-dehydro-3-deoxyphosphooctonate aldolase		Biosynthesis pathway of LOS is producing a branched oligosaccharide attached to a lipid A via two 3-deoxy-D-manno-2-octulosonic acid (KDO) molecules. The rfaC gene product adds the first heptose (Hep I) to KDO. The rfaF gene product adds the second Hep onto Hep I and is required for <alpha>-chain elongation. The lgtF gene product adds the first Glc of the <alpha>-chain. Genes lgtA, lgtB, lgtE are…	-	Involved in immune system evasion, attachment to epithelial tissue, important mediator of the proinflammatory response;LOS sialylation (by the enzyme Lst) prevents complement deposition and phagocytosis by neutrophils;LOS modification by phosphoethanolamine (by the enzyme LptA) provides resistance to antimicrobial peptides and complement	Binds to asialoglycoprotein receptors on the host cell surface
Ai.SC002_GM001394	58.8	5.7e-81	VFG039536	CVF803	T4SS effectors	CBU_1566 Coxiella Dot/Icm type IVB secretion system translocated effector
Ai.SC002_GM001402	59.5	2.4e-108	VFG020187	CVF484	MsbB2	msbB2 lipid A biosynthesis KDO2-lauroyl-lipid IVA acyltransferase
Ai.SC002_GM001446	43.2	4.4e-46	VFG018336	CVF019	Sta	staB hypothetical protein
Ai.SC002_GM001450	50.9	2.1e-86	VFG019078	CVF123	Streptococcal plasmin receptor/GAPDH	plr/gapA glyceraldehyde-3-phosphate dehydrogenase
Ai.SC002_GM001467	68.6	3e-107	VFG013348	CVF494	LOS	galU carbon storage regulator		Biosynthesis pathway of LOS is producing a branched oligosaccharide attached to a lipid A via two 3-deoxy-D-manno-2-octulosonic acid (KDO) molecules. The rfaC gene product adds the first heptose (Hep I) to KDO. The rfaF gene product adds the second Hep onto Hep I and is required for <alpha>-chain elongation. The lgtF gene product adds the first Glc of the <alpha>-chain. Genes lgtA, lgtB, lgtE are…	-	Involved in immune system evasion, attachment to epithelial tissue, important mediator of the proinflammatory response;LOS sialylation (by the enzyme Lst) prevents complement deposition and phagocytosis by neutrophils;LOS modification by phosphoethanolamine (by the enzyme LptA) provides resistance to antimicrobial peptides and complement	Binds to asialoglycoprotein receptors on the host cell surface
Ai.SC002_GM001471	49	1.5e-232	VFG031960	CVF228	Listeria adhesion protein	lap putative alcohol-acetaldehyde dehydrogenase
Ai.SC002_GM001477	48.3	2.9e-35	VFG016532	CVF591	Capsule	oppF oligopeptide ABC transporter, permease component		GBS can be suclassified into serotypes according to the immunologic type of the polysaccharide capsule. Of the nine serotypes described so far, the type Ia, Ib, II, III and V are reponsible for the majority of invasive human GBS disease; serotype III is particularly important becasue it causes the majority of infection to neonates	The different capsular polysaccharides consists of high-molecular-weight polymers with a repeating unit composed of glucose, galactose, N-acetylglucosamine and sialic acid; sialic acid plays important role in virulence	Inhibits the binding of the activated complement factor C3b to the surface of S. agalactiae, preventing the activation of the alternative complement pathway and inhibits complement-mediated opsonophagocytosis	-
Ai.SC002_GM001495	43.2	2.4e-37	VFG026357	CVF308	Tryptophan synthesis	trpD anthranilate phosphoribosyltransferase
Ai.SC002_GM001497	40.8	9.2e-65	VFG026700	CVF315	Mycobactin	mbtI anthranilate synthase component I		Mycobacteria produce two classes of siderophores, mycobactins and the exochelins. Pathogenic mycobacteria solely produce mycobactins, whereas saprophytic mycobacteria such as M. smegmatis and Mycobacterium neoarum produce both mycobactins and exochelins; Mycobactins are salicylatecontaining siderophores, and exochelins are peptidic molecules; Mycobactins are found in two forms that differ in the …	-	Cell-association mycobactin participates in iron internalization and/or to serve as a temporary iron-holding molecule to prevent sudden influx of excess iron if the metal suddenly becomes available after a period of iron limitation	-
Ai.SC002_GM001502	41	2.6e-44	VFG041139	SS193	T6SS	bscS periplasmic solute-binding protein		The genes in VAS cluster showed homology to L. pneumophila icmF, the cluster was designated the IcmF-associated homologous protein (IAHP) gene cluster;requires endocytosis by host cell to secrete VgrG	-	Antibacterial and antienkaryotic activities	VgrG1 carries an enzymatically active domain that is capable of cross-linking actin in eukaryotic cells; three effector-immunity pairs are identified so far, TseL-TsiV1, VasX-TsiV2, VgrG3-TsiV3
Ai.SC002_GM001550	42.1	3.5e-50	VFG011805	CVF396	LOS	CFF8240_1412 aspartate racemase		Biosynthesis pathway of LOS is producing a branched oligosaccharide attached to a lipid A via two 3-deoxy-D-manno-2-octulosonic acid (KDO) molecules. The rfaC gene product adds the first heptose (Hep I) to KDO. The rfaF gene product adds the second Hep onto Hep I and is required for <alpha>-chain elongation. The lgtF gene product adds the first Glc of the <alpha>-chain. Genes lgtA, lgtB, lgtE are…	-	Involved in immune system evasion, attachment to epithelial tissue, important mediator of the proinflammatory response;LOS sialylation (by the enzyme Lst) prevents complement deposition and phagocytosis by neutrophils;LOS modification by phosphoethanolamine (by the enzyme LptA) provides resistance to antimicrobial peptides and complement	Binds to asialoglycoprotein receptors on the host cell surface
Ai.SC002_GM001569	50	6e-66	VFG030695	CVF651	Trehalose-recycling ABC transporter	sugC maltodextrin import ATP-binding protein msmX
Ai.SC002_GM001576	55.3	4.5e-120	VFG039278	CVF803	T4SS effectors	CbuG_1738 trans-2-enoyl-CoA reductase
Ai.SC002_GM001585	43.3	6.5e-59	VFG014394	CVF521	Flagella	fleR sigma-54 dependent transcriptional regulator/response regulator FleR		-	-	Required for efficient cellular invasion.; YplA, a phospholipase is secreted by this type III flagellum secretion system. YplA is required for survival of Y. enterocolitica in the Peyer's patches and for stimulation of the acute inflammatory response of the host to the infection.	-
Ai.SC002_GM001645	40.6	2.1e-64	VFG013992	CVF518	Type IV pili biosynthesis	pilR two component, sigma54 specific, transcriptional regulator, Fis family
Ai.SC002_GM001673	62.2	1e-129	VFG043568	AI384	Hek	ompD outer membrane porin precursor
Ai.SC002_GM001690	46.2	1.7e-59	VFG044101	IA049	direct heme uptake system	phuU permease of ABC transporter
Ai.SC002_GM001695	70.2	7e-98	VFG044236	IA059	direct heme uptake system	hmuV hemin importer ATP-binding subunit
Ai.SC002_GM001696	69.8	3.1e-122	VFG044237	IA059	direct heme uptake system	hemU hemin transport system permease protein HmuU
Ai.SC002_GM001697	63.9	8.8e-91	VFG044238	IA059	direct heme uptake system	hemT hemin-binding periplasmic protein
Ai.SC002_GM001698	62.4	5.5e-122	VFG044138	IA058	direct heme uptake system	hmuS hemin transport protein
Ai.SC002_GM001699	58.2	4.4e-229	VFG044139	IA058	direct heme uptake system	hmuR hemin receptor precursor
Ai.SC002_GM001700	63.9	2.2e-06	VFG044241	IA059	direct heme uptake system	hemP hemin uptake protein
Ai.SC002_GM001701	53.4	4.7e-52	VFG034347	CVF460	Hemin uptake	chuY hypothetical protein
Ai.SC002_GM001702	53.1	3.2e-46	VFG000920	VF0227	Chu	chuX putative heme-binding protein ChuX		ChuA encodes for a 69-kDa outer membrane protein responsible for heme uptake. The chuA nucleotide sequence shows high homology to shuA gene of S. dysenteriae type 1. The gene is part of a larger locus, termed the heme transport locus, which appears to be widely distributed among pathogenic E. coli strains	-	Iron uptake: the ability to use heme and/or hemoglobin might be especially advantageous to pathogenic bacteria. These pathogens often secrete cytotoxins, which gain access to the intracellular heme reservoir besides initiating tissue invasion. Cytotoxin production coupled with the capability to utilize heme and/or hemoglobin could serve as an effective iron acquisition strategy during the progres…	-
Ai.SC002_GM001703	57	4.1e-141	VFG034309	CVF460	Hemin uptake	chuW coproporphyrinogen III oxidase
Ai.SC002_GM001704	55.6	4.7e-97	VFG044185	IA023	vulnibactin	VVA1298 phospho-2-dehydro-3-deoxyheptonate aldolase
Ai.SC002_GM001716	48.2	9.9e-29	VFG022673	CVF313	Magnesium transport	mgtC Mg2+ transport P-type ATPase C MgtC
Ai.SC002_GM001732	44	1.9e-49	VFG038219	VF0463	BfmRS	bfmR biofilm-controlling response regulator		-	-	Controls biofilm formation and cellular morphology;participates in cell adhesion, resistance to serum killing and antibiotic susceptibility	Activates the expression of the ushere chaperone assembly system responsible for the production of pili needed for biofilm formation on polystyrene surfaces;inactivation of bfmS may affect the regulatory process and/or translational modification of OmpA leading to loss of OmpA-mediated pathogenesis
Ai.SC002_GM001747	48.9	1.1e-78	VFG043040	AI139	peritrichous flagella	tar/cheM methyl accepting chemotaxis protein II
Ai.SC002_GM001798	68.6	7e-79	VFG001867	VF0169	SodB	sodB superoxide dismutase		-	-	A cytoplasmic iron superoxide dismutase; important for intracellular survival and transmission	-
Ai.SC002_GM001809	62.9	2.3e-157	VFG034671	CVF429	Invasion of brain endothelial cells (Ibes)	ibeB copper/silver efflux system outer membrane protein CusC
Ai.SC002_GM001810	42.7	2.1e-44	VFG022934	CVF333	MprA/B	mprA two component response transcriptional regulatory protein MprA
Ai.SC002_GM001950	41.5	7.8e-57	VFG044249	IA062	direct heme uptake system	hutC ABC-type hemin transporter, permease protein
Ai.SC002_GM001960	50.9	1.8e-29	VFG012936	CVF473	LPS glucosylation	gtrA bactoprenol-linked glucose translocase
Ai.SC002_GM001961	65.1	8.8e-116	VFG012939	CVF473	LPS glucosylation	gtrB bactoprenol glucosyl transferase
Ai.SC002_GM001966	43.5	7.4e-53	VFG030692	CVF651	Trehalose-recycling ABC transporter	sugC sugar ABC transporter
Ai.SC002_GM002019	73.4	4.1e-139	VFG044280	IA034	Proteobactin	PMI0229 ABC transporter permease
Ai.SC002_GM002020	62.3	1.4e-82	VFG044281	IA034	Proteobactin	PMI0230 ABC transporter ATP-binding protein
Ai.SC002_GM002021	56.5	1.3e-70	VFG016158	CVF555	Achromobactin biosynthesis and transport	acsB 4-hydroxy-2-oxovalerate aldolase
Ai.SC002_GM002022	48.5	2.3e-84	VFG044179	IA038	vibrioferrin	pvsA hypothetical protein
Ai.SC002_GM002023	51.5	1.9e-148	VFG016155	CVF555	Achromobactin biosynthesis and transport	acsA IucA/IucC
Ai.SC002_GM002025	48.3	2.1e-134	VFG016163	CVF555	Achromobactin biosynthesis and transport	acsD iron transporter
Ai.SC002_GM002026	57.7	2.9e-124	VFG044183	IA038	vibrioferrin	pvsE putative diaminopimelate decarboxylase protein
Ai.SC002_GM002028	46.5	9.7e-171	VFG044177	IA038	vibrioferrin	pvuA ferric vibrioferrin receptor
Ai.SC002_GM002052	40.4	1.4e-58	VFG034354	CVF460	Hemin uptake	chuU hemin permease
Ai.SC002_GM002065	43	2.7e-100	VFG019760	CVF518	Type IV pili biosynthesis	pilR putative two-component system, response regulator
Ai.SC002_GM002085	59.2	1.2e-57	VFG015080	CVF529	GacS/GacA two-component system	gacA response regulator GacA
Ai.SC002_GM002097	79.7	2.2e-100	VFG000475	VF0111	PhoPQ	phoP response regulator		-	-	Activated by low divalent cations magnesium and calcium levels; control expression of more than 40 genes; required for intracellular survival, cantionic antimicrobial peptides (CAMPs) resistance, stimulation of cytokine secretion	PhoQ contains distinct binding sites for Mg2+ and Ca2+, and is maximally repressed in the presence of both cations. PhoP-PO4 activates expression of pags (for PhoP-activated genes), including cation transporter, outer membrane proteins, nonspecific acid phosphatase, enzymes important for LPS modification, and pmrAB(a second two-component system that are activated in response to mildly acidic envi…
Ai.SC002_GM002098	62.9	6.4e-169	VFG018397	CVF010	PhoPQ	phoQ hypothetical protein		-	-	Activated by low divalent cations magnesium and calcium levels; control expression of more than 40 genes; required for intracellular survival, cantionic antimicrobial peptides (CAMPs) resistance, stimulation of cytokine secretion	PhoQ contains distinct binding sites for Mg2+ and Ca2+, and is maximally repressed in the presence of both cations. PhoP-PO4 activates expression of pags (for PhoP-activated genes), including cation transporter, outer membrane proteins, nonspecific acid phosphatase, enzymes important for LPS modification, and pmrAB(a second two-component system that are activated in response to mildly acidic envi…
Ai.SC002_GM002131	43.6	1.2e-83	VFG009135	CVF300	FAS-II	kasB 3-oxoacyl-acyl carrier protein synthase II
Ai.SC002_GM002132	64.9	7.4e-21	VFG011430	CVF383	LPS	acpXL acyl carrier protein		Composed of the O-antigen, core polysaccharides and lipid A; the genes involved in the biosynthesis of the basic O-antigen are located in the rfb/rfc loci; O-antigen modification is associated with temperate bacteriophages. Four different serotype-converting phages have been found: SfII, Sf6, SfV and SfX, which are involved in conversion of a serotype Y stain to serotypes 2a, 3b, 5a and X, respec…	-	Required for resistance to host defence and for the intracellular spread, but not for bacterial invasion	-
Ai.SC002_GM002133	77.9	8.6e-106	VFG038840	VF0473	Polar flagella	flmH 3-oxoacyl-ACP reductase		Types of bacterial movement: swimming, swarming, gliding, twitching and sliding. Only swimming and swarming are correlated with the presence of flagella. Swimming is an individual endeavour, while swarming is the movement of a group of bactera; constitutively expressed for motility in liquid environments	-	Necessary for motility, adhesion and invasion;glycosylation of the flagellin may play a role in provoking a proinflamatory response	-
Ai.SC002_GM002142	40.1	1.3e-70	VFG007632	CVF282	Capsular polysaccharide	wecA undecaprenyl-phosphate alpha-N-acetylglucosaminephosphotransferase
Ai.SC002_GM002143	58.9	1.1e-125	VFG007624	CVF282	Capsular polysaccharide	wza putative polysaccharide export protein YccZ precursor
Ai.SC002_GM002144	54.8	9.9e-44	VFG007628	CVF282	Capsular polysaccharide	wzb Protein tyrosine phosphatase
Ai.SC002_GM002145	52.2	1.7e-210	VFG007630	CVF282	Capsular polysaccharide	wzc putative tyrosine-protein kinase Wzc
Ai.SC002_GM002149	40.7	1.6e-119	VFG007643	CVF282	Capsular polysaccharide	wbfB WbfB protein
Ai.SC002_GM002157	53.5	8.3e-45	VFG002318	VF0394	Flagella	fliZ alternative sigma factor regulatory protein		-	-	Required for efficient cellular invasion.; YplA, a phospholipase is secreted by this type III flagellum secretion system. YplA is required for survival of Y. enterocolitica in the Peyer's patches and for stimulation of the acute inflammatory response of the host to the infection.	-
Ai.SC002_GM002158	82	2.4e-105	VFG002319	VF0394	Flagella	fliA flagellar biosynthesis sigma factor		-	-	Required for efficient cellular invasion.; YplA, a phospholipase is secreted by this type III flagellum secretion system. YplA is required for survival of Y. enterocolitica in the Peyer's patches and for stimulation of the acute inflammatory response of the host to the infection.	-
Ai.SC002_GM002159	51.5	1.9e-100	VFG011231	CVF382	Flagella	flaA flagellin		-	-	Required for efficient cellular invasion.; YplA, a phospholipase is secreted by this type III flagellum secretion system. YplA is required for survival of Y. enterocolitica in the Peyer's patches and for stimulation of the acute inflammatory response of the host to the infection.	-
Ai.SC002_GM002161	56.8	2.6e-110	VFG011232	CVF382	Flagella	flaA flagellin		-	-	Required for efficient cellular invasion.; YplA, a phospholipase is secreted by this type III flagellum secretion system. YplA is required for survival of Y. enterocolitica in the Peyer's patches and for stimulation of the acute inflammatory response of the host to the infection.	-
Ai.SC002_GM002162	46.5	3.1e-112	VFG043052	AI139	peritrichous flagella	fliD flagellar capping protein
Ai.SC002_GM002163	74.8	1.8e-46	VFG002325	VF0394	Flagella	fliS flagellar protein FliS		-	-	Required for efficient cellular invasion.; YplA, a phospholipase is secreted by this type III flagellum secretion system. YplA is required for survival of Y. enterocolitica in the Peyer's patches and for stimulation of the acute inflammatory response of the host to the infection.	-
Ai.SC002_GM002164	46.4	1e-22	VFG003414	CVF039	Flagella (cluster I)	fliT FliT
Ai.SC002_GM002167	48.4	8.3e-17	VFG014116	CVF520	LPS O-antigen (P. aeruginosa)	PA3142 hypothetical protein
Ai.SC002_GM002175	63.5	1.8e-29	VFG002327	VF0394	Flagella	fliE flagellar hook-basal body complex protein FliE		-	-	Required for efficient cellular invasion.; YplA, a phospholipase is secreted by this type III flagellum secretion system. YplA is required for survival of Y. enterocolitica in the Peyer's patches and for stimulation of the acute inflammatory response of the host to the infection.	-
Ai.SC002_GM002176	66	4.2e-212	VFG003415	CVF039	Flagella (cluster I)	fliF flagellar M-ring protein
Ai.SC002_GM002177	84.8	1.8e-154	VFG002658	CVF039	Flagella (cluster I)	fliG flagellar motor protein
Ai.SC002_GM002178	45.8	1.5e-52	VFG002330	VF0394	Flagella	fliH flagellar assembly protein H		-	-	Required for efficient cellular invasion.; YplA, a phospholipase is secreted by this type III flagellum secretion system. YplA is required for survival of Y. enterocolitica in the Peyer's patches and for stimulation of the acute inflammatory response of the host to the infection.	-
Ai.SC002_GM002179	81.7	1.5e-209	VFG043110	AI140	peritrichous flagella	fliI flagellum-specific ATP synthase
Ai.SC002_GM002180	62.1	6.8e-42	VFG002332	VF0394	Flagella	fliJ flagellar protein FliJ		-	-	Required for efficient cellular invasion.; YplA, a phospholipase is secreted by this type III flagellum secretion system. YplA is required for survival of Y. enterocolitica in the Peyer's patches and for stimulation of the acute inflammatory response of the host to the infection.	-
Ai.SC002_GM002181	42.3	5.9e-46	VFG043061	AI139	peritrichous flagella	fliK flagellar hook-length control protein
Ai.SC002_GM002182	59	4.7e-41	VFG002334	VF0394	Flagella	fliL flagellar basal body protein FliL		-	-	Required for efficient cellular invasion.; YplA, a phospholipase is secreted by this type III flagellum secretion system. YplA is required for survival of Y. enterocolitica in the Peyer's patches and for stimulation of the acute inflammatory response of the host to the infection.	-
Ai.SC002_GM002183	81.3	8.6e-157	VFG002335	VF0394	Flagella	fliM flagellar motor switch protein FliM		-	-	Required for efficient cellular invasion.; YplA, a phospholipase is secreted by this type III flagellum secretion system. YplA is required for survival of Y. enterocolitica in the Peyer's patches and for stimulation of the acute inflammatory response of the host to the infection.	-
Ai.SC002_GM002184	73.6	2.7e-48	VFG003423	CVF039	Flagella (cluster I)	fliN flagellar motor switch protein
Ai.SC002_GM002185	57.3	5.5e-30	VFG017321	CVF039	Flagella (cluster I)	fliO flagellar protein fliO
Ai.SC002_GM002186	84.1	1.2e-112	VFG043066	AI139	peritrichous flagella	fliP flagellar biosynthesis protein FliP
Ai.SC002_GM002187	84.3	6.6e-34	VFG002339	VF0394	Flagella	fliQ flagellar biosynthetic protein FliQ		-	-	Required for efficient cellular invasion.; YplA, a phospholipase is secreted by this type III flagellum secretion system. YplA is required for survival of Y. enterocolitica in the Peyer's patches and for stimulation of the acute inflammatory response of the host to the infection.	-
Ai.SC002_GM002188	70.7	7.9e-102	VFG002340	VF0394	Flagella	fliR flagellar biosynthetic protein FliR		-	-	Required for efficient cellular invasion.; YplA, a phospholipase is secreted by this type III flagellum secretion system. YplA is required for survival of Y. enterocolitica in the Peyer's patches and for stimulation of the acute inflammatory response of the host to the infection.	-
Ai.SC002_GM002201	71	1.4e-95	VFG038845	VF0473	Polar flagella	nueA 3-deoxy-D-manno-octulosonate cytidylyltransferase		Types of bacterial movement: swimming, swarming, gliding, twitching and sliding. Only swimming and swarming are correlated with the presence of flagella. Swimming is an individual endeavour, while swarming is the movement of a group of bactera; constitutively expressed for motility in liquid environments	-	Necessary for motility, adhesion and invasion;glycosylation of the flagellin may play a role in provoking a proinflamatory response	-
Ai.SC002_GM002205	51.1	1.4e-90	VFG013246	CVF494	LOS	lpxK tetraacyldisaccharide 4'-kinase		Biosynthesis pathway of LOS is producing a branched oligosaccharide attached to a lipid A via two 3-deoxy-D-manno-2-octulosonic acid (KDO) molecules. The rfaC gene product adds the first heptose (Hep I) to KDO. The rfaF gene product adds the second Hep onto Hep I and is required for <alpha>-chain elongation. The lgtF gene product adds the first Glc of the <alpha>-chain. Genes lgtA, lgtB, lgtE are…	-	Involved in immune system evasion, attachment to epithelial tissue, important mediator of the proinflammatory response;LOS sialylation (by the enzyme Lst) prevents complement deposition and phagocytosis by neutrophils;LOS modification by phosphoethanolamine (by the enzyme LptA) provides resistance to antimicrobial peptides and complement	Binds to asialoglycoprotein receptors on the host cell surface
Ai.SC002_GM002206	66.8	4.4e-225	VFG013250	CVF494	LOS	msbA fused lipid transporter subunits of ABC superfamily membrane component/ATP-binding component		Biosynthesis pathway of LOS is producing a branched oligosaccharide attached to a lipid A via two 3-deoxy-D-manno-2-octulosonic acid (KDO) molecules. The rfaC gene product adds the first heptose (Hep I) to KDO. The rfaF gene product adds the second Hep onto Hep I and is required for <alpha>-chain elongation. The lgtF gene product adds the first Glc of the <alpha>-chain. Genes lgtA, lgtB, lgtE are…	-	Involved in immune system evasion, attachment to epithelial tissue, important mediator of the proinflammatory response;LOS sialylation (by the enzyme Lst) prevents complement deposition and phagocytosis by neutrophils;LOS modification by phosphoethanolamine (by the enzyme LptA) provides resistance to antimicrobial peptides and complement	Binds to asialoglycoprotein receptors on the host cell surface
Ai.SC002_GM002240	43.7	5.5e-74	VFG000080	VF0073	ClpE	clpE ATP-dependent protease		Belongs to HSP-100/Clp family	-	An ATPase required for prolonged survival at 42 degree; acts synergistically with ClpC in cell division	-
Ai.SC002_GM002244	46.4	7.8e-29	VFG040971	SS215	pul	pulO pullulanase secretion protein PulO
Ai.SC002_GM002273	48	6.7e-52	VFG004270	AI060	Stc	stcB putative periplasmic chaperone protein
Ai.SC002_GM002274	50.8	2e-247	VFG004269	CVF021	Stc	stcC paral putative outer membrane protein
Ai.SC002_GM002319	42.8	9.1e-37	VFG014106	CVF520	LPS O-antigen (P. aeruginosa)	hisH2 glutamine amidotransferase
Ai.SC002_GM002331	43.6	2.1e-100	VFG043209	AI145	peritrichous flagella	cheD methyl-accepting chemotaxis protein CheD
Ai.SC002_GM002344	40.4	5.2e-39	VFG006259	CVF197	ABC transporter	fbpC ABC transporter, ATP-binding protein, iron related
Ai.SC002_GM002367	40	2.3e-27	VFG041575	SS025	T3SS	esrB two-component response regulator EsrB, LuxR family		Similar to the Yersinia T3SS	-	A needle-like structure, often described as an "injectisome" that can inject effectors directly into the cytoplasm of target cells; five effectors have been described: AexT, AexU, AopP, AopH and AopO;AexT and AexU are bifunctional toxins that contain a GTPase activating domain, allowing the interruption of host cell-signalling pathways and an ADP-ribosylating domain that can disrupt the host cyto…	-
Ai.SC002_GM002369	47	1.5e-268	VFG036991	CVF759	MtrCDE	mtrD drug efflux protein		Resistance/nodulation/division (RND)-type efflux pump;regulated by two transcriptional regulators: a repressor MtrR and an activator MtrA	-	A tripartite multidrug efflux pump essential for resistance to <beta>-lactams (penicillin G and nafcillin), macrolides (erythromycin), and host-derived compounds (peptide LL-37 and progesterone and essential for growth of gonococci in the lower genital tract of experimentally infected female mice	-
Ai.SC002_GM002387	43.8	1.1e-69	VFG047574	CVF839	Purine	F7308_0432 phosphoribosylformylglycinamidine cyclo-ligase
Ai.SC002_GM002406	40	4.1e-31	VFG031724	CVF667	RegX3	regX3 two-component system response regulator
Ai.SC002_GM002426	42.2	3.9e-135	VFG031402	CVF658	Copper exporter	ctpV cation-transporting ATPase V
Ai.SC002_GM002433	78.3	7.1e-162	VFG042678	AI082	Putative fimbriae	etfD fimbrial protein
Ai.SC002_GM002434	84	0	VFG042677	AI082	Putative fimbriae	etfC fimbrial usher protein
Ai.SC002_GM002435	81.5	4.7e-106	VFG042676	AI082	Putative fimbriae	etfB fimbrial chaperon protein
Ai.SC002_GM002436	82.5	6.9e-81	VFG042675	AI082	Putative fimbriae	etfA major fimbrial subunit protein
Ai.SC002_GM002438	47.5	9.5e-87	VFG013617	CVF506	Heme biosynthesis	hemH ferrochelatase
Ai.SC002_GM002452	42.4	2.7e-73	VFG036978	CVF759	MtrCDE	mtrC antibiotic resistance efflux pump component		Resistance/nodulation/division (RND)-type efflux pump;regulated by two transcriptional regulators: a repressor MtrR and an activator MtrA	-	A tripartite multidrug efflux pump essential for resistance to <beta>-lactams (penicillin G and nafcillin), macrolides (erythromycin), and host-derived compounds (peptide LL-37 and progesterone and essential for growth of gonococci in the lower genital tract of experimentally infected female mice	-
Ai.SC002_GM002453	50.6	9.8e-292	VFG036998	CVF759	MtrCDE	mtrD drug efflux transport protein MtrD		Resistance/nodulation/division (RND)-type efflux pump;regulated by two transcriptional regulators: a repressor MtrR and an activator MtrA	-	A tripartite multidrug efflux pump essential for resistance to <beta>-lactams (penicillin G and nafcillin), macrolides (erythromycin), and host-derived compounds (peptide LL-37 and progesterone and essential for growth of gonococci in the lower genital tract of experimentally infected female mice	-
Ai.SC002_GM002465	50	1.1e-12	VFG043478	AI227	Fibronectin-binding protein	comE1 hypothetical protein
Ai.SC002_GM002470	67.5	8.1e-73	VFG000077	VF0074	ClpP	clpP ATP-dependent Clp protease proteolytic subunit		21.6 kDa protein belongs to a family of proteases highly conserved in prokaryotes and eukaryotes	-	Serine protease involved in proteolysis and is required for growth under stress conditions	-
Ai.SC002_GM002500	40.8	5.9e-28	VFG009678	CVF322	AhpC	ahpC alkyl hydroperoxide reductase		-	-	Alkyl hydroperoxide reductase involved in protecting mycobacteria from the oxidative and nitrosative responses of macrophages	-
Ai.SC002_GM002527	40.5	2.5e-29	VFG036559	CVF197	ABC transporter	fbpC iron-uptake permease ATP-binding protein
Ai.SC002_GM002538	73.9	0	VFG042344	SS138	EthA-EthB	ETAE_0911 putative hemolysin precursor
Ai.SC002_GM002539	79.5	7.5e-237	VFG042343	SS138	EthA-EthB	ETAE_0910 hemolysin activator HlyB domain protein
Ai.SC002_GM002551	77.9	0	VFG001862	VF0168	KatAB	katB catalase-peroxidase KatB		-	-	A periplasmic catalase, expressed maximally during the postexponential phase; important for intracellular survival and transmission	-
Ai.SC002_GM002563	52.2	0	VFG012448	SS080	Vat	vat vacuolating autotransporter
Ai.SC002_GM002606	79.1	2.1e-83	VFG013421	CVF494	LOS	gmhA/lpcA phosphoheptose isomerase		Biosynthesis pathway of LOS is producing a branched oligosaccharide attached to a lipid A via two 3-deoxy-D-manno-2-octulosonic acid (KDO) molecules. The rfaC gene product adds the first heptose (Hep I) to KDO. The rfaF gene product adds the second Hep onto Hep I and is required for <alpha>-chain elongation. The lgtF gene product adds the first Glc of the <alpha>-chain. Genes lgtA, lgtB, lgtE are…	-	Involved in immune system evasion, attachment to epithelial tissue, important mediator of the proinflammatory response;LOS sialylation (by the enzyme Lst) prevents complement deposition and phagocytosis by neutrophils;LOS modification by phosphoethanolamine (by the enzyme LptA) provides resistance to antimicrobial peptides and complement	Binds to asialoglycoprotein receptors on the host cell surface
Ai.SC002_GM002609	40.6	5.1e-88	VFG019760	CVF518	Type IV pili biosynthesis	pilR putative two-component system, response regulator
Ai.SC002_GM002636	61.7	2.5e-131	VFG013386	CVF494	LOS	lpxB lipid-A-disaccharide synthase		Biosynthesis pathway of LOS is producing a branched oligosaccharide attached to a lipid A via two 3-deoxy-D-manno-2-octulosonic acid (KDO) molecules. The rfaC gene product adds the first heptose (Hep I) to KDO. The rfaF gene product adds the second Hep onto Hep I and is required for <alpha>-chain elongation. The lgtF gene product adds the first Glc of the <alpha>-chain. Genes lgtA, lgtB, lgtE are…	-	Involved in immune system evasion, attachment to epithelial tissue, important mediator of the proinflammatory response;LOS sialylation (by the enzyme Lst) prevents complement deposition and phagocytosis by neutrophils;LOS modification by phosphoethanolamine (by the enzyme LptA) provides resistance to antimicrobial peptides and complement	Binds to asialoglycoprotein receptors on the host cell surface
Ai.SC002_GM002637	70.2	5.2e-109	VFG013167	CVF494	LOS	lpxA acyl-acyl-carrier-protein--UDP-N-acetylglucosamine O-acyltransferase		Biosynthesis pathway of LOS is producing a branched oligosaccharide attached to a lipid A via two 3-deoxy-D-manno-2-octulosonic acid (KDO) molecules. The rfaC gene product adds the first heptose (Hep I) to KDO. The rfaF gene product adds the second Hep onto Hep I and is required for <alpha>-chain elongation. The lgtF gene product adds the first Glc of the <alpha>-chain. Genes lgtA, lgtB, lgtE are…	-	Involved in immune system evasion, attachment to epithelial tissue, important mediator of the proinflammatory response;LOS sialylation (by the enzyme Lst) prevents complement deposition and phagocytosis by neutrophils;LOS modification by phosphoethanolamine (by the enzyme LptA) provides resistance to antimicrobial peptides and complement	Binds to asialoglycoprotein receptors on the host cell surface
Ai.SC002_GM002638	48.5	2.3e-22	VFG011402	CVF383	LPS	fabZ 3R-hydroxymyristoyl ACP dehydratase		Composed of the O-antigen, core polysaccharides and lipid A; the genes involved in the biosynthesis of the basic O-antigen are located in the rfb/rfc loci; O-antigen modification is associated with temperate bacteriophages. Four different serotype-converting phages have been found: SfII, Sf6, SfV and SfX, which are involved in conversion of a serotype Y stain to serotypes 2a, 3b, 5a and X, respec…	-	Required for resistance to host defence and for the intracellular spread, but not for bacterial invasion	-
Ai.SC002_GM002639	68.5	1.4e-130	VFG013165	CVF494	LOS	lpxD UDP-3-O-3-hydroxymyristoyl glucosamine N-acyltransferase		Biosynthesis pathway of LOS is producing a branched oligosaccharide attached to a lipid A via two 3-deoxy-D-manno-2-octulosonic acid (KDO) molecules. The rfaC gene product adds the first heptose (Hep I) to KDO. The rfaF gene product adds the second Hep onto Hep I and is required for <alpha>-chain elongation. The lgtF gene product adds the first Glc of the <alpha>-chain. Genes lgtA, lgtB, lgtE are…	-	Involved in immune system evasion, attachment to epithelial tissue, important mediator of the proinflammatory response;LOS sialylation (by the enzyme Lst) prevents complement deposition and phagocytosis by neutrophils;LOS modification by phosphoethanolamine (by the enzyme LptA) provides resistance to antimicrobial peptides and complement	Binds to asialoglycoprotein receptors on the host cell surface
Ai.SC002_GM002642	47.2	9.9e-108	VFG015011	CVF523	Alginate regulation	mucP putative membrane-associated zinc metalloprotease
Ai.SC002_GM002644	44.9	2.8e-50	VFG045688	CVF618	Capsule	uppS undecaprenyl diphosphate synthase		GBS can be suclassified into serotypes according to the immunologic type of the polysaccharide capsule. Of the nine serotypes described so far, the type Ia, Ib, II, III and V are reponsible for the majority of invasive human GBS disease; serotype III is particularly important becasue it causes the majority of infection to neonates	The different capsular polysaccharides consists of high-molecular-weight polymers with a repeating unit composed of glucose, galactose, N-acetylglucosamine and sialic acid; sialic acid plays important role in virulence	Inhibits the binding of the activated complement factor C3b to the surface of S. agalactiae, preventing the activation of the alternative complement pathway and inhibits complement-mediated opsonophagocytosis	-
Ai.SC002_GM002684	52.5	3.5e-109	VFG043568	AI384	Hek	ompD outer membrane porin precursor
Ai.SC002_GM002695	48.2	1.3e-57	VFG009301	CVF305	Pantothenate synthesis	panC pantoate--beta-alanine ligase
Ai.SC002_GM002696	48.6	4.9e-25	VFG008117	CVF305	Pantothenate synthesis	panD aspartate 1-decarboxylase precursor PanD
Ai.SC002_GM002725	49	4.5e-33	VFG045954	CVF825	Hemorrhagic E.coli pilus (HCP)	ppdD prepilin peptidase dependent protein D precursor
Ai.SC002_GM002726	47.2	1.5e-100	VFG046000	CVF825	Hemorrhagic E.coli pilus (HCP)	hofB hypothetical protein
Ai.SC002_GM002736	73.3	5.1e-132	VFG013170	CVF494	LOS	lpxC UDP-3-0-acyl N-acetylglucosamine deacetylase		Biosynthesis pathway of LOS is producing a branched oligosaccharide attached to a lipid A via two 3-deoxy-D-manno-2-octulosonic acid (KDO) molecules. The rfaC gene product adds the first heptose (Hep I) to KDO. The rfaF gene product adds the second Hep onto Hep I and is required for <alpha>-chain elongation. The lgtF gene product adds the first Glc of the <alpha>-chain. Genes lgtA, lgtB, lgtE are…	-	Involved in immune system evasion, attachment to epithelial tissue, important mediator of the proinflammatory response;LOS sialylation (by the enzyme Lst) prevents complement deposition and phagocytosis by neutrophils;LOS modification by phosphoethanolamine (by the enzyme LptA) provides resistance to antimicrobial peptides and complement	Binds to asialoglycoprotein receptors on the host cell surface
Ai.SC002_GM002760	45.5	6.5e-43	VFG022648	CVF309	Leucine synthesis	leuD isopropylmalate isomerase small subunit
Ai.SC002_GM002779	57.1	0	VFG047713	CVF845	Pyrimidine biosynthesis	FNFX1_0026 hypothetical protein		CarB, CarA, and PyrB encode the large and small subunits of carbamoylphosphate synthetase and aspartate carbamoyl transferase, respectively. These enzymes catalyze the first two steps in the pyrimidine nucleotide biosynthetic pathway in many bacteria, including Francisella, and are required for the virulence of several pathogens, including Salmonella and E. coli	-	Mediating bacterial resistance to reactive oxygen species (ROS) that is important for phagosomal escape	-
Ai.SC002_GM002780	47.7	5.2e-88	VFG047736	CVF845	Pyrimidine biosynthesis	F7308_0022 carbamoyl-phosphate synthase small chain		CarB, CarA, and PyrB encode the large and small subunits of carbamoylphosphate synthetase and aspartate carbamoyl transferase, respectively. These enzymes catalyze the first two steps in the pyrimidine nucleotide biosynthetic pathway in many bacteria, including Francisella, and are required for the virulence of several pathogens, including Salmonella and E. coli	-	Mediating bacterial resistance to reactive oxygen species (ROS) that is important for phagosomal escape	-
Ai.SC002_GM002796	60.9	8.5e-206	VFG043573	AI392	MOMP	CT396 molecular chaperone DnaK		-	-	Binds C3 and C3bi of the complement system and mediates the uptake of the bacteria via the CR1 and CR3 receptors of the macrophage	-
Ai.SC002_GM002816	47.7	9.1e-39	VFG002552	VF0436	Capsule I	wcbN D-glycero-d-manno-heptose 1,7-bisphosphate phosphatase		-	-	A key virulence determinant and that loss of capsule production results in severe attenuation in animal models of disease	Plays a role in reducing B. pseudomallei phagocytosis by host cells by preventing complement factor C3b deposition on the surface of the bacterium
Ai.SC002_GM002819	66.8	2.2e-102	VFG045346	VF0513	IlpA	IlpA immunogenic lipoprotein A		-	-	Dual functions as an adhesin and an immunostimulant	A lipoprotein that stimulates production of proinflammatory cytokines via TLR2 in human monocytes; involved in bacterial adherence to host cells
Ai.SC002_GM002837	43.6	3.1e-35	VFG011801	CVF396	LOS	gmhA phosphoheptose isomerase		Biosynthesis pathway of LOS is producing a branched oligosaccharide attached to a lipid A via two 3-deoxy-D-manno-2-octulosonic acid (KDO) molecules. The rfaC gene product adds the first heptose (Hep I) to KDO. The rfaF gene product adds the second Hep onto Hep I and is required for <alpha>-chain elongation. The lgtF gene product adds the first Glc of the <alpha>-chain. Genes lgtA, lgtB, lgtE are…	-	Involved in immune system evasion, attachment to epithelial tissue, important mediator of the proinflammatory response;LOS sialylation (by the enzyme Lst) prevents complement deposition and phagocytosis by neutrophils;LOS modification by phosphoethanolamine (by the enzyme LptA) provides resistance to antimicrobial peptides and complement	Binds to asialoglycoprotein receptors on the host cell surface
Ai.SC002_GM002858	45.6	3.2e-62	VFG014988	CVF523	Alginate regulation	algW Peptidase S1, chymotrypsinPDZ/DHR/GLGF
Ai.SC002_GM002859	44.2	8.7e-75	VFG015773	CVF523	Alginate regulation	algW 2-alkenal reductase
Ai.SC002_GM002868	45.5	3.9e-69	VFG011729	CVF393	Capsule biosynthesis and transport	kpsF arabinose-5-phosphate isomerase
Ai.SC002_GM002873	53.9	8.4e-145	VFG042736	AI097	type IV pili	rpoN RNA polymerase factor sigma-54
Ai.SC002_GM002899	68	3.8e-182	VFG000331	VF0044	LOS	rfaE ADP-heptose synthase		Biosynthesis pathway of LOS is producing a branched oligosaccharide attached to a lipid A via two 3-deoxy-D-manno-2-octulosonic acid (KDO) molecules. The rfaC gene product adds the first heptose (Hep I) to KDO. The rfaF gene product adds the second Hep onto Hep I and is required for <alpha>-chain elongation. The lgtF gene product adds the first Glc of the <alpha>-chain. Genes lgtA, lgtB, lgtE are…	-	Involved in immune system evasion, attachment to epithelial tissue, important mediator of the proinflammatory response;LOS sialylation (by the enzyme Lst) prevents complement deposition and phagocytosis by neutrophils;LOS modification by phosphoethanolamine (by the enzyme LptA) provides resistance to antimicrobial peptides and complement	Binds to asialoglycoprotein receptors on the host cell surface
Ai.SC002_GM002900	57.3	5.8e-99	VFG013437	CVF494	LOS	htrB lipid A biosynthesis lauroyl acyltransferase		Biosynthesis pathway of LOS is producing a branched oligosaccharide attached to a lipid A via two 3-deoxy-D-manno-2-octulosonic acid (KDO) molecules. The rfaC gene product adds the first heptose (Hep I) to KDO. The rfaF gene product adds the second Hep onto Hep I and is required for <alpha>-chain elongation. The lgtF gene product adds the first Glc of the <alpha>-chain. Genes lgtA, lgtB, lgtE are…	-	Involved in immune system evasion, attachment to epithelial tissue, important mediator of the proinflammatory response;LOS sialylation (by the enzyme Lst) prevents complement deposition and phagocytosis by neutrophils;LOS modification by phosphoethanolamine (by the enzyme LptA) provides resistance to antimicrobial peptides and complement	Binds to asialoglycoprotein receptors on the host cell surface
Ai.SC002_GM002913	53.6	1.2e-82	VFG009718	CVF325	Sigma A	sigA/rpoV sigma factor MysA
Ai.SC002_GM002957	46.1	5.2e-46	VFG041842	SS016	Cpi-1a + Cpi-1 (SPI-1 like)	armR two-component response regulator
Ai.SC002_GM002992	84.9	1.8e-136	VFG043545	AI331	NlpI	ECS88_3547 lipoprotein NlpI
Ai.SC002_GM002999	49.3	4.7e-32	VFG039487	CVF803	T4SS effectors	CbuG_0575 hypothetical protein
Ai.SC002_GM003001	76.2	1.3e-192	VFG013517	CVF495	Exopolysaccharide	mrsA/glmM phosphoglucosamine mutase
Ai.SC002_GM003008	44.2	2e-45	VFG041842	SS016	Cpi-1a + Cpi-1 (SPI-1 like)	armR two-component response regulator
Ai.SC002_GM003026	62.3	7.7e-153	VFG038900	CVF792	Hemolysin, HlyA	hlyA Hemolysin A
Ai.SC002_GM003030	42.3	1.5e-39	VFG001864	VF0153	Mip	mip macrophage infectivity potentiator Mip		-	24-kDa surface protein forms a nonglobular, V-shaped homodimer.has recently been described. Each monomer of the homodimeric protein consists of an N-terminal dimerization module, a long connecting <alpha>-helix and a C-terminal PPIase domain; PDB code :1FD9	Necessary for intracellular survival	Belongs to the enzyme family of FK-506 binding proteins that exhibit the peptidyl-prolyl-cis/trans isomerase (PPIase) activity, catalyzes the isomerization of peptide bonds N-terminal to Pro residues
Ai.SC002_GM003074	76.1	8.1e-226	VFG010484	CVF347	Hsp60	htpB 60 kDa chaperonin Protein Cpn60groEL proteinHeat shock protein B.		-	-	Mediate a complement-independent attachment to mammalian and amoebal host cells	Specific receptors have not been identified
Ai.SC002_GM003106	49.8	8.7e-58	VFG045607	VF0156	Dot/Icm	lpg2936 Dot/Icm type IV secretion system effector		14 genes share detecable homology to the tra/trb genes of col1b-P9 plasmid, a member of the IncI class of conjugal plasmids; the second type IV secretion apparatus lvh(Legionella vir homologs) system is poorly characterized. Its 11 genes are located on a genomic-island-like region. It might play a role in the efficiency of host cell infection by L. pneumophila grown at lower temperatures. However…	Majority of the dot/icm genes are predicted to encode membrane-associated proteins;DotA is an integral cytoplasmic membrane protein with 8 membrane-spanning domians; IcmK and IcmB proteins are on bacterial surface; IcmQ, IcmS, IcmR, IcmW located in the bacterial cytoplasm;IcmS, IcmW, IvgA are chaperons; IcmX are periplasmic protein; RalF structure: 1XSZ	Allows survival and growth in macrophages, prevent phagosome acifidication and lysosome fusion, essential for induction of apoptosis in human macrophages	Assemble and activate a type IV secretion system in the bacterial membrane that exports plasmid and virulence factors to inhibit the phago-lysosome fusion and reprogram the Legionella-bearing vacuole; IcmS was shown to bind members of the SidE family (SidE, SdeA, SdeB, SdeC) and to be required for the export of SdeA; IcmW interacted with and was required for the translocation of additional Dot/Ic…
Ai.SC002_GM003113	59.8	2.6e-60	VFG013266	CVF494	LOS	orfM putative deoxyribonucleotide triphosphate pyrophosphatase		Biosynthesis pathway of LOS is producing a branched oligosaccharide attached to a lipid A via two 3-deoxy-D-manno-2-octulosonic acid (KDO) molecules. The rfaC gene product adds the first heptose (Hep I) to KDO. The rfaF gene product adds the second Hep onto Hep I and is required for <alpha>-chain elongation. The lgtF gene product adds the first Glc of the <alpha>-chain. Genes lgtA, lgtB, lgtE are…	-	Involved in immune system evasion, attachment to epithelial tissue, important mediator of the proinflammatory response;LOS sialylation (by the enzyme Lst) prevents complement deposition and phagocytosis by neutrophils;LOS modification by phosphoethanolamine (by the enzyme LptA) provides resistance to antimicrobial peptides and complement	Binds to asialoglycoprotein receptors on the host cell surface
Ai.SC002_GM003114	66.1	3e-150	VFG013626	CVF506	Heme biosynthesis	hemN coproporphyrinogen III oxidase
Ai.SC002_GM003131	48.5	0	VFG009599	CVF318	Nitrate reductase	narG nitrate reductase, alpha subunit		NarX function as a respiratory fused nitrate reductase (three different domains present in this protein encode the difference subunits of nitrate reductase: the N-terminal domain showing similarity to narG, the central domain showing homology with narJ and the C-terminus showing homology to narI); NarGHJI is a membrane-bound nitrate reductase complex; NarK2, a putative nitrite-extrusion protein	-	Nitrate respiration helps the bacteria to survive in O2-depleted areas of inflammatory or necrotic tissue	-
Ai.SC002_GM003132	56.2	3.9e-161	VFG009610	CVF318	Nitrate reductase	narH nitrate reductase, beta subunit		NarX function as a respiratory fused nitrate reductase (three different domains present in this protein encode the difference subunits of nitrate reductase: the N-terminal domain showing similarity to narG, the central domain showing homology with narJ and the C-terminus showing homology to narI); NarGHJI is a membrane-bound nitrate reductase complex; NarK2, a putative nitrite-extrusion protein	-	Nitrate respiration helps the bacteria to survive in O2-depleted areas of inflammatory or necrotic tissue	-
Ai.SC002_GM003135	68.5	4e-65	VFG000463	VF0109	SodCI	sodCI Gifsy-2 prophage superoxide dismutase precursor Cu-Zn		Encoded on the lysogenic phage Gifsy-2	-	Contribute to survival during systemic phase of infection	-
Ai.SC002_GM003167	47.2	1.6e-84	VFG030678	CVF651	Trehalose-recycling ABC transporter	sugC ABC transporter-like protein
Ai.SC002_GM003173	76	1.4e-252	VFG013531	CVF495	Exopolysaccharide	pgi glucose-6-phosphate isomerase
Ai.SC002_GM003184	70.3	4.2e-167	VFG044140	IA044	HasA-type hemophore-mediated heme uptake system	hasF outer membrane channel protein
Ai.SC002_GM003192	40.4	3.7e-14	VFG043551	AI354	histone-like protein (Hlp)/laminin-binding protein (LBP)	ML1683 histone-like protein
Ai.SC002_GM003195	77.4	5.1e-160	VFG013200	CVF506	Heme biosynthesis	hemE uroporphyrinogen decarboxylase
Ai.SC002_GM003206	84	2.2e-199	VFG046459	CVF827	EF-Tu	Fphi_1039 elongation factor Tu		-	-	Surface-expressed elongation factor-Tu (EF-Tu) mediates attachment by interacting with host cell nucleolin	-
Ai.SC002_GM003210	53.6	3.7e-45	VFG013201	CVF506	Heme biosynthesis	hemG Protoporphyrinogen oxidase
Ai.SC002_GM003218	74.4	2e-145	VFG013197	CVF506	Heme biosynthesis	hemB Porphobilinogen synthase
Ai.SC002_GM003256	60.8	7.5e-102	VFG013198	CVF506	Heme biosynthesis	hemC porphobilinogen deaminase
Ai.SC002_GM003257	43.5	1.1e-47	VFG013199	CVF506	Heme biosynthesis	hemD Uroporphyrinogen III synthase HEM4
Ai.SC002_GM003259	40.6	1.3e-79	VFG013642	CVF506	Heme biosynthesis	hemY porphyrin biosynthesis protein
Ai.SC002_GM003267	71.2	4e-118	VFG037938	CVF775	Capsule	M3Q_286 bifunctional UDP-N-acetylglucosamine pyrophosphorylase/glucosamine-1-phosphate N-acetyltransferase		GBS can be suclassified into serotypes according to the immunologic type of the polysaccharide capsule. Of the nine serotypes described so far, the type Ia, Ib, II, III and V are reponsible for the majority of invasive human GBS disease; serotype III is particularly important becasue it causes the majority of infection to neonates	The different capsular polysaccharides consists of high-molecular-weight polymers with a repeating unit composed of glucose, galactose, N-acetylglucosamine and sialic acid; sialic acid plays important role in virulence	Inhibits the binding of the activated complement factor C3b to the surface of S. agalactiae, preventing the activation of the alternative complement pathway and inhibits complement-mediated opsonophagocytosis	-
Ai.SC002_GM003268	77.2	5.9e-164	VFG007659	CVF282	Capsular polysaccharide	rmlB dTDP-glucose 4,6-dehydratase
Ai.SC002_GM003269	68.8	2.2e-165	VFG014138	CVF520	LPS O-antigen (P. aeruginosa)	orfH UDP-N-acetyl-D-mannosaminuronate dehydrogenase
Ai.SC002_GM003270	69.5	8.1e-145	VFG007639	CVF282	Capsular polysaccharide	wbjD/wecB UDP-N-acetylglucosamine 2-epimerase
Ai.SC002_GM003271	65	2.3e-125	VFG023778	CVF043	O-antigen	YE105_C0173 lipopolysaccharide biosynthesis protein WzzE		Y. enterocolitica O antigen expression is temperature regulated.	-	LPS O antigen mutants were severely impaired in their ability to colonize the Peyer's patches and did not colonize spleen and liver. The absence of O antigen in the outer membrane affects the expression of other Yersinia virulence factors.	-
Ai.SC002_GM003272	59.9	1.2e-113	VFG013509	CVF494	LOS	wecA undecaprenyl-phosphate alpha-N-acetylglucosaminyl 1-phosphate transferase		Biosynthesis pathway of LOS is producing a branched oligosaccharide attached to a lipid A via two 3-deoxy-D-manno-2-octulosonic acid (KDO) molecules. The rfaC gene product adds the first heptose (Hep I) to KDO. The rfaF gene product adds the second Hep onto Hep I and is required for <alpha>-chain elongation. The lgtF gene product adds the first Glc of the <alpha>-chain. Genes lgtA, lgtB, lgtE are…	-	Involved in immune system evasion, attachment to epithelial tissue, important mediator of the proinflammatory response;LOS sialylation (by the enzyme Lst) prevents complement deposition and phagocytosis by neutrophils;LOS modification by phosphoethanolamine (by the enzyme LptA) provides resistance to antimicrobial peptides and complement	Binds to asialoglycoprotein receptors on the host cell surface
Ai.SC002_GM003291	77.6	2.6e-144	VFG000332	VF0044	LOS	rfaD ADP-L-glycero-D-mannoheptose-6-epimerase		Biosynthesis pathway of LOS is producing a branched oligosaccharide attached to a lipid A via two 3-deoxy-D-manno-2-octulosonic acid (KDO) molecules. The rfaC gene product adds the first heptose (Hep I) to KDO. The rfaF gene product adds the second Hep onto Hep I and is required for <alpha>-chain elongation. The lgtF gene product adds the first Glc of the <alpha>-chain. Genes lgtA, lgtB, lgtE are…	-	Involved in immune system evasion, attachment to epithelial tissue, important mediator of the proinflammatory response;LOS sialylation (by the enzyme Lst) prevents complement deposition and phagocytosis by neutrophils;LOS modification by phosphoethanolamine (by the enzyme LptA) provides resistance to antimicrobial peptides and complement	Binds to asialoglycoprotein receptors on the host cell surface
Ai.SC002_GM003292	63.8	4e-120	VFG013400	CVF494	LOS	rfaF ADP-heptose-LPS heptosyltransferase II		Biosynthesis pathway of LOS is producing a branched oligosaccharide attached to a lipid A via two 3-deoxy-D-manno-2-octulosonic acid (KDO) molecules. The rfaC gene product adds the first heptose (Hep I) to KDO. The rfaF gene product adds the second Hep onto Hep I and is required for <alpha>-chain elongation. The lgtF gene product adds the first Glc of the <alpha>-chain. Genes lgtA, lgtB, lgtE are…	-	Involved in immune system evasion, attachment to epithelial tissue, important mediator of the proinflammatory response;LOS sialylation (by the enzyme Lst) prevents complement deposition and phagocytosis by neutrophils;LOS modification by phosphoethanolamine (by the enzyme LptA) provides resistance to antimicrobial peptides and complement	Binds to asialoglycoprotein receptors on the host cell surface
Ai.SC002_GM003293	56.6	1.2e-96	VFG013152	CVF494	LOS	opsX/rfaC lipopolysaccharide heptosyltransferase I		Biosynthesis pathway of LOS is producing a branched oligosaccharide attached to a lipid A via two 3-deoxy-D-manno-2-octulosonic acid (KDO) molecules. The rfaC gene product adds the first heptose (Hep I) to KDO. The rfaF gene product adds the second Hep onto Hep I and is required for <alpha>-chain elongation. The lgtF gene product adds the first Glc of the <alpha>-chain. Genes lgtA, lgtB, lgtE are…	-	Involved in immune system evasion, attachment to epithelial tissue, important mediator of the proinflammatory response;LOS sialylation (by the enzyme Lst) prevents complement deposition and phagocytosis by neutrophils;LOS modification by phosphoethanolamine (by the enzyme LptA) provides resistance to antimicrobial peptides and complement	Binds to asialoglycoprotein receptors on the host cell surface
Ai.SC002_GM003301	52.7	8.2e-120	VFG013312	CVF494	LOS	kdtA 3-deoxy-D-manno-octulosonic-acid transferase		Biosynthesis pathway of LOS is producing a branched oligosaccharide attached to a lipid A via two 3-deoxy-D-manno-2-octulosonic acid (KDO) molecules. The rfaC gene product adds the first heptose (Hep I) to KDO. The rfaF gene product adds the second Hep onto Hep I and is required for <alpha>-chain elongation. The lgtF gene product adds the first Glc of the <alpha>-chain. Genes lgtA, lgtB, lgtE are…	-	Involved in immune system evasion, attachment to epithelial tissue, important mediator of the proinflammatory response;LOS sialylation (by the enzyme Lst) prevents complement deposition and phagocytosis by neutrophils;LOS modification by phosphoethanolamine (by the enzyme LptA) provides resistance to antimicrobial peptides and complement	Binds to asialoglycoprotein receptors on the host cell surface
Ai.SC002_GM003302	47.6	4.7e-62	VFG013317	CVF494	LOS	lgtF shikimate 5-dehydrogenase		Biosynthesis pathway of LOS is producing a branched oligosaccharide attached to a lipid A via two 3-deoxy-D-manno-2-octulosonic acid (KDO) molecules. The rfaC gene product adds the first heptose (Hep I) to KDO. The rfaF gene product adds the second Hep onto Hep I and is required for <alpha>-chain elongation. The lgtF gene product adds the first Glc of the <alpha>-chain. Genes lgtA, lgtB, lgtE are…	-	Involved in immune system evasion, attachment to epithelial tissue, important mediator of the proinflammatory response;LOS sialylation (by the enzyme Lst) prevents complement deposition and phagocytosis by neutrophils;LOS modification by phosphoethanolamine (by the enzyme LptA) provides resistance to antimicrobial peptides and complement	Binds to asialoglycoprotein receptors on the host cell surface
Ai.SC002_GM003303	45.3	6.8e-35	VFG000320	VF0056	LPS	kdtB lipopolysaccharide core biosynthesis protein		Composed of the O-antigen, core polysaccharides and lipid A; the genes involved in the biosynthesis of the basic O-antigen are located in the rfb/rfc loci; O-antigen modification is associated with temperate bacteriophages. Four different serotype-converting phages have been found: SfII, Sf6, SfV and SfX, which are involved in conversion of a serotype Y stain to serotypes 2a, 3b, 5a and X, respec…	-	Required for resistance to host defence and for the intracellular spread, but not for bacterial invasion	-
Ai.SC002_GM003313	81.8	6.4e-20	VFG018947	CVF041	Invasin	inv invasin		Homolog of Intimin, a major adhesin of EPEC and EHEC, belongs to inverse autotransporter family (Type Ve); Invasin is expressed in pathogenic Y.enterocolitica strains and Y.pseudotuberculosis, but the Y.pestis inv gene is inactivated by an insertion sequence; the inv gene is located in the middle of a gene cluster encoding the flagella proteins; ~100 kDa, anchored by its amino-terminal region;Inv…	The <beta>1 integrin-binding domain is located in the 192 C-terminal amino acids of the 986-aa Inv protein and incorporates a 76-aa disulfide loop;The crystal structure of the surface-exposed carboxy-terminal portion of Y. pseudotuberculosis Inv reveals an 18 nm long tandem array of five globular domains (D1-D5). The terminal D5 and D4 form the adhesion unit for interaction with <alpha><beta>1 in…	Promoting both attachment and invasion into eukaryotic cells, including nonphagocytic cells	Receptor is <beta>1 integrin, intergrins are able to couple extracellular adhesion events to numerous signaling pathways, and the bacterium is taken up by zipper mechanism
Ai.SC002_GM003322	45.1	2.2e-81	VFG043568	AI384	Hek	ompD outer membrane porin precursor
Ai.SC002_GM003346	48.9	7.6e-135	VFG009407	CVF311	Glutamine synthesis	glnA1 glutamine synthetase, type I
Ai.SC002_GM003348	41.3	5.7e-90	VFG019760	CVF518	Type IV pili biosynthesis	pilR putative two-component system, response regulator
Ai.SC002_GM003351	67.2	5.8e-180	VFG013205	CVF506	Heme biosynthesis	hemN oxygen-independent coproporphyrinogen III oxidase
Ai.SC002_GM003388	51.4	6.3e-126	VFG047258	CVF834	LPS	FN3523_0439 N-acetylglucosamine-1-phosphate uridyltransferase/glucosamine-1-phosphate N-acetyltransferase		Composed of the O-antigen, core polysaccharides and lipid A; the genes involved in the biosynthesis of the basic O-antigen are located in the rfb/rfc loci; O-antigen modification is associated with temperate bacteriophages. Four different serotype-converting phages have been found: SfII, Sf6, SfV and SfX, which are involved in conversion of a serotype Y stain to serotypes 2a, 3b, 5a and X, respec…	-	Required for resistance to host defence and for the intracellular spread, but not for bacterial invasion	-
Ai.SC002_GM000008	45.8	4.9e-30	VFG042757	AI099	Longus pili (CS20)	lngT LngT
Ai.SC002_GM000049	62.1	2.5e-110	VFG017855	CVF049	Type IV pili	pilW putative transposase		Pil operon maybe acquired by horizontal gene transfer	-	Contributes to the virulence of Y. pseudotuberculosis.	-
Ai.SC002_GM000109	60.7	8.1e-112	VFG017855	CVF049	Type IV pili	pilW putative transposase		Pil operon maybe acquired by horizontal gene transfer	-	Contributes to the virulence of Y. pseudotuberculosis.	-
Ai.SC002_GM000110	47.7	1.4e-144	VFG042382	VF0437	EtpA	etpB two-partner secretion transporter EtpB		-	-	Interacts with highly conserved regions of flagellin exposed at the tips of flagella, exploiting these long (<1015 mm) appendages to tether EtpA adhesins that anchor bacteria on initial engagement of host cells	-
Ai.SC002_GM003412	48.5	3.2e-29	VFG042757	AI099	Longus pili (CS20)	lngT LngT
Ai.SC002_GM003415	40.9	2.1e-56	VFG038074	CVF775	Capsule	ABK1_0097 transposase		GBS can be suclassified into serotypes according to the immunologic type of the polysaccharide capsule. Of the nine serotypes described so far, the type Ia, Ib, II, III and V are reponsible for the majority of invasive human GBS disease; serotype III is particularly important becasue it causes the majority of infection to neonates	The different capsular polysaccharides consists of high-molecular-weight polymers with a repeating unit composed of glucose, galactose, N-acetylglucosamine and sialic acid; sialic acid plays important role in virulence	Inhibits the binding of the activated complement factor C3b to the surface of S. agalactiae, preventing the activation of the alternative complement pathway and inhibits complement-mediated opsonophagocytosis	-
Ai.SC002_GM003434	63.8	2.1e-112	VFG017855	CVF049	Type IV pili	pilW putative transposase		Pil operon maybe acquired by horizontal gene transfer	-	Contributes to the virulence of Y. pseudotuberculosis.	-
Ai.SC002_GM003443	53.3	1.7e-190	VFG000903	VF0232	Pic	pic serine protease precursor		Belongs to the SPATE (serine protease autotransporters of Enterobacteriaceae) subfamily; the pic gene overlaps two other virulence genes, set1A and set1B	-	Autotransporter protease with mucinase and haemagglutinin activity; facilitate bacterial colonization of intestine by degrading the mucin layer overlaying the intestinal epithelium	-
Ai.SC002_GM003444	59.5	1.6e-107	VFG017855	CVF049	Type IV pili	pilW putative transposase		Pil operon maybe acquired by horizontal gene transfer	-	Contributes to the virulence of Y. pseudotuberculosis.	-
Ai.SC002_GM003456	74.4	6e-50	VFG017856	CVF049	Type IV pili	pilW type IV fimbrial biogenesis protein PilW		Pil operon maybe acquired by horizontal gene transfer	-	Contributes to the virulence of Y. pseudotuberculosis.	-
Ai.SC002_GM003464	62.7	7.1e-110	VFG017855	CVF049	Type IV pili	pilW putative transposase		Pil operon maybe acquired by horizontal gene transfer	-	Contributes to the virulence of Y. pseudotuberculosis.	-
Ai.SC002_GM003487	43.6	9.2e-292	VFG042358	SS068	EaaC	eaaC EaaC
Ai.SC002_GM003500	48.1	8e-145	VFG042382	VF0437	EtpA	etpB two-partner secretion transporter EtpB		-	-	Interacts with highly conserved regions of flagellin exposed at the tips of flagella, exploiting these long (<1015 mm) appendages to tether EtpA adhesins that anchor bacteria on initial engagement of host cells	-
Ai.SC002_GM003501	62.2	5.7e-110	VFG017855	CVF049	Type IV pili	pilW putative transposase		Pil operon maybe acquired by horizontal gene transfer	-	Contributes to the virulence of Y. pseudotuberculosis.	-
Ai.SC002_GM003509	40.9	2.1e-56	VFG038074	CVF775	Capsule	ABK1_0097 transposase		GBS can be suclassified into serotypes according to the immunologic type of the polysaccharide capsule. Of the nine serotypes described so far, the type Ia, Ib, II, III and V are reponsible for the majority of invasive human GBS disease; serotype III is particularly important becasue it causes the majority of infection to neonates	The different capsular polysaccharides consists of high-molecular-weight polymers with a repeating unit composed of glucose, galactose, N-acetylglucosamine and sialic acid; sialic acid plays important role in virulence	Inhibits the binding of the activated complement factor C3b to the surface of S. agalactiae, preventing the activation of the alternative complement pathway and inhibits complement-mediated opsonophagocytosis	-
Ai.SC002_GM003517	40.9	2.1e-56	VFG038074	CVF775	Capsule	ABK1_0097 transposase		GBS can be suclassified into serotypes according to the immunologic type of the polysaccharide capsule. Of the nine serotypes described so far, the type Ia, Ib, II, III and V are reponsible for the majority of invasive human GBS disease; serotype III is particularly important becasue it causes the majority of infection to neonates	The different capsular polysaccharides consists of high-molecular-weight polymers with a repeating unit composed of glucose, galactose, N-acetylglucosamine and sialic acid; sialic acid plays important role in virulence	Inhibits the binding of the activated complement factor C3b to the surface of S. agalactiae, preventing the activation of the alternative complement pathway and inhibits complement-mediated opsonophagocytosis	-
Ai.SC002_GM003521	41.9	5.4e-24	VFG042130	SS026	T3SS	mlr6326 putative DNA invertase		Similar to the Yersinia T3SS	-	A needle-like structure, often described as an "injectisome" that can inject effectors directly into the cytoplasm of target cells; five effectors have been described: AexT, AexU, AopP, AopH and AopO;AexT and AexU are bifunctional toxins that contain a GTPase activating domain, allowing the interruption of host cell-signalling pathways and an ADP-ribosylating domain that can disrupt the host cyto…	-
Ai.SC002_GM003577	61.6	5.3e-108	VFG017856	CVF049	Type IV pili	pilW type IV fimbrial biogenesis protein PilW		Pil operon maybe acquired by horizontal gene transfer	-	Contributes to the virulence of Y. pseudotuberculosis.	-
Ai.SC002_GM003613	48.5	3.2e-29	VFG042757	AI099	Longus pili (CS20)	lngT LngT
Ai.SC002_GM003635	46.7	2.3e-144	VFG042382	VF0437	EtpA	etpB two-partner secretion transporter EtpB		-	-	Interacts with highly conserved regions of flagellin exposed at the tips of flagella, exploiting these long (<1015 mm) appendages to tether EtpA adhesins that anchor bacteria on initial engagement of host cells	-
Ai.SC002_GM003636	61.4	2.8e-112	VFG017855	CVF049	Type IV pili	pilW putative transposase		Pil operon maybe acquired by horizontal gene transfer	-	Contributes to the virulence of Y. pseudotuberculosis.	-
Ai.SC002_GM003665	57	3e-161	VFG009612	CVF318	Nitrate reductase	narH nitrate reductase, beta subunit		NarX function as a respiratory fused nitrate reductase (three different domains present in this protein encode the difference subunits of nitrate reductase: the N-terminal domain showing similarity to narG, the central domain showing homology with narJ and the C-terminus showing homology to narI); NarGHJI is a membrane-bound nitrate reductase complex; NarK2, a putative nitrite-extrusion protein	-	Nitrate respiration helps the bacteria to survive in O2-depleted areas of inflammatory or necrotic tissue	-
Ai.SC002_GM003666	48.5	0	VFG009599	CVF318	Nitrate reductase	narG nitrate reductase, alpha subunit		NarX function as a respiratory fused nitrate reductase (three different domains present in this protein encode the difference subunits of nitrate reductase: the N-terminal domain showing similarity to narG, the central domain showing homology with narJ and the C-terminus showing homology to narI); NarGHJI is a membrane-bound nitrate reductase complex; NarK2, a putative nitrite-extrusion protein	-	Nitrate respiration helps the bacteria to survive in O2-depleted areas of inflammatory or necrotic tissue	-
Ai.SC002_GM003671	47.7	1.4e-144	VFG042382	VF0437	EtpA	etpB two-partner secretion transporter EtpB		-	-	Interacts with highly conserved regions of flagellin exposed at the tips of flagella, exploiting these long (<1015 mm) appendages to tether EtpA adhesins that anchor bacteria on initial engagement of host cells	-
Ai.SC002_GM003700	64	4.1e-113	VFG017855	CVF049	Type IV pili	pilW putative transposase		Pil operon maybe acquired by horizontal gene transfer	-	Contributes to the virulence of Y. pseudotuberculosis.	-
Ai.SC002_GM003722	48.5	3.2e-29	VFG042757	AI099	Longus pili (CS20)	lngT LngT

## Sheet: CARD
ORF_ID	CONTIG	START	STOP	Best_Hit_evalue	Best_Hit_ARO	Best_Identities	ARO	ARO_name	bit_score	AR0_category
Ai.SC002_GM002809 locus=Chr1:2986849:2987565:+				1.18805e-40	vanRE	0.36	ARO:3002929, ARO:3004054, ARO:3002922, ARO:3000828, ARO:3000816, ARO:3002924, ARO:3002925, ARO:3002926, ARO:3002928, ARO:3002927, ARO:3003728, ARO:3002919, ARO:3003066	mtrA, baeR, vanRA, smeR, vanRI, vanRC, vanRE, vanRF, vanRG, Pseudomonas aeruginosa CpxR, vanRL, vanRM, vanRN	113.235, 122.865, 119.013, 125.561, 117.857, 138.658, 127.872, 126.331, 120.553, 117.857, 123.635, 131.724, 122.865	antibiotic resistance gene cluster, cassette, or operon, determinant of resistance to glycopeptide antibiotics, efflux pump complex or subunit conferring antibiotic resistance, protein(s) and two-component regulatory system modulating antibiotic efflux, protein(s) conferring antibiotic resistance via molecular bypass
Ai.SC002_GM001479 locus=Chr1:1544228:1545688:-				3.71964e-55	Enterococcus faecium cls conferring resistance to daptomycin	0.28	ARO:3003092, ARO:3003092	Enterococcus faecium cls conferring resistance to daptomycin	190.66, 190.66	antibiotic resistant gene variant or mutant, determinant of resistance to lipopeptide antibiotics
Ai.SC002_GM002817 locus=Chr1:3002384:3003415:+				8.86248e-37	macB	0.34322	ARO:3000535	macB	137.117	efflux pump complex or subunit conferring antibiotic resistance
Ai.SC002_GM002475 locus=Chr1:2597935:2599332:+				3.37896e-37	hp1181	0.283814	ARO:3003964	hp1181	139.043	efflux pump complex or subunit conferring antibiotic resistance
Ai.SC002_GM001758 locus=Chr1:1832511:1833932:-				8.7647e-38	otr(B)	0.291169	ARO:3002892, ARO:3002893, ARO:3003962, ARO:3001313, ARO:3000074	emrB, tcr3, facT, otr(B), farB	141.739, 140.584, 124.02, 122.479, 127.487	determinant of elfamycin resistance, efflux pump complex or subunit conferring antibiotic resistance, protein(s) and two-component regulatory system modulating antibiotic efflux
Ai.SC002_GM000889 locus=Chr1:884882:885607:-				1.59275e-35	macB	0.352423	ARO:3000535	macB	130.568	efflux pump complex or subunit conferring antibiotic resistance
Ai.SC002_GM000328 locus=Chr1:252757:253935:+				4.13068e-56	patA	0.37037	ARO:3000024	patA	190.274	efflux pump complex or subunit conferring antibiotic resistance
Ai.SC002_GM002678 locus=Chr1:2833385:2834179:-				1.24836e-66	dfrE	0.607843	ARO:3002875	dfrE	204.527	antibiotic target replacement protein, determinant of diaminopyrimidine resistance
Ai.SC002_GM002748 locus=Chr1:2908543:2910300:-				1.89564e-135	Neisseria meningititis PBP2 conferring resistance to beta-lactam	0.397436	ARO:3003937, ARO:3003043	Neisseria meningititis PBP2 conferring resistance to beta-lactam, Streptococcus pneumoniae PBP2x conferring resistance to amoxicillin	407.912, 125.176	antibiotic resistant gene variant or mutant, determinant of beta-lactam resistance
Ai.SC002_GM003179 locus=Chr1:3390507:3392402:-				1.05145e-135	Mycobacterium tuberculosis gyrB mutant conferring resistance to fluoroquinolone	0.388972	ARO:3003318, ARO:3003459	Mycobacterium tuberculosis gyrB mutant conferring resistance to fluoroquinolone, Streptomyces rishiriensis parY mutant conferring resistance to aminocoumarin	382.104, 414.461	antibiotic resistant gene variant or mutant, determinant of aminocoumarin resistance, determinant of fluoroquinolone resistance, gene involved in self-resistance to antibiotic
Ai.SC002_GM000329 locus=Chr1:253950:255875:-				3.84909e-75	TaeA	0.33271	ARO:3002817, ARO:3000616, ARO:3003986, ARO:3000118, ARO:3003749, ARO:3002828, ARO:3002832, ARO:3003036, ARO:3003206, ARO:3003109, ARO:3000300, ARO:3002830, ARO:3003112, ARO:3003111, ARO:3002829, ARO:3002819, ARO:3002833, ARO:3002827	tlrC, srmB, lsaC, msrC, mel, vgaD, msrE, vgaB, lsaE, lsaA, vgaA, vgaALC, TaeA, oleB, salA, carA, lsaB, vgaE	202.216, 184.496, 252.677, 183.341, 227.639, 192.2, 168.703, 199.519, 153.295, 150.214, 151.369, 167.548, 138.272, 142.895, 168.703, 147.517, 175.637, 187.578	efflux pump complex or subunit conferring antibiotic resistance
Ai.SC002_GM001706 locus=Chr1:1766066:1768441:+				1.23141e-49	rphB	0.37386	ARO:3003992, ARO:3000444	rphB, rphA	184.496, 179.874	antibiotic inactivation enzyme, determinant of rifamycin resistance
Ai.SC002_GM002756 locus=Chr1:2918795:2919760:-				2.56556e-109	leuO	0.530822	ARO:3003843	leuO	321.627	determinant of sulfonamide resistance, efflux pump complex or subunit conferring antibiotic resistance, protein(s) and two-component regulatory system modulating antibiotic efflux
Ai.SC002_GM000751 locus=Chr1:726974:728257:-				1.90719e-35	patA	0.287469	ARO:3000024	patA	133.265	efflux pump complex or subunit conferring antibiotic resistance
Ai.SC002_GM002011 locus=Chr1:2102137:2103612:-				2.45204e-60	qacA	0.346437	ARO:3003554, ARO:3004103, ARO:3000573, ARO:3003047, ARO:3000448, ARO:3003046, ARO:3003967	lrfA, QepA2, qepA, tcmA, tet(43), qacB, qacA	152.525, 183.341, 151.754, 199.904, 179.489, 205.682, 194.512	efflux pump complex or subunit conferring antibiotic resistance
Ai.SC002_GM002708 locus=Chr1:2863183:2864109:-				1.20088e-43	oleC	0.363208	ARO:3003748, ARO:3003980, ARO:3002987	tetA(48), bcrA, oleC	151.369, 145.591, 129.028	efflux pump complex or subunit conferring antibiotic resistance
Ai.SC002_GM003002 locus=Chr1:3188385:3189167:-				1.39332e-45	sul3	0.342412	ARO:3000412, ARO:3000413	sul2, sul3	127.872, 153.295	antibiotic target replacement protein, determinant of sulfonamide resistance
Ai.SC002_GM000077 locus=Plas1:76812:77429:-				3.39927e-148	APH(3'')-Ib	0.995122	ARO:3002640, ARO:3002639, ARO:3002638	APH(3'')-Ib, APH(3'')-Ic, APH(3'')-Ia	176.792, 413.69, 175.252	antibiotic inactivation enzyme, determinant of aminoglycoside resistance
Ai.SC002_GM002276 locus=Chr1:2380755:2381483:+				5.77389e-38	macB	0.379464	ARO:3003748, ARO:3003980, ARO:3000535	tetA(48), oleC, macB	123.635, 115.931, 137.502	efflux pump complex or subunit conferring antibiotic resistance
Ai.SC002_GM001379 locus=Chr1:1436888:1438096:-				0	mdtH	0.782609	ARO:3001216	mdtH	595.119	efflux pump complex or subunit conferring antibiotic resistance
Ai.SC002_GM002156 locus=Chr1:2253692:2254468:-				3.00717e-38	macB	0.418269	ARO:3003748, ARO:3003980, ARO:3000535	tetA(48), oleC, macB	122.479, 132.109, 138.658	efflux pump complex or subunit conferring antibiotic resistance
Ai.SC002_GM000152 locus=Chr1:40469:41857:-				0	cpxA	0.798687	ARO:3000830, ARO:3003067, ARO:3000829	smeS, cpxA, baeS	692.575, 127.872, 120.939	efflux pump complex or subunit conferring antibiotic resistance, protein(s) and two-component regulatory system modulating antibiotic efflux
Ai.SC002_GM000812 locus=Chr1:794036:794722:+				4.44524e-53	macB	0.422018	ARO:3000535	macB	179.489	efflux pump complex or subunit conferring antibiotic resistance
Ai.SC002_GM001527 locus=Chr1:1590076:1591449:-				2.72231e-139	hmrM	0.47046	ARO:3003953, ARO:3004077, ARO:3000753	abeM, PmpM, hmrM	409.068, 369.392, 293.893	efflux pump complex or subunit conferring antibiotic resistance
Ai.SC002_GM002108 locus=Chr1:2205475:2206755:-				8.17244e-39	Mycobacterium tuberculosis ndh mutant conferring resistance to isoniazid	0.279343	ARO:3003461	Mycobacterium tuberculosis ndh mutant conferring resistance to isoniazid	143.28	antibiotic resistant gene variant or mutant, determinant of isoniazid resistance
Ai.SC002_GM001804 locus=Chr1:1882252:1883448:+				2.49944e-33	bcr-1	0.328446	ARO:3003801	bcr-1	125.946	efflux pump complex or subunit conferring antibiotic resistance
Ai.SC002_GM002594 locus=Chr1:2732984:2733442:-				5.8266e-76	tet34	0.644737	ARO:3002870	tet34	223.787	determinant of tetracycline resistance, protein(s) conferring antibiotic resistance via molecular bypass
Ai.SC002_GM003184 locus=Chr1:3395220:3396569:+				0	TolC	0.713964	ARO:3000237, ARO:3003682	TolC, OpmH	631.328, 234.572	efflux pump complex or subunit conferring antibiotic resistance
Ai.SC002_GM003166 locus=Chr1:3369057:3370331:-				0	Escherichia coli LamB	0.643653	ARO:3004126	Escherichia coli LamB	595.504	gene conferring resistance via absence, protein modulating permeability to antibiotic
Ai.SC002_GM003322 locus=Chr1:3566299:3567384:+				1.34215e-101	Klebsiella pneumoniae OmpK37	0.476056	ARO:3004122	Klebsiella pneumoniae OmpK37	305.449	protein modulating permeability to antibiotic
Ai.SC002_GM000071 locus=Plas1:71627:72841:+				0	floR	0.992574	ARO:3002695, ARO:3002693, ARO:3002698, ARO:3002705, ARO:3002699, ARO:3002812, ARO:3002696, ARO:3002694, ARO:3002691	pp-flo, cmlA, cmlB, floR, cmlA4, cmlA6, cmlB1, cmlA5, cmlA1	368.237, 366.311, 365.155, 780.4, 307.76, 604.749, 364.385, 362.844, 333.954	efflux pump complex or subunit conferring antibiotic resistance
Ai.SC002_GM003087 locus=Chr1:3278985:3279674:-				1.37934e-33	baeR	0.378855	ARO:3003066, ARO:3003728, ARO:3000828	vanRI, smeR, baeR	112.849, 112.849, 120.168	antibiotic resistance gene cluster, cassette, or operon, determinant of resistance to glycopeptide antibiotics, efflux pump complex or subunit conferring antibiotic resistance, protein(s) and two-component regulatory system modulating antibiotic efflux, protein(s) conferring antibiotic resistance via molecular bypass
Ai.SC002_GM002663 locus=Chr1:2810997:2811944:-				3.5679e-45	NmcR	0.333333	ARO:3003665	NmcR	154.836	antibiotic inactivation enzyme, determinant of beta-lactam resistance, gene modulating beta-lactam resistance
Ai.SC002_GM000764 locus=Chr1:743204:743722:-				1.03208e-94	emrR	0.77193	ARO:3000516	emrR	273.092	efflux pump complex or subunit conferring antibiotic resistance, protein(s) and two-component regulatory system modulating antibiotic efflux
Ai.SC002_GM000799 locus=Chr1:777912:780713:-				3.84721e-36	evgS	0.296104	ARO:3000833	evgS	144.05	efflux pump complex or subunit conferring antibiotic resistance, protein(s) and two-component regulatory system modulating antibiotic efflux
Ai.SC002_GM003485 locus=Plas2:71698:72429:+				4.93498e-35	gadX	0.396226	ARO:3000508	gadX	125.176	efflux pump complex or subunit conferring antibiotic resistance, protein(s) and two-component regulatory system modulating antibiotic efflux
Ai.SC002_GM001529 locus=Chr1:1592353:1593741:-				1.38449e-40	tcmA	0.299087	ARO:3003554, ARO:3003962	tcmA, farB	149.828, 132.109	efflux pump complex or subunit conferring antibiotic resistance, protein(s) and two-component regulatory system modulating antibiotic efflux
Ai.SC002_GM003008 locus=Chr1:3194708:3195370:+				2.74467e-40	arlR	0.373272	ARO:3003841, ARO:3002929, ARO:3002922, ARO:3002927, ARO:3002928, ARO:3002921, ARO:3002924, ARO:3003728, ARO:3002919, ARO:3000838	kdpE, arlR, vanRA, vanRB, vanRC, vanRE, vanRI, vanRL, vanRM, vanRN	116.316, 120.553, 112.464, 112.849, 114.005, 134.806, 116.316, 128.642, 131.339, 136.732	antibiotic resistance gene cluster, cassette, or operon, determinant of aminoglycoside resistance, determinant of resistance to glycopeptide antibiotics, efflux pump complex or subunit conferring antibiotic resistance, protein(s) and two-component regulatory system modulating antibiotic efflux, protein(s) conferring antibiotic resistance via molecular bypass
Ai.SC002_GM003206 locus=Chr1:3428968:3430152:-				0	Streptomyces cinnamoneus EF-Tu mutants conferring resistance to elfamycin	0.716456	ARO:3003359	Streptomyces cinnamoneus EF-Tu mutants conferring resistance to elfamycin	587.8	antibiotic resistant gene variant or mutant, determinant of elfamycin resistance, gene involved in self-resistance to antibiotic
Ai.SC002_GM000999 locus=Chr1:1010241:1010624:-				6.20306e-38	tet(D)	0.529412	ARO:3004109, ARO:3000168, ARO:3004108, ARO:3000823	Escherichia coli rob, Enterobacter cloacae rob, ramA, tet(D)	112.849, 124.79, 115.931, 110.923	efflux pump complex or subunit conferring antibiotic resistance, protein modulating permeability to antibiotic, protein(s) and two-component regulatory system modulating antibiotic efflux
Ai.SC002_GM000917 locus=Chr1:918827:919516:-				2.52911e-122	kdpE	0.761261	ARO:3003841, ARO:3002929, ARO:3002922, ARO:3002919, ARO:3000816, ARO:3002924, ARO:3002925, ARO:3002926, ARO:3002928, ARO:3002923, ARO:3002927, ARO:3003728, ARO:3000828, ARO:3003066, ARO:3000838	mtrA, baeR, vanRL, arlR, smeR, vanRA, vanRC, vanRD, vanRE, vanRF, vanRG, vanRI, kdpE, vanRM, vanRN	347.436, 128.257, 135.576, 126.716, 127.872, 136.732, 141.354, 140.584, 130.954, 124.405, 135.961, 149.058, 119.013, 116.316, 152.91	antibiotic resistance gene cluster, cassette, or operon, determinant of aminoglycoside resistance, determinant of resistance to glycopeptide antibiotics, efflux pump complex or subunit conferring antibiotic resistance, protein(s) and two-component regulatory system modulating antibiotic efflux, protein(s) conferring antibiotic resistance via molecular bypass
Ai.SC002_GM000593 locus=Chr1:544102:545325:+				1.0547e-32	vanHB	0.353612	ARO:3002943	vanHB	123.25	antibiotic resistance gene cluster, cassette, or operon, determinant of resistance to glycopeptide antibiotics, protein(s) conferring antibiotic resistance via molecular bypass
Ai.SC002_GM001517 locus=Chr1:1580012:1580842:+				1.48358e-39	chrB	0.417391	ARO:3001301, ARO:3001302	chrB, RlmA(II)	135.961, 138.272	antibiotic target modifying enzyme, determinant of macrolide resistance, gene involved in self-resistance to antibiotic
Ai.SC002_GM003673 locus=Plas3:151804:152535:+				7.69497e-35	gadX	0.396226	ARO:3000508	gadX	124.79	efflux pump complex or subunit conferring antibiotic resistance, protein(s) and two-component regulatory system modulating antibiotic efflux
Ai.SC002_GM002236 locus=Chr1:2340727:2342535:+				2.60498e-47	msbA	0.282759	ARO:3004035, ARO:3002882, ARO:3000489, ARO:3003948, ARO:3004033, ARO:3003950, ARO:3004036, ARO:3004032	tetB(60), tetA(60), tetB(46), sav1866, tetA(46), lmrD, efrA, msbA	145.976, 141.739, 168.318, 129.798, 141.354, 172.555, 159.844, 142.895	efflux pump complex or subunit conferring antibiotic resistance
Ai.SC002_GM001936 locus=Chr1:2016706:2021271:+				1.91922e-50	evgS	0.328294	ARO:3000833	evgS	192.2	efflux pump complex or subunit conferring antibiotic resistance, protein(s) and two-component regulatory system modulating antibiotic efflux
Ai.SC002_GM000763 locus=Chr1:741662:742837:-				0	emrA	0.685422	ARO:3000027, ARO:3003961, ARO:3000206	emrA, emrK, farA	530.791, 300.827, 385.185	efflux pump complex or subunit conferring antibiotic resistance, protein(s) and two-component regulatory system modulating antibiotic efflux
Ai.SC002_GM000033 locus=Plas1:35548:35778:+				4.22463e-50	vgaC	1	ARO:3002831	vgaC	152.14	efflux pump complex or subunit conferring antibiotic resistance
Ai.SC002_GM000343 locus=Chr1:263961:266069:+				1.12104e-79	tetT	0.279942	ARO:3000191, ARO:3000556, ARO:3002891, ARO:3000190, ARO:3000186, ARO:3000196, ARO:3000192, ARO:3000194, ARO:3000197, ARO:3000195, ARO:3000193	tetB(P), tetQ, tet44, tetT, tetW, tetS, tetM, tetO, otr(A), tet36, tet32	238.424, 240.35, 205.682, 212.616, 209.534, 235.343, 231.876, 235.343, 227.254, 255.373, 266.544	antibiotic target protection protein, determinant of tetracycline resistance
Ai.SC002_GM002825 locus=Chr1:3008743:3009627:+				2.93304e-136	Escherichia coli rob	0.667808	ARO:3004109, ARO:3000168, ARO:3004108, ARO:3000263	Escherichia coli rob, Enterobacter cloacae rob, marA, tet(D)	388.267, 135.576, 386.341, 112.079	efflux pump complex or subunit conferring antibiotic resistance, protein modulating permeability to antibiotic, protein(s) and two-component regulatory system modulating antibiotic efflux
Ai.SC002_GM001715 locus=Chr1:1782872:1783204:+				4.27699e-38	qacH	0.627273	ARO:3004039, ARO:3004038, ARO:3003836, ARO:3000768	qacH, abeS, Pseudomonas aeruginosa emrE, Escherichia coli emrE	114.005, 111.694, 124.02, 120.168	efflux pump complex or subunit conferring antibiotic resistance
Ai.SC002_GM001255 locus=Chr1:1295819:1296982:-				1.81467e-168	Klebsiella pneumoniae OmpK37	0.660759	ARO:3004122	Klebsiella pneumoniae OmpK37	477.248	protein modulating permeability to antibiotic
Ai.SC002_GM000386 locus=Chr1:309578:310696:+				7.28587e-167	ACT-28	0.614325	ARO:3002184, ARO:3002076, ARO:3002493, ARO:3001827, ARO:3002071, ARO:3002489, ARO:3002177, ARO:3002498, ARO:3002156, ARO:3002117, ARO:3001850, ARO:3001855, ARO:3002085, ARO:3002153, ARO:3002053, ARO:3002515, ARO:3001825, ARO:3002519, ARO:3003172, ARO:3002049, ARO:3001838, ARO:3002147, ARO:3002092, ARO:3002017, ARO:3001842, ARO:3002034, ARO:3002019, ARO:3001832, ARO:3002095, ARO:3002044, ARO:30021…	LRA-10, LRA-13, LRA-18, CMY-29, MIR-11, CMY-99, CMY-98, CMY-93, CMY-90, CMY-95, CMY-94, CMY-13, DHA-22, CMY-11, CMY-10, CMY-17, CMY-16, CMY-15, CMY-14, DHA-3, DHA-2, DHA-1, CMY-18, DHA-7, DHA-6, DHA-5, FOX-5, FOX-4, FOX-7, CMY-76, FOX-1, FOX-3, FOX-2, FOX-9, FOX-8, ACT-6, ACT-7, ACT-4, ACT-17, ACT-2, ACT-3, ACT-1, ACT-9, CMY-31, MIR-8, MIR-9, MIR-2, MIR-3, MIR-1, MIR-6, MIR-4, MIR-5, CMY-66, CMY-…	326.635, 451.44, 284.648, 466.848, 459.144, 311.227, 465.692, 349.362, 318.546, 459.914, 460.685, 462.996, 454.907, 379.407, 451.825, 335.109, 467.233, 338.576, 469.929, 449.514, 464.151, 378.637, 459.529, 449.899, 467.618, 451.055, 328.946, 466.848, 459.144, 453.751, 458.373, 454.521, 466.848, 467.618, 383.259, 468.774, 461.07, 458.759, 467.618, 334.724, 451.44, 451.055, 464.151, 459.914, 456.44…	antibiotic inactivation enzyme, determinant of beta-lactam resistance
Ai.SC002_GM000495 locus=Chr1:420123:422000:-				2.29898e-36	Streptomyces cinnamoneus EF-Tu mutants conferring resistance to elfamycin	0.294574	ARO:3003359	Streptomyces cinnamoneus EF-Tu mutants conferring resistance to elfamycin	137.502	antibiotic resistant gene variant or mutant, determinant of elfamycin resistance, gene involved in self-resistance to antibiotic
Ai.SC002_GM001024 locus=Chr1:1040365:1041354:-				4.65659e-38	mdtN	0.298742	ARO:3003548	mdtN	137.117	efflux pump complex or subunit conferring antibiotic resistance
Ai.SC002_GM001135 locus=Chr1:1155746:1158772:+				9.80132e-35	evgS	0.326241	ARO:3000833	evgS	139.813	efflux pump complex or subunit conferring antibiotic resistance, protein(s) and two-component regulatory system modulating antibiotic efflux
Ai.SC002_GM002776 locus=Chr1:2946474:2946956:-				5.33069e-52	dfrA3	0.5375	ARO:3002866, ARO:3002868, ARO:3002857, ARO:3003105, ARO:3002869, ARO:3002865	dfrC, dfrD, dfrA26, dfrK, dfrA3, dfrG	117.087, 125.946, 122.865, 163.31, 127.102, 116.316	antibiotic target replacement protein, determinant of diaminopyrimidine resistance
Ai.SC002_GM000486 locus=Chr1:410383:411303:-				2.84961e-39	adeL	0.298969	ARO:3000620	adeL	139.813	efflux pump complex or subunit conferring antibiotic resistance, protein(s) and two-component regulatory system modulating antibiotic efflux
Ai.SC002_GM002369 locus=Chr1:2477544:2480660:+				0	mdtF	0.756286	ARO:3000796, ARO:3002983, ARO:3000804, ARO:3000801, ARO:3003923, ARO:3000216, ARO:3004074, ARO:3000811, ARO:3000781, ARO:3003705, ARO:3003056, ARO:3003033, ARO:3000794, ARO:3000784, ARO:3000502, ARO:3003052, ARO:3003699, ARO:3003693, ARO:3000778, ARO:3000491, ARO:3000790, ARO:3003681, ARO:3003010, ARO:3004144, ARO:3000378, ARO:3004075, ARO:3000808, ARO:3000775, ARO:3000793, ARO:3003031, ARO:30041…	AxyY, mdsB, LpeB, acrB, acrD, smeE, smeB, AcrF, cmeB, mtrD, TriC, mexQ, mexN, mdtB, adeG, amrB, adeB, adeJ, mdtC, oqxB, MexY, MexW, ceoB, MuxB, MuxC, MexK, MexI, MexF, MexD, MexB, mdtF	1260.36, 1016.53, 724.161, 928.317, 711.064, 1389.79, 401.364, 932.939, 1194.49, 354.369, 1228.0, 979.934, 384.415, 799.66, 1347.03, 1095.88, 705.286, 204.527, 737.643, 1651.72, 771.155, 227.254, 764.992, 1095.49, 1313.9, 357.066, 503.442, 957.592, 404.445, 501.13, 413.69	efflux pump complex or subunit conferring antibiotic resistance, protein(s) and two-component regulatory system modulating antibiotic efflux
Ai.SC002_GM000879 locus=Chr1:874157:876052:-				2.0373e-41	mecC	0.285714	ARO:3001209, ARO:3003440, ARO:3000617	mecC, mecB, mecA	155.992, 149.443, 155.221	antibiotic resistance gene cluster, cassette, or operon, antibiotic target replacement protein, determinant of beta-lactam resistance
Ai.SC002_GM001225 locus=Chr1:1262913:1264079:+				0	PmrE	0.809278	ARO:3003577	PmrE	664.84	determinant of polymyxin resistance, gene altering cell wall charge
Ai.SC002_GM002907 locus=Chr1:3095255:3096073:-				3.71371e-159	bacA	0.818519	ARO:3002986	bacA	444.891	determinant of resistance to peptide antibiotics, protein(s) conferring antibiotic resistance via molecular bypass
Ai.SC002_GM001385 locus=Chr1:1444337:1445479:-				2.36248e-53	patB	0.298701	ARO:3000025	patB	181.03	efflux pump complex or subunit conferring antibiotic resistance
Ai.SC002_GM002860 locus=Chr1:3049415:3050671:-				1.29822e-107	Mycobacterium tuberculosis intrinsic murA conferring resistance to fosfomycin	0.444712	ARO:3003784, ARO:3003785	Mycobacterium tuberculosis intrinsic murA conferring resistance to fosfomycin, Chlamydia trachomatis intrinsic murA conferring resistance to fosfomycin	324.709, 214.157	antibiotic resistant gene variant or mutant, determinant of fosfomycin resistance
Ai.SC002_GM002344 locus=Chr1:2453273:2453995:+				4.63673e-42	macB	0.383333	ARO:3003748, ARO:3003980, ARO:3000535	tetA(48), oleC, macB	122.094, 121.709, 148.673	efflux pump complex or subunit conferring antibiotic resistance
Ai.SC002_GM000137 locus=Chr1:25487:27568:-				8.07904e-75	mfd	0.392771	ARO:3003844	mfd	259.225	antibiotic target protection protein, determinant of fluoroquinolone resistance
Ai.SC002_GM002393 locus=Chr1:2504685:2505326:-				7.19105e-50	arlR	0.427778	ARO:3003841, ARO:3000553, ARO:3002929, ARO:3003066, ARO:3004054, ARO:3002922, ARO:3000828, ARO:3000816, ARO:3002924, ARO:3002925, ARO:3002926, ARO:3002928, ARO:3002923, ARO:3002927, ARO:3003728, ARO:3002919, ARO:3004055, ARO:3000838	Pseudomonas aeruginosa CpxR, baeR, adeR, vanRA, vanRL, arlR, Escherichia coli CpxR, vanRM, vanRI, vanRC, vanRD, vanRE, vanRF, vanRG, mtrA, kdpE, smeR, vanRN	124.79, 130.568, 130.568, 142.124, 132.109, 123.25, 154.066, 124.02, 124.405, 134.42, 112.849, 126.716, 116.316, 119.398, 141.354, 128.642, 121.709, 161.384	antibiotic resistance gene cluster, cassette, or operon, determinant of aminoglycoside resistance, determinant of resistance to glycopeptide antibiotics, efflux pump complex or subunit conferring antibiotic resistance, protein(s) and two-component regulatory system modulating antibiotic efflux, protein(s) conferring antibiotic resistance via molecular bypass
Ai.SC002_GM001809 locus=Chr1:1889893:1891245:-				6.89197e-103	OprM	0.427313	ARO:3000779, ARO:3004142, ARO:3000782, ARO:3003057, ARO:3000785, ARO:3003039, ARO:3000802, ARO:3003811, ARO:3000379, ARO:3003053, ARO:3000809, ARO:3000791, ARO:3000812, ARO:3000805, ARO:3003037, ARO:3004072	mtrE, OprJ, mdsC, OprN, OprM, OpmB, adeH, OprA, adeC, smeC, OpmD, OprZ, opcM, smeF, cmeC, adeK	173.711, 305.449, 252.677, 300.056, 162.925, 302.753, 266.544, 239.195, 315.849, 286.96, 155.221, 291.197, 265.388, 138.272, 139.428, 165.236	efflux pump complex or subunit conferring antibiotic resistance, protein(s) and two-component regulatory system modulating antibiotic efflux
Ai.SC002_GM001673 locus=Chr1:1732729:1733874:-				7.13274e-173	Klebsiella pneumoniae OmpK37	0.679487	ARO:3004122	Klebsiella pneumoniae OmpK37	488.034	protein modulating permeability to antibiotic
Ai.SC002_GM001140 locus=Chr1:1164553:1166289:-				3.42304e-49	tetA(48)	0.383966	ARO:3003980, ARO:3003980, ARO:3003748, ARO:3003748, ARO:3002987, ARO:3002987	tetA(48), bcrA, oleC	172.555, 130.568, 155.606, 153.295, 144.436, 145.206	efflux pump complex or subunit conferring antibiotic resistance
Ai.SC002_GM003691 locus=Plas4:24340:26163:-				3.08964e-82	sav1866	0.365145	ARO:3004035, ARO:3000489, ARO:3002882, ARO:3002522, ARO:3003948, ARO:3004033, ARO:3002881, ARO:3003950, ARO:3004036, ARO:3003949, ARO:3004032	tetB(60), tetA(60), tetB(46), sav1866, novA, tetA(46), lmrD, lmrC, efrB, efrA, msbA	168.703, 269.24, 207.994, 221.476, 169.088, 176.022, 178.718, 227.639, 185.267, 162.155, 147.902	efflux pump complex or subunit conferring antibiotic resistance
Ai.SC002_GM001976 locus=Chr1:2064341:2065585:-				6.08863e-80	bcr-1	0.452316	ARO:3003801	bcr-1	252.292	efflux pump complex or subunit conferring antibiotic resistance
Ai.SC002_GM002403 locus=Chr1:2515825:2518956:+				0	mexN	0.735977	ARO:3000796, ARO:3002983, ARO:3003010, ARO:3000801, ARO:3003923, ARO:3000216, ARO:3000778, ARO:3000811, ARO:3000781, ARO:3003705, ARO:3003056, ARO:3003033, ARO:3000794, ARO:3000784, ARO:3000502, ARO:3003052, ARO:3003699, ARO:3003693, ARO:3004074, ARO:3000491, ARO:3000790, ARO:3003681, ARO:3000804, ARO:3004144, ARO:3000378, ARO:3004075, ARO:3000808, ARO:3000775, ARO:3000793, ARO:3003031, ARO:30041…	AxyY, mdsB, LpeB, acrB, acrD, smeE, smeB, AcrF, cmeB, mtrD, TriC, mexQ, mexN, mdtB, adeG, amrB, adeB, adeJ, mdtC, oqxB, ceoB, MexW, MexY, MuxB, MuxC, MexK, MexI, MexF, MexD, MexB, mdtF	399.823, 400.979, 395.586, 337.421, 361.303, 380.948, 366.311, 354.755, 407.527, 945.266, 394.815, 391.349, 929.087, 394.43, 379.022, 390.578, 412.92, 227.639, 1294.64, 424.091, 370.548, 233.417, 360.918, 402.519, 375.555, 868.226, 452.595, 384.03, 1486.86, 430.254, 447.973	efflux pump complex or subunit conferring antibiotic resistance, protein(s) and two-component regulatory system modulating antibiotic efflux
Ai.SC002_GM001720 locus=Chr1:1785433:1786428:-				2.78642e-54	vanHD	0.366534	ARO:3002948, ARO:3002947, ARO:3002944, ARO:3002945, ARO:3002942, ARO:3002943	vanHB, vanHA, vanHF, vanHD, vanHO, vanHM	171.785, 167.162, 180.259, 169.859, 167.162, 169.859	antibiotic resistance gene cluster, cassette, or operon, determinant of resistance to glycopeptide antibiotics, protein(s) conferring antibiotic resistance via molecular bypass
Ai.SC002_GM001134 locus=Chr1:1153079:1155712:+				0	Mycobacterium tuberculosis gyrA conferring resistance to fluoroquinolones	0.45741	ARO:3003295, ARO:3003941	Mycobacterium tuberculosis gyrA conferring resistance to fluoroquinolones, Shigella flexneri parC conferring resistance to fluoroquinolones	751.895, 400.593	antibiotic resistant gene variant or mutant, determinant of fluoroquinolone resistance
Ai.SC002_GM000729 locus=Chr1:702850:704085:+				9.55358e-53	clbB	0.331395	ARO:3002814, ARO:3003441, ARO:3002815, ARO:3004146, ARO:3002816, ARO:3003907	clbC, clbB, clbA, cipA, cfrA, cfrC	141.354, 169.088, 179.104, 164.081, 163.696, 170.244	antibiotic target modifying enzyme, determinant of lincosamide resistance, determinant of linezolid resistance, determinant of macrolide resistance, determinant of phenicol resistance, determinant of streptogramin resistance
Ai.SC002_GM000576 locus=Chr1:520771:521178:+				8.96303e-41	H-NS	0.588235	ARO:3000676	H-NS	132.494	efflux pump complex or subunit conferring antibiotic resistance, protein(s) and two-component regulatory system modulating antibiotic efflux
Ai.SC002_GM002103 locus=Chr1:2198087:2198806:-				3.25306e-49	macB	0.369369	ARO:3000535	macB	169.088	efflux pump complex or subunit conferring antibiotic resistance
Ai.SC002_GM001961 locus=Chr1:2048492:2049418:+				2.58862e-52	PmrF	0.321543	ARO:3003578	PmrF	174.096	determinant of polymyxin resistance, gene altering cell wall charge
Ai.SC002_GM000377 locus=Chr1:287080:288027:-				2.30474e-36	arnA	0.316794	ARO:3002985, ARO:3002985	arnA	121.709, 135.191	determinant of polymyxin resistance, gene altering cell wall charge
Ai.SC002_GM002404 locus=Chr1:2518953:2522033:+				0	mexN	0.74165	ARO:3000796, ARO:3002983, ARO:3003010, ARO:3000801, ARO:3003923, ARO:3000216, ARO:3000778, ARO:3000811, ARO:3000781, ARO:3003705, ARO:3003056, ARO:3003033, ARO:3000794, ARO:3000784, ARO:3000502, ARO:3003052, ARO:3003699, ARO:3003693, ARO:3004074, ARO:3000491, ARO:3000790, ARO:3003681, ARO:3000804, ARO:3004144, ARO:3000378, ARO:3004075, ARO:3000808, ARO:3000775, ARO:3000793, ARO:3003031, ARO:30041…	AxyY, mdsB, LpeB, acrB, acrD, smeE, smeB, AcrF, cmeB, mtrD, TriC, mexQ, mexN, mdtB, adeG, amrB, adeB, adeJ, mdtC, oqxB, ceoB, MexW, MexY, MuxB, MuxC, MexK, MexI, MexF, MexD, MexB, mdtF	372.474, 384.03, 391.349, 346.665, 325.479, 374.785, 364.77, 328.946, 376.711, 862.448, 379.793, 411.764, 1488.78, 389.423, 373.244, 358.992, 398.282, 198.749, 912.524, 384.415, 379.022, 153.68, 364.77, 392.504, 402.134, 1127.85, 404.831, 390.963, 875.93, 413.69, 425.246	efflux pump complex or subunit conferring antibiotic resistance, protein(s) and two-component regulatory system modulating antibiotic efflux
Ai.SC002_GM000344 locus=Chr1:266139:267323:+				0	Streptomyces cinnamoneus EF-Tu mutants conferring resistance to elfamycin	0.713924	ARO:3003359	Streptomyces cinnamoneus EF-Tu mutants conferring resistance to elfamycin	585.874	antibiotic resistant gene variant or mutant, determinant of elfamycin resistance, gene involved in self-resistance to antibiotic
Ai.SC002_GM000073 locus=Plas1:73441:74715:-				5.93961e-170	tet(G)	0.81383	ARO:3000183, ARO:3000476, ARO:3000566, ARO:3000165, ARO:3000569, ARO:3000177, ARO:3000173, ARO:3000478, ARO:3000561, ARO:3000174, ARO:3000572, ARO:3000175, ARO:3000182, ARO:3000166, ARO:3000167	tet(Z), tet(E), tet(G), tet(H), tet(33), tet(J), tet(31), tet(30), tet(A), tet(42), tet(B), tet(39), tet(C), tet(Y), tet(41)	340.887, 318.161, 372.474, 371.703, 395.201, 355.91, 399.053, 331.643, 328.946, 483.026, 153.295, 350.903, 419.083, 370.933, 295.049	efflux pump complex or subunit conferring antibiotic resistance
Ai.SC002_GM003461 locus=Plas2:50274:52283:+				2.50936e-56	novA	0.349091	ARO:3000489, ARO:3002882, ARO:3003949, ARO:3002881, ARO:3003950, ARO:3004036, ARO:3002522	tetB(60), sav1866, novA, lmrD, lmrC, efrB, msbA	199.519, 179.489, 141.354, 131.339, 138.272, 125.946, 200.29	efflux pump complex or subunit conferring antibiotic resistance
Ai.SC002_GM002872 locus=Chr1:3058253:3058978:+				1.17493e-31	tetA(48)	0.347032	ARO:3003980	tetA(48)	117.087	efflux pump complex or subunit conferring antibiotic resistance
Ai.SC002_GM002830 locus=Chr1:3013759:3015405:+				4.59035e-115	TaeA	0.403409	ARO:3002817, ARO:3002817, ARO:3000616, ARO:3003986, ARO:3000118, ARO:3003749, ARO:3002828, ARO:3002832, ARO:3003036, ARO:3003206, ARO:3003109, ARO:3000300, ARO:3002830, ARO:3003112, ARO:3003111, ARO:3002829, ARO:3002819, ARO:3002833, ARO:3002827	tlrC, srmB, lsaC, msrC, mel, vgaD, msrE, vgaB, lsaE, lsaA, vgaA, vgaALC, TaeA, oleB, salA, carA, lsaB, vgaE	125.946, 223.402, 172.94, 355.91, 191.045, 169.474, 205.682, 177.178, 202.216, 135.961, 152.14, 133.65, 165.622, 132.88, 122.865, 167.548, 167.933, 192.971, 197.978	efflux pump complex or subunit conferring antibiotic resistance
Ai.SC002_GM000997 locus=Chr1:1007974:1009545:+				1.33029e-61	TaeA	0.338542	ARO:3002817, ARO:3000616, ARO:3003986, ARO:3000118, ARO:3003749, ARO:3002828, ARO:3002832, ARO:3003036, ARO:3003206, ARO:3003109, ARO:3002827, ARO:3002830, ARO:3003112, ARO:3003111, ARO:3002829, ARO:3002819, ARO:3002833	tlrC, srmB, lsaC, msrC, mel, vgaD, msrE, vgaB, lsaE, vgaA, vgaALC, TaeA, oleB, salA, carA, lsaB, vgaE	198.364, 171.4, 212.616, 193.741, 184.496, 188.348, 202.986, 193.356, 144.05, 164.851, 186.808, 181.03, 144.436, 147.902, 182.57, 146.747, 193.741	efflux pump complex or subunit conferring antibiotic resistance
Ai.SC002_GM003626 locus=Plas3:87786:88130:-				2.16817e-43	Klebsiella pneumoniae OmpK37	0.634783	ARO:3004122	Klebsiella pneumoniae OmpK37	144.821	protein modulating permeability to antibiotic
Ai.SC002_GM000076 locus=Plas1:75976:76812:-				0	APH(6)-Id	0.996403	ARO:3002660	APH(6)-Id	568.155	antibiotic inactivation enzyme, determinant of aminoglycoside resistance
Ai.SC002_GM002097 locus=Chr1:2191605:2192279:+				2.94054e-37	kdpE	0.346847	ARO:3003841, ARO:3002921, ARO:3000838, ARO:3003728, ARO:3002919	vanRI, vanRB, arlR, kdpE, vanRA	129.413, 112.079, 114.39, 115.161, 112.849	antibiotic resistance gene cluster, cassette, or operon, determinant of aminoglycoside resistance, determinant of resistance to glycopeptide antibiotics, efflux pump complex or subunit conferring antibiotic resistance, protein(s) and two-component regulatory system modulating antibiotic efflux, protein(s) conferring antibiotic resistance via molecular bypass
Ai.SC002_GM002551 locus=Chr1:2687849:2689954:+				0	Mycobacterium tuberculosis katG mutations conferring resistance to isoniazid	0.577031	ARO:3003392, ARO:3003392	Mycobacterium tuberculosis katG mutations conferring resistance to isoniazid	760.755, 760.755	antibiotic resistant gene variant or mutant, determinant of isoniazid resistance
Ai.SC002_GM000762 locus=Chr1:740109:741605:-				0	emrY	0.799197	ARO:3003554, ARO:3001313, ARO:3002813, ARO:3003955, ARO:3000254, ARO:3003962, ARO:3000074	emrY, efpA, farB, tcmA, emrB, lmrB, facT	142.124, 129.028, 136.732, 134.035, 626.706, 596.66, 802.357	determinant of elfamycin resistance, efflux pump complex or subunit conferring antibiotic resistance, protein(s) and two-component regulatory system modulating antibiotic efflux
Ai.SC002_GM001144 locus=Chr1:1169722:1170075:-				3.36138e-31	Enterobacter cloacae rob	0.504762	ARO:3004108	Enterobacter cloacae rob	110.538	efflux pump complex or subunit conferring antibiotic resistance, protein(s) and two-component regulatory system modulating antibiotic efflux
Ai.SC002_GM000039 locus=Plas1:39649:40509:+				0	TEM-1	1	ARO:3000873	TEM-1	591.267	antibiotic inactivation enzyme, determinant of beta-lactam resistance
Ai.SC002_GM002790 locus=Chr1:2961098:2963944:-				3.38034e-60	Bifidobacteria intrinsic ileS conferring resistance to mupirocin	0.25058	ARO:3003730	Bifidobacteria intrinsic ileS conferring resistance to mupirocin	219.935	antibiotic resistant gene variant or mutant, determinant of mupirocin resistance
Ai.SC002_GM000331 locus=Chr1:256586:258409:+				3.02885e-38	rosB	0.273369	ARO:3003049	rosB	145.206	efflux pump complex or subunit conferring antibiotic resistance
Ai.SC002_GM003364 locus=Chr1:3616650:3618071:+				7.55264e-39	farB	0.298795	ARO:3000254, ARO:3003962, ARO:3000074	emrY, emrB, farB	142.895, 144.821, 144.436	efflux pump complex or subunit conferring antibiotic resistance, protein(s) and two-component regulatory system modulating antibiotic efflux
Ai.SC002_GM000217 locus=Chr1:121088:122194:-				1.20935e-76	vanL	0.435897	ARO:3002908, ARO:3000368, ARO:3002913, ARO:3002910, ARO:3002911, ARO:3000013, ARO:3000005, ARO:3000010, ARO:3003723, ARO:3002909, ARO:3002912, ARO:3002907	vanA, vanC, vanB, vanE, vanD, vanG, vanF, vanI, vanM, vanL, vanO, vanN	221.476, 213.772, 235.343, 240.35, 229.18, 236.884, 228.794, 232.261, 123.635, 224.172, 229.95, 214.542	antibiotic resistance gene cluster, cassette, or operon, determinant of resistance to glycopeptide antibiotics, protein(s) conferring antibiotic resistance via molecular bypass
Ai.SC002_GM003085 locus=Chr1:3275050:3277800:-				1.64379e-32	evgS	0.305233	ARO:3000833	evgS	132.494	efflux pump complex or subunit conferring antibiotic resistance, protein(s) and two-component regulatory system modulating antibiotic efflux
Ai.SC002_GM002348 locus=Chr1:2457548:2458744:-				2.42489e-77	bcr-1	0.414365	ARO:3002695, ARO:3001215, ARO:3002698, ARO:3002693, ARO:3003801, ARO:3002696, ARO:3002694, ARO:3002691	cmlA, cmlB, cmlA6, cmlA4, cmlA5, cmlA1, bcr-1, mdtL	136.732, 120.939, 125.561, 135.576, 244.973, 139.428, 132.109, 131.724	efflux pump complex or subunit conferring antibiotic resistance
Ai.SC002_GM001546 locus=Chr1:1608350:1610383:+				3.24486e-43	mecC	0.278912	ARO:3001209, ARO:3000617	mecC, mecA	161.77, 139.813	antibiotic resistance gene cluster, cassette, or operon, antibiotic target replacement protein, determinant of beta-lactam resistance
Ai.SC002_GM002451 locus=Chr1:2570788:2571483:-				9.48729e-45	AcrS	0.413793	ARO:3000656	AcrS	149.058	efflux pump complex or subunit conferring antibiotic resistance, protein(s) and two-component regulatory system modulating antibiotic efflux
Ai.SC002_GM000153 locus=Chr1:41854:42552:-				5.5154e-143	Escherichia coli CpxR	0.900862	ARO:3000553, ARO:3002929, ARO:3004054, ARO:3002922, ARO:3002919, ARO:3000816, ARO:3002924, ARO:3002925, ARO:3002926, ARO:3002928, ARO:3002923, ARO:3002927, ARO:3003728, ARO:3000828, ARO:3002921, ARO:3004055, ARO:3003066, ARO:3000838	mtrA, baeR, adeR, smeR, arlR, Escherichia coli CpxR, vanRI, vanRA, vanRB, vanRC, vanRD, vanRE, vanRF, vanRG, Pseudomonas aeruginosa CpxR, vanRL, vanRM, vanRN	132.88, 150.599, 189.889, 154.836, 154.836, 130.183, 150.214, 149.058, 147.132, 158.688, 136.732, 146.362, 153.295, 152.525, 119.398, 400.593, 143.665, 146.747	antibiotic resistance gene cluster, cassette, or operon, determinant of resistance to glycopeptide antibiotics, efflux pump complex or subunit conferring antibiotic resistance, protein(s) and two-component regulatory system modulating antibiotic efflux, protein(s) conferring antibiotic resistance via molecular bypass
Ai.SC002_GM001731 locus=Chr1:1800246:1801556:-				3.13632e-37	cpxA	0.332075	ARO:3000830	cpxA	138.658	efflux pump complex or subunit conferring antibiotic resistance, protein(s) and two-component regulatory system modulating antibiotic efflux
Ai.SC002_GM002555 locus=Chr1:2692668:2693525:+				1.09926e-37	Enterobacter cloacae rob	0.291096	ARO:3004109, ARO:3004108	Escherichia coli rob, Enterobacter cloacae rob	118.242, 133.65	efflux pump complex or subunit conferring antibiotic resistance, protein(s) and two-component regulatory system modulating antibiotic efflux
Ai.SC002_GM003571 locus=Plas3:32114:32845:+				7.69497e-35	gadX	0.396226	ARO:3000508	gadX	124.79	efflux pump complex or subunit conferring antibiotic resistance, protein(s) and two-component regulatory system modulating antibiotic efflux
Ai.SC002_GM000298 locus=Chr1:219363:220082:+				1.03156e-55	vanRI	0.415254	ARO:3003841, ARO:3000553, ARO:3002929, ARO:3004054, ARO:3002922, ARO:3000828, ARO:3000816, ARO:3002927, ARO:3002925, ARO:3002926, ARO:3002928, ARO:3002923, ARO:3002924, ARO:3003728, ARO:3002919, ARO:3004055, ARO:3003066, ARO:3000838	Pseudomonas aeruginosa CpxR, adeR, baeR, vanRA, vanRL, arlR, Escherichia coli CpxR, smeR, vanRI, vanRC, vanRD, vanRE, vanRF, vanRG, mtrA, kdpE, vanRM, vanRN	123.635, 125.176, 149.058, 161.384, 147.132, 151.754, 139.428, 155.221, 145.206, 150.214, 148.673, 135.191, 139.043, 177.948, 171.785, 147.517, 143.28, 129.028	antibiotic resistance gene cluster, cassette, or operon, determinant of aminoglycoside resistance, determinant of resistance to glycopeptide antibiotics, efflux pump complex or subunit conferring antibiotic resistance, protein(s) and two-component regulatory system modulating antibiotic efflux, protein(s) conferring antibiotic resistance via molecular bypass
Ai.SC002_GM000059 locus=Plas1:64335:64991:-				4.15721e-165	QnrS1	1	ARO:3002790	QnrS1	455.292	antibiotic target protection protein, determinant of fluoroquinolone resistance
Ai.SC002_GM002841 locus=Chr1:3025662:3027956:-				2.14206e-48	evgS	0.270106	ARO:3000833	evgS	181.415	efflux pump complex or subunit conferring antibiotic resistance, protein(s) and two-component regulatory system modulating antibiotic efflux
Ai.SC002_GM002740 locus=Chr1:2898525:2899448:-				3.68166e-56	vanG	0.347656	ARO:3002909, ARO:3002908, ARO:3000368, ARO:3002913, ARO:3002910, ARO:3002912, ARO:3000013, ARO:3000005, ARO:3000010, ARO:3002911, ARO:3002907	vanA, vanC, vanB, vanE, vanD, vanG, vanF, vanM, vanL, vanO, vanN	184.882, 151.369, 154.066, 140.198, 176.022, 163.31, 127.102, 136.346, 142.51, 148.673, 164.081	antibiotic resistance gene cluster, cassette, or operon, determinant of resistance to glycopeptide antibiotics, protein(s) conferring antibiotic resistance via molecular bypass
Ai.SC002_GM002237 locus=Chr1:2342589:2344268:+				4.19197e-54	msbA	0.325333	ARO:3004035, ARO:3000489, ARO:3002882, ARO:3002522, ARO:3003948, ARO:3004033, ARO:3002881, ARO:3003950, ARO:3004036, ARO:3004032	tetB(60), tetA(60), tetB(46), sav1866, novA, tetA(46), lmrD, lmrC, efrA, msbA	165.622, 167.548, 163.696, 163.31, 135.191, 129.028, 150.984, 191.43, 159.844, 147.517	efflux pump complex or subunit conferring antibiotic resistance
Ai.SC002_GM002406 locus=Chr1:2523485:2524228:+				7.76433e-117	baeR	0.742358	ARO:3000553, ARO:3002929, ARO:3003066, ARO:3004054, ARO:3002922, ARO:3002919, ARO:3000816, ARO:3002924, ARO:3002925, ARO:3002926, ARO:3002928, ARO:3002921, ARO:3002927, ARO:3003728, ARO:3000828, ARO:3004055, ARO:3002923, ARO:3000838	baeR, Pseudomonas aeruginosa CpxR, vanRI, adeR, arlR, Escherichia coli CpxR, vanRM, vanRA, vanRB, vanRC, vanRD, vanRE, vanRF, vanRG, mtrA, vanRL, smeR, vanRN	136.732, 133.65, 244.202, 117.472, 134.035, 150.984, 125.176, 130.954, 139.813, 144.821, 134.035, 114.39, 138.658, 155.992, 335.109, 124.405, 133.65, 149.058	antibiotic resistance gene cluster, cassette, or operon, determinant of resistance to glycopeptide antibiotics, efflux pump complex or subunit conferring antibiotic resistance, protein(s) and two-component regulatory system modulating antibiotic efflux, protein(s) conferring antibiotic resistance via molecular bypass
Ai.SC002_GM001266 locus=Chr1:1310202:1312112:+				5.89293e-107	TaeA	0.345771	ARO:3002817, ARO:3000616, ARO:3003986, ARO:3000118, ARO:3003749, ARO:3002828, ARO:3003109, ARO:3003036, ARO:3003206, ARO:3002832, ARO:3003111, ARO:3002830, ARO:3003112, ARO:3000300, ARO:3002829, ARO:3002819, ARO:3002833, ARO:3002827	tlrC, srmB, lsaC, msrC, mel, vgaD, msrE, vgaB, lsaE, lsaA, vgaA, vgaALC, TaeA, oleB, salA, carA, lsaB, vgaE	208.764, 158.303, 337.421, 194.126, 196.052, 209.149, 174.481, 188.734, 128.257, 174.096, 131.724, 171.014, 132.88, 125.561, 172.17, 163.696, 199.519, 175.637	efflux pump complex or subunit conferring antibiotic resistance
Ai.SC002_GM001806 locus=Chr1:1884952:1888110:-				5.27412e-59	mexN	0.273469	ARO:3000796, ARO:3002983, ARO:3000804, ARO:3000801, ARO:3003923, ARO:3000216, ARO:3000811, ARO:3000781, ARO:3003705, ARO:3003056, ARO:3003033, ARO:3000794, ARO:3000784, ARO:3000502, ARO:3003052, ARO:3003693, ARO:3004074, ARO:3000491, ARO:3000790, ARO:3003681, ARO:3003010, ARO:3004144, ARO:3000378, ARO:3004075, ARO:3000808, ARO:3000775, ARO:3000793, ARO:3003031, ARO:3004100	AxyY, mdsB, LpeB, acrB, acrD, smeE, smeB, AcrF, cmeB, mtrD, TriC, mexN, mdtB, amrB, adeB, adeJ, mdtC, oqxB, MexY, MexW, ceoB, MuxB, MuxC, MexK, MexI, MexF, MexD, MexB, mdtF	181.415, 193.356, 171.014, 182.956, 172.94, 188.348, 201.06, 195.667, 216.853, 184.496, 181.03, 195.667, 216.083, 183.726, 142.895, 162.925, 210.305, 178.333, 167.548, 171.785, 131.339, 170.244, 140.969, 209.149, 147.132, 207.608, 180.644, 135.191, 198.364	efflux pump complex or subunit conferring antibiotic resistance, protein(s) and two-component regulatory system modulating antibiotic efflux
Ai.SC002_GM002518 locus=Chr1:2645163:2646020:-				3.84801e-31	mdtN	0.298701	ARO:3003548	mdtN	116.701	efflux pump complex or subunit conferring antibiotic resistance
Ai.SC002_GM002452 locus=Chr1:2571771:2572808:+				4.65231e-166	AcrE	0.730435	ARO:3003922, ARO:3000803, ARO:3000792, ARO:3000800, ARO:3002982, ARO:3000777, ARO:3000774, ARO:3004043, ARO:3000377, ARO:3004042, ARO:3003055, ARO:3004143, ARO:3000810, ARO:3000780, ARO:3000795, ARO:3003051, ARO:3000499, ARO:3000789, ARO:3004041, ARO:3004073, ARO:3003704, ARO:3003034, ARO:3000783, ARO:3003698	AxyX, mdsA, Escherichia coli acrA, Enterobacter cloacae acrA, smeD, smeA, AcrE, cmeA, mtrC, amrA, mexP, mdtA, mexM, adeA, mdtE, adeI, Klebsiella pneumoniae acrA, oqxA, MexX, adeF, MuxA, MexE, MexC, MexA	150.984, 146.747, 132.494, 282.337, 226.868, 176.407, 231.876, 468.774, 386.726, 466.848, 350.903, 252.292, 271.937, 304.294, 414.461, 291.582, 469.929, 139.043, 470.315, 163.31, 127.102, 200.675, 150.984, 137.887	efflux pump complex or subunit conferring antibiotic resistance, protein(s) and two-component regulatory system modulating antibiotic efflux
Ai.SC002_GM000188 locus=Chr1:81025:81471:+				3.85074e-40	gadX	0.466165	ARO:3000508	gadX	135.191	efflux pump complex or subunit conferring antibiotic resistance, protein(s) and two-component regulatory system modulating antibiotic efflux
Ai.SC002_GM001468 locus=Chr1:1531364:1531774:-				3.193e-71	H-NS	0.875	ARO:3000676	H-NS	210.305	efflux pump complex or subunit conferring antibiotic resistance, protein(s) and two-component regulatory system modulating antibiotic efflux
Ai.SC002_GM002206 locus=Chr1:2301702:2303456:-				0	msbA	0.827055	ARO:3004035, ARO:3000489, ARO:3002882, ARO:3002522, ARO:3003948, ARO:3004033, ARO:3002881, ARO:3003950, ARO:3004036, ARO:3003949, ARO:3004032	tetB(60), tetA(60), tetB(46), sav1866, novA, tetA(46), lmrD, lmrC, efrB, efrA, msbA	220.32, 341.273, 266.159, 323.168, 218.779, 277.715, 196.823, 1004.59, 258.455, 170.244, 205.682	efflux pump complex or subunit conferring antibiotic resistance
Ai.SC002_GM000258 locus=Chr1:169065:169736:+				6.9881e-35	macB	0.351759	ARO:3000535	macB	128.257	efflux pump complex or subunit conferring antibiotic resistance
Ai.SC002_GM001810 locus=Chr1:1891468:1892283:+				5.09125e-48	arlR	0.415525	ARO:3003841, ARO:3002929, ARO:3004054, ARO:3002922, ARO:3002930, ARO:3000816, ARO:3002924, ARO:3002926, ARO:3002928, ARO:3002921, ARO:3002927, ARO:3003728, ARO:3000828, ARO:3000838	mtrA, baeR, vanRL, arlR, vanRI, vanRB, vanRC, vanRE, vanRG, Pseudomonas aeruginosa CpxR, kdpE, vanRM, vanRN, vanRO	116.701, 117.087, 119.013, 126.331, 125.176, 135.576, 129.798, 121.324, 117.472, 136.346, 118.627, 123.635, 115.546, 158.688	antibiotic resistance gene cluster, cassette, or operon, determinant of aminoglycoside resistance, determinant of resistance to glycopeptide antibiotics, efflux pump complex or subunit conferring antibiotic resistance, protein(s) and two-component regulatory system modulating antibiotic efflux, protein(s) conferring antibiotic resistance via molecular bypass
Ai.SC002_GM002453 locus=Chr1:2572853:2576008:+				0	mdtF	0.809342	ARO:3000796, ARO:3002983, ARO:3000804, ARO:3000801, ARO:3003923, ARO:3000216, ARO:3004074, ARO:3000811, ARO:3000781, ARO:3003705, ARO:3003056, ARO:3003033, ARO:3000794, ARO:3000784, ARO:3000502, ARO:3003052, ARO:3003699, ARO:3003693, ARO:3000778, ARO:3000491, ARO:3000790, ARO:3003681, ARO:3003010, ARO:3004144, ARO:3000378, ARO:3004075, ARO:3000808, ARO:3000775, ARO:3000793, ARO:3003031, ARO:30041…	AxyY, mdsB, LpeB, acrB, acrD, smeE, smeB, AcrF, cmeB, mtrD, TriC, mexQ, mexN, mdtB, adeG, amrB, adeB, adeJ, mdtC, oqxB, MexY, MexW, ceoB, MuxB, MuxC, MexK, MexI, MexF, MexD, MexB, mdtF	1611.28, 1043.11, 750.74, 950.658, 733.406, 1734.54, 372.859, 1010.36, 1246.11, 351.288, 1291.17, 954.51, 353.984, 785.408, 1659.43, 1056.59, 704.516, 188.348, 746.503, 1373.99, 772.696, 194.897, 754.207, 1093.18, 1437.94, 370.163, 471.47, 976.852, 367.081, 520.776, 399.053	efflux pump complex or subunit conferring antibiotic resistance, protein(s) and two-component regulatory system modulating antibiotic efflux
Ai.SC002_GM000967 locus=Chr1:974058:975359:-				1.01669e-42	patA	0.349153	ARO:3000024	patA	154.836	efflux pump complex or subunit conferring antibiotic resistance
Ai.SC002_GM001290 locus=Chr1:1339282:1340262:+				0	PmrF	0.752322	ARO:3003578	PmrF	524.628	determinant of polymyxin resistance, gene altering cell wall charge
Ai.SC002_GM001234 locus=Chr1:1274524:1276110:-				0	MCR-3	0.522727	ARO:3004139, ARO:3003576, ARO:3003689, ARO:3004110	PmrC, MCR-1, MCR-2, MCR-3	598.971, 412.92, 325.865, 320.087	determinant of polymyxin resistance, gene altering cell wall charge
Ai.SC002_GM001732 locus=Chr1:1801561:1802280:-				1.22195e-35	vanRI	0.361702	ARO:3002923, ARO:3000828, ARO:3002924, ARO:3002926, ARO:3002928, ARO:3003728, ARO:3002919, ARO:3003066	baeR, smeR, vanRA, vanRD, vanRE, vanRG, vanRI, vanRM	114.39, 125.176, 119.013, 120.168, 121.324, 125.561, 115.161, 119.398	antibiotic resistance gene cluster, cassette, or operon, determinant of resistance to glycopeptide antibiotics, efflux pump complex or subunit conferring antibiotic resistance, protein(s) and two-component regulatory system modulating antibiotic efflux, protein(s) conferring antibiotic resistance via molecular bypass
Ai.SC002_GM003341 locus=Chr1:3586640:3587875:+				0	MdfA	0.740196	ARO:3001214, ARO:3001328	MdfA, mdtM	331.643, 605.134	efflux pump complex or subunit conferring antibiotic resistance
Ai.SC002_GM003142 locus=Chr1:3342566:3343657:-				1.535e-44	vanTrL	0.350932	ARO:3002970, ARO:3002974, ARO:3002971, ARO:3002975, ARO:3002972	vanTN, vanTrL, vanTE, vanTC, vanTG	159.073, 156.377, 151.754, 151.754, 147.517	antibiotic resistance gene cluster, cassette, or operon, determinant of resistance to glycopeptide antibiotics, protein(s) conferring antibiotic resistance via molecular bypass
Ai.SC002_GM001291 locus=Chr1:1340265:1342244:+				0	arnA	0.759878	ARO:3002985, ARO:3002985	arnA	935.25, 1060.44	determinant of polymyxin resistance, gene altering cell wall charge
Ai.SC002_GM000163 locus=Chr1:50983:52167:+				0	emrD	0.704082	ARO:3000309	emrD	516.153	efflux pump complex or subunit conferring antibiotic resistance
Ai.SC002_GM000232 locus=Chr1:138098:138811:+				2.48546e-56	vanRF	0.434211	ARO:3003841, ARO:3002929, ARO:3004054, ARO:3002923, ARO:3002919, ARO:3000816, ARO:3002927, ARO:3002925, ARO:3002926, ARO:3002928, ARO:3003582, ARO:3002924, ARO:3003728, ARO:3000828, ARO:3002921, ARO:3004055, ARO:3002922, ARO:3003066, ARO:3000838	mtrA, baeR, vanRL, smeR, arlR, Escherichia coli CpxR, vanRI, vanRA, vanRB, vanRC, vanRD, basR, vanRF, vanRG, Pseudomonas aeruginosa CpxR, kdpE, vanRM, vanRN, vanRE	130.183, 152.525, 114.39, 150.984, 158.688, 162.155, 162.54, 179.489, 156.762, 167.933, 129.798, 167.933, 160.614, 156.762, 127.487, 135.576, 149.828, 139.813, 153.68	antibiotic resistance gene cluster, cassette, or operon, determinant of aminoglycoside resistance, determinant of polymyxin resistance, determinant of resistance to glycopeptide antibiotics, efflux pump complex or subunit conferring antibiotic resistance, gene altering cell wall charge, protein(s) and two-component regulatory system modulating antibiotic efflux, protein(s) conferring antibiotic r…
Ai.SC002_GM000287 locus=Chr1:207499:208044:+				1.96111e-132	CRP	1	ARO:3000518	CRP	370.548	efflux pump complex or subunit conferring antibiotic resistance, protein(s) and two-component regulatory system modulating antibiotic efflux
Ai.SC002_GM000116 locus=Chr1:3792:6134:+				1.16677e-121	Streptomyces rishiriensis parY mutant conferring resistance to aminocoumarin	0.407666	ARO:3003316, ARO:3003318	Escherichia coli parE conferring resistance to fluoroquinolones, Streptomyces rishiriensis parY mutant conferring resistance to aminocoumarin	367.081, 382.104	antibiotic resistant gene variant or mutant, determinant of aminocoumarin resistance, determinant of fluoroquinolone resistance, gene involved in self-resistance to antibiotic
Ai.SC002_GM002105 locus=Chr1:2200206:2203667:+				0	mfd	0.784909	ARO:3003844	mfd	1873.98	antibiotic target protection protein, determinant of fluoroquinolone resistance
Ai.SC002_GM000078 locus=Plas1:77676:78491:-				0	sul2	1	ARO:3000412	sul2	528.865	antibiotic target replacement protein, determinant of sulfonamide resistance
Ai.SC002_GM001451 locus=Chr1:1514201:1514566:+				2.78841e-56	msrB	0.619835	ARO:3002818	msrB	171.785	efflux pump complex or subunit conferring antibiotic resistance
Ai.SC002_GM002684 locus=Chr1:2838653:2839816:+				8.04686e-140	Klebsiella pneumoniae OmpK37	0.585678	ARO:3004122	Klebsiella pneumoniae OmpK37	404.06	protein modulating permeability to antibiotic
Ai.SC002_GM002957 locus=Chr1:3139323:3139982:+				7.83207e-42	vanRB	0.375546	ARO:3002929, ARO:3003066, ARO:3002922, ARO:3002930, ARO:3000828, ARO:3002925, ARO:3002926, ARO:3002928, ARO:3002921, ARO:3000838, ARO:3003728, ARO:3002919, ARO:3002923	baeR, arlR, vanRM, vanRA, vanRB, vanRC, vanRD, vanRF, vanRG, vanRI, smeR, vanRN, vanRO	116.316, 124.79, 120.168, 120.939, 127.102, 135.576, 119.398, 126.331, 140.969, 138.658, 130.183, 130.954, 113.62	antibiotic resistance gene cluster, cassette, or operon, determinant of resistance to glycopeptide antibiotics, efflux pump complex or subunit conferring antibiotic resistance, protein(s) and two-component regulatory system modulating antibiotic efflux, protein(s) conferring antibiotic resistance via molecular bypass
Ai.SC002_GM002402 locus=Chr1:2514596:2515828:+				1.44545e-142	mdtA	0.56	ARO:3004043, ARO:3003922, ARO:3004073, ARO:3000810, ARO:3000803, ARO:3000783, ARO:3003704, ARO:3000792, ARO:3000800, ARO:3004042, ARO:3000780, ARO:3000795, ARO:3003051, ARO:3000377, ARO:3003055, ARO:3000774, ARO:3000499, ARO:3000789, ARO:3000777, ARO:3004041, ARO:3003698	Klebsiella pneumoniae acrA, oqxA, adeI, mdsA, Enterobacter cloacae acrA, mtrC, smeD, adeF, smeA, MuxA, mdtA, mexM, adeA, mdtE, AcrE, Escherichia coli acrA, MexE, mexP, MexC, cmeA, MexA	127.102, 125.946, 290.812, 134.42, 121.709, 133.265, 224.942, 413.69, 142.124, 130.954, 122.094, 142.895, 119.398, 132.494, 119.783, 131.339, 129.413, 125.561, 175.637, 120.168, 124.79	efflux pump complex or subunit conferring antibiotic resistance, protein(s) and two-component regulatory system modulating antibiotic efflux
Ai.SC002_GM002405 locus=Chr1:2522042:2523415:+				0	baeS	0.640969	ARO:3000839, ARO:3000549, ARO:3000830, ARO:3003067, ARO:3000829	smeS, arlS, baeS, cpxA, adeS	122.479, 130.183, 122.865, 313.538, 585.874	efflux pump complex or subunit conferring antibiotic resistance, protein(s) and two-component regulatory system modulating antibiotic efflux
Ai.SC002_GM002890 locus=Chr1:3075210:3076799:-				2.04953e-40	tetT	0.308442	ARO:3000556, ARO:3002891, ARO:3000190, ARO:3000186, ARO:3000196, ARO:3000197, ARO:3000192, ARO:3000195, ARO:3000193	tetB(P), tet44, tetT, tetS, tetM, tetO, otr(A), tet36, tet32	129.028, 123.25, 140.198, 134.035, 130.183, 144.05, 140.969, 144.821, 151.369	antibiotic target protection protein, determinant of tetracycline resistance
Ai.SC002_GM002958 locus=Chr1:3139982:3141346:+				6.0137e-41	basS	0.320366	ARO:3003583	basS	150.214	determinant of polymyxin resistance, gene altering cell wall charge

## Sheet: T3SS
Id; Description; Score; is secreted
Ai.SC002_GM001243; locus=Chr1:1283293:1283991:+;1.000000000000000;true
Ai.SC002_GM003048; locus=Chr1:3232175:3233431:-;1.000000000000000;true
Ai.SC002_GM001047; locus=Chr1:1059312:1061399:-;0.999999999999993;true
Ai.SC002_GM002181; locus=Chr1:2276580:2277833:+;0.999999999999976;true
Ai.SC002_GM001506; locus=Chr1:1568345:1568641:-;0.999999999999967;true
Ai.SC002_GM002370; locus=Chr1:2481052:2481468:+;0.999999999999601;true
Ai.SC002_GM001331; locus=Chr1:1387690:1388565:+;0.999999999999099;true
Ai.SC002_GM000421; locus=Chr1:352904:353200:-;0.999999999999035;true
Ai.SC002_GM000436; locus=Chr1:363480:364667:-;0.999999999998495;true
Ai.SC002_GM001993; locus=Chr1:2081867:2083369:+;0.999999999982797;true
Ai.SC002_GM002159; locus=Chr1:2256065:2257324:-;0.999999999981074;true
Ai.SC002_GM002161; locus=Chr1:2258307:2259557:-;0.999999999981074;true
Ai.SC002_GM002422; locus=Chr1:2539363:2539962:+;0.999999999980538;true
Ai.SC002_GM000161; locus=Chr1:49302:50048:-;0.999999999966824;true
Ai.SC002_GM000412; locus=Chr1:345095:346462:+;0.999999999946328;true
Ai.SC002_GM000389; locus=Chr1:314311:315180:-;0.999999999923302;true
Ai.SC002_GM001972; locus=Chr1:2059837:2061213:-;0.999999999908396;true
Ai.SC002_GM001003; locus=Chr1:1012919:1014004:-;0.999999999849755;true
Ai.SC002_GM000434; locus=Chr1:362325:362741:-;0.999999999685710;true
Ai.SC002_GM003146; locus=Chr1:3346570:3347607:-;0.999999999412587;true
Ai.SC002_GM003256; locus=Chr1:3490164:3491117:+;0.999999997609877;true
Ai.SC002_GM003570; locus=Plas3:30465:31742:+;0.999999997487951;true
Ai.SC002_GM002836; locus=Chr1:3022228:3022614:+;0.999999997142303;true
Ai.SC002_GM001373; locus=Chr1:1430419:1431918:+;0.999999996439946;true
Ai.SC002_GM000097; locus=Plas1:91257:91340:-;0.999999994979256;true
Ai.SC002_GM002001; locus=Chr1:2090190:2091752:+;0.999999993594274;true
Ai.SC002_GM000247; locus=Chr1:158638:159588:-;0.999999991578056;true
Ai.SC002_GM000432; locus=Chr1:361356:361994:-;0.999999988048291;true
Ai.SC002_GM000460; locus=Chr1:385526:385786:-;0.999999978432345;true
Ai.SC002_GM000809; locus=Chr1:791658:792512:-;0.999999975147922;true
Ai.SC002_GM001990; locus=Chr1:2077954:2079444:-;0.999999970509461;true
Ai.SC002_GM003626; locus=Plas3:87786:88130:-;0.999999957457959;true
Ai.SC002_GM002526; locus=Chr1:2653092:2654138:+;0.999999948637888;true
Ai.SC002_GM002762; locus=Chr1:2927006:2928685:+;0.999999947596905;true
Ai.SC002_GM000118; locus=Chr1:7123:8421:+;0.999999945838537;true
Ai.SC002_GM001168; locus=Chr1:1193778:1194557:-;0.999999944411941;true
Ai.SC002_GM001061; locus=Chr1:1073806:1075077:+;0.999999934716470;true
Ai.SC002_GM003095; locus=Chr1:3289274:3290578:+;0.999999930369361;true
Ai.SC002_GM002548; locus=Chr1:2683453:2684784:-;0.999999920932108;true
Ai.SC002_GM000727; locus=Chr1:701054:701929:+;0.999999914677203;true
Ai.SC002_GM001197; locus=Chr1:1229831:1232011:+;0.999999899563821;true
Ai.SC002_GM001480; locus=Chr1:1546110:1546604:-;0.999999858739987;true
Ai.SC002_GM000250; locus=Chr1:163030:163854:+;0.999999797899979;true
Ai.SC002_GM000643; locus=Chr1:603668:604492:-;0.999999616453562;true
Ai.SC002_GM002690; locus=Chr1:2847023:2847964:+;0.999999436799236;true
Ai.SC002_GM002146; locus=Chr1:2243599:2243796:+;0.999999404055782;true
Ai.SC002_GM001449; locus=Chr1:1512129:1512551:+;0.999999237069269;true
Ai.SC002_GM000459; locus=Chr1:384389:384784:-;0.999999176171633;true
Ai.SC002_GM000281; locus=Chr1:197447:199540:-;0.999999132805323;true
Ai.SC002_GM002002; locus=Chr1:2091749:2093170:+;0.999999054553305;true
Ai.SC002_GM003629; locus=Plas3:89883:90401:-;0.999998996912433;true
Ai.SC002_GM000971; locus=Chr1:978508:979236:+;0.999998874618072;true
Ai.SC002_GM003173; locus=Chr1:3377915:3379564:-;0.999998849278412;true
Ai.SC002_GM003443; locus=Plas2:32808:34664:+;0.999998787636006;true
Ai.SC002_GM001575; locus=Chr1:1637627:1639087:-;0.999998741412754;true
Ai.SC002_GM000606; locus=Chr1:559694:560521:+;0.999998659807735;true
Ai.SC002_GM002541; locus=Chr1:2674309:2674710:+;0.999998199037724;true
Ai.SC002_GM000433; locus=Chr1:362060:362311:-;0.999997982998975;true
Ai.SC002_GM001892; locus=Chr1:1981288:1981533:+;0.999997729296885;true
Ai.SC002_GM001680; locus=Chr1:1738800:1739123:+;0.999997716062102;true
Ai.SC002_GM001647; locus=Chr1:1702378:1703958:+;0.999997515688713;true
Ai.SC002_GM000050; locus=Plas1:55942:57021:-;0.999997385024851;true
Ai.SC002_GM003578; locus=Plas3:38944:40005:-;0.999997385024851;true
Ai.SC002_GM002575; locus=Chr1:2715588:2716058:-;0.999997359036553;true
Ai.SC002_GM003688; locus=Plas4:20566:21645:+;0.999996745374201;true
Ai.SC002_GM000769; locus=Chr1:747896:749350:+;0.999996663908507;true
Ai.SC002_GM003484; locus=Plas2:70123:71325:+;0.999996619083909;true
Ai.SC002_GM003258; locus=Chr1:3491873:3493054:+;0.999996405539525;true
Ai.SC002_GM001006; locus=Chr1:1016738:1016929:-;0.999996061162404;true
Ai.SC002_GM003004; locus=Chr1:3191344:3191970:-;0.999995595724984;true
Ai.SC002_GM002774; locus=Chr1:2945194:2945571:+;0.999995191960511;true
Ai.SC002_GM003428; locus=Plas2:19612:20691:+;0.999995181155439;true
Ai.SC002_GM000409; locus=Chr1:339015:341885:+;0.999995062254356;true
Ai.SC002_GM001233; locus=Chr1:1273516:1274304:-;0.999994899614143;true
Ai.SC002_GM000567; locus=Chr1:511342:512457:-;0.999994710874683;true
Ai.SC002_GM000749; locus=Chr1:724982:725227:+;0.999994659996809;true
Ai.SC002_GM000461; locus=Chr1:386355:386615:-;0.999994638509523;true
Ai.SC002_GM001060; locus=Chr1:1072761:1073669:+;0.999994548942065;true
Ai.SC002_GM000620; locus=Chr1:573290:573742:-;0.999993969828793;true
Ai.SC002_GM000777; locus=Chr1:757704:758138:+;0.999993914217092;true
Ai.SC002_GM002103; locus=Chr1:2198087:2198806:-;0.999993399897363;true
Ai.SC002_GM003411; locus=Plas2:6366:7271:+;0.999993269053932;true
Ai.SC002_GM003614; locus=Plas3:74937:75803:-;0.999993269053932;true
Ai.SC002_GM001661; locus=Chr1:1721377:1721949:-;0.999992005224555;true
Ai.SC002_GM003656; locus=Plas3:123226:123309:+;0.999991536888816;true
Ai.SC002_GM002075; locus=Chr1:2166711:2169050:-;0.999989984019386;true
Ai.SC002_GM002312; locus=Chr1:2415616:2416449:+;0.999989489401614;true
Ai.SC002_GM000178; locus=Chr1:68608:71046:+;0.999988487492213;true
Ai.SC002_GM000456; locus=Chr1:380617:381630:+;0.999987928295829;true
Ai.SC002_GM002131; locus=Chr1:2225019:2226224:-;0.999986146257195;true
Ai.SC002_GM003233; locus=Chr1:3464128:3465189:-;0.999984415093023;true
Ai.SC002_GM001678; locus=Chr1:1736668:1737177:-;0.999984004501769;true
Ai.SC002_GM000243; locus=Chr1:155049:156083:+;0.999983524317339;true
Ai.SC002_GM001620; locus=Chr1:1674581:1674802:+;0.999983059149333;true
Ai.SC002_GM003158; locus=Chr1:3358674:3359588:+;0.999982930423741;true
Ai.SC002_GM002756; locus=Chr1:2918795:2919760:-;0.999981243704866;true
Ai.SC002_GM001144; locus=Chr1:1169722:1170075:-;0.999980470389253;true
Ai.SC002_GM001539; locus=Chr1:1601269:1602552:+;0.999980026172519;true
Ai.SC002_GM001569; locus=Chr1:1629808:1630941:-;0.999979220584328;true
Ai.SC002_GM000435; locus=Chr1:362842:363483:-;0.999978719268340;true
Ai.SC002_GM000165; locus=Chr1:53414:54922:-;0.999977121323310;true
Ai.SC002_GM000559; locus=Chr1:502075:503220:-;0.999974433999771;true
Ai.SC002_GM003640; locus=Plas3:108863:109225:+;0.999974371736145;true
Ai.SC002_GM000007; locus=Plas1:7728:8633:+;0.999973516776755;true
Ai.SC002_GM003721; locus=Plas4:53137:54042:+;0.999973516776755;true
Ai.SC002_GM001601; locus=Chr1:1659956:1660192:-;0.999973206148191;true
Ai.SC002_GM001257; locus=Chr1:1298914:1300119:-;0.999972829045077;true
Ai.SC002_GM001489; locus=Chr1:1553845:1554249:-;0.999972517011294;true
Ai.SC002_GM000424; locus=Chr1:354690:355571:-;0.999972011845739;true
Ai.SC002_GM003236; locus=Chr1:3467600:3469912:-;0.999965859122801;true
Ai.SC002_GM003022; locus=Chr1:3207214:3207564:-;0.999963862411757;true
Ai.SC002_GM000703; locus=Chr1:671735:672715:+;0.999961138927291;true
Ai.SC002_GM000199; locus=Chr1:93319:94230:+;0.999957557487525;true
Ai.SC002_GM002921; locus=Chr1:3109239:3110426:-;0.999957472454763;true
Ai.SC002_GM002766; locus=Chr1:2932243:2934594:+;0.999955326277971;true
Ai.SC002_GM001619; locus=Chr1:1673997:1674584:+;0.999953449248643;true
Ai.SC002_GM001250; locus=Chr1:1289952:1291610:+;0.999949252424746;true
Ai.SC002_GM002600; locus=Chr1:2740600:2742312:+;0.999945009179659;true
Ai.SC002_GM001926; locus=Chr1:2010926:2011150:+;0.999944416603505;true
Ai.SC002_GM000729; locus=Chr1:702850:704085:+;0.999943651654343;true
Ai.SC002_GM000330; locus=Chr1:256036:256596:+;0.999942411159969;true
Ai.SC002_GM003368; locus=Chr1:3620990:3621970:-;0.999922837981630;true
Ai.SC002_GM001350; locus=Chr1:1406976:1407950:-;0.999921151708426;true
Ai.SC002_GM002710; locus=Chr1:2865096:2865758:+;0.999919866768772;true
Ai.SC002_GM001436; locus=Chr1:1493961:1495736:-;0.999919392840009;true
Ai.SC002_GM000746; locus=Chr1:720073:721458:-;0.999918254531037;true
Ai.SC002_GM003136; locus=Chr1:3334905:3335828:-;0.999911889926168;true
Ai.SC002_GM002176; locus=Chr1:2271306:2273027:+;0.999910130556503;true
Ai.SC002_GM002595; locus=Chr1:2733802:2735262:+;0.999908965017043;true
